# Supplementary material for: Dose–response effects of exercise training on the subjective sleep quality of postmenopausal women: exploratory analyses of a randomised controlled trial
Source: PubMed Central journal article supplement — BMJ Open. 2012 Jul 12;2(4):e001044. doi: 10.1136/bmjopen-2012-001044 (PMC3400065; doi:10.1136/bmjopen-2012-001044), 2012-07-12
Supplement: bmjopen-2012-001044.draft_revisions.pdf [file bmjopen-2012-001044.draft_revisions.pdf]

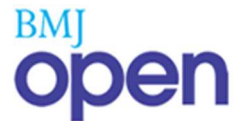

**Dose-Response Effects of Exercise Training on the  
Subjective Sleep Quality of Postmenopausal Women: A  
Randomised Controlled Trial**

|                                 |                                                                                                                                                                                                                                                                                                                                                                                                                                                                                                                                                                     |
|---------------------------------|---------------------------------------------------------------------------------------------------------------------------------------------------------------------------------------------------------------------------------------------------------------------------------------------------------------------------------------------------------------------------------------------------------------------------------------------------------------------------------------------------------------------------------------------------------------------|
| Journal:                        | <i>BMJ Open</i>                                                                                                                                                                                                                                                                                                                                                                                                                                                                                                                                                     |
| Manuscript ID:                  | bmjopen-2012-001044                                                                                                                                                                                                                                                                                                                                                                                                                                                                                                                                                 |
| Article Type:                   | Research                                                                                                                                                                                                                                                                                                                                                                                                                                                                                                                                                            |
| Date Submitted by the Author:   | 21-Feb-2012                                                                                                                                                                                                                                                                                                                                                                                                                                                                                                                                                         |
| Complete List of Authors:       | Kline, Christopher; University of Pittsburgh School of Medicine, Department of Psychiatry<br>Sui, Xuemi; University of South Carolina, Exercise Science Hall, Martica; University of Pittsburgh School of Medicine, Department of Psychiatry<br>Youngstedt, Shawn; University of South Carolina, Department of Exercise Science<br>Blair, Steven; Univ South Carolina, Dept of Exercise Science<br>Earnest, Conrad; Louisiana State University, Department of Preventive Medicine<br>Church, Timothy; Louisiana State University, Department of Preventive Medicine |
| <b>Primary Subject Heading</b>: | Public health                                                                                                                                                                                                                                                                                                                                                                                                                                                                                                                                                       |
| Secondary Subject Heading:      | Sports and exercise medicine, Mental health                                                                                                                                                                                                                                                                                                                                                                                                                                                                                                                         |
| Keywords:                       | sleep, exercise, postmenopausal, exercise training                                                                                                                                                                                                                                                                                                                                                                                                                                                                                                                  |
|                                 |                                                                                                                                                                                                                                                                                                                                                                                                                                                                                                                                                                     |

SCHOLARONE™  
Manuscripts

1  
2  
3 **Dose-Response Effects of Exercise Training on the Subjective Sleep Quality of**  
4  
5 **Postmenopausal Women: A Randomised Controlled Trial**  
6  
7  
8  
9

10 Christopher E. Kline,<sup>1</sup> Xuemei Sui,<sup>2</sup> Martica Hall,<sup>1</sup> Shawn D. Youngstedt,<sup>2,3,4</sup>

11  
12 Steven N. Blair,<sup>2,5</sup> Conrad P. Earnest,<sup>6</sup> Timothy S. Church<sup>6</sup>  
13  
14  
15  
16

17 <sup>1</sup> *Department of Psychiatry, University of Pittsburgh School of Medicine, Pittsburgh, PA USA;*

18 <sup>2</sup> *Department of Exercise Science, University of South Carolina, Columbia, SC USA;*

19 <sup>3</sup> *WJB Dorn VA Medical Center, Columbia, SC USA;*

20 <sup>4</sup> *Department of Psychology, University of South Carolina, Columbia, SC USA;*

21 <sup>5</sup> *Department of Epidemiology and Biostatistics, University of South Carolina, Columbia, SC*

22  
23  
24  
25  
26  
27  
28  
29  
30  
31  
32  
33  
34  
35  
36  
37  
38  
39  
40  
41  
42  
43  
44  
45  
46  
47  
48  
49  
50  
51  
52  
53  
54  
55  
56  
57  
58  
59  
60  
*USA;*

<sup>6</sup> *Department of Preventive Medicine, Pennington Biomedical Research Center, Louisiana State  
University, Baton Rouge, LA USA.*

**Corresponding Author:** Christopher E. Kline, Ph.D., Department of Psychiatry, University of  
Pittsburgh School of Medicine, 3811 O'Hara Street, Pittsburgh, PA 15213; tel.: 412-578-  
9554; fax: 412-246-5300; e-mail: klinec@upmc.edu.

**Key words:** exercise, sleep, postmenopausal, exercise training

**Main text word count:** 3729

## ABSTRACT

**Objective:** To investigate whether a dose-response relationship existed between exercise and subjective sleep quality in postmenopausal women.

**Design:** Parallel group randomised controlled trial.

**Setting:** Clinical exercise physiology laboratory in Dallas, Texas.

**Participants:** 437 sedentary overweight/obese postmenopausal women with baseline sleep data (out of 464 enrolled for participation).

**Intervention:** Participants were randomised to 1 of 4 treatments, each of 6 months' duration: a non-exercise control treatment ( $n=92$ ) or one of three dosages of moderate-intensity exercise (50% of  $VO_{2peak}$ ), designed to meet 50% ( $n=151$ ), 100% ( $n=99$ ), or 150% ( $n=95$ ) of NIH Consensus Development Panel physical activity recommendations. Exercise dosages were structured to elicit energy expenditures of 4, 8 or 12 kilocalories per kilogram of body weight per week (KKW), respectively. Analyses were intent-to-treat.

**Primary outcome measures:** Continuous scores and odds of having significant sleep disturbance, as assessed by the Sleep Problems Index from the 6-item Medical Outcomes Study (MOS) Sleep Scale. Outcome assessors were blinded to participant randomisation assignment.

**Results:** Change in the MOS Sleep Problems Index score significantly differed by treatment group (control: -2.09 [95% confidence interval, -4.58 to 0.40], 4 KKW: -3.93 [-5.87 to -1.99], 8 KKW: -4.06 [-6.45 to -1.67], 12 KKW: -6.22 [-8.68 to -3.77];  $P=.04$ ), with a significant dose-response trend observed ( $P=.02$ ). Exercise training participants had lower odds of having significant sleep disturbance at post-intervention compared to control (4 KKW OR: 0.37 [0.19 to 0.73], 8 KKW: 0.36 [0.17 to 0.77], 12 KKW: 0.34 [0.16 to 0.72]). The magnitude of weight loss

1  
2  
3 did not differ between treatment conditions. Improvements in sleep quality were not related to  
4  
5 changes in body weight, resting parasympathetic control, or cardiorespiratory fitness.  
6  
7

8 **Conclusion:** Exercise training induced significant improvement in subjective sleep quality in  
9  
10 postmenopausal women, with even a low dose of exercise resulting in greatly reduced odds of  
11  
12 having significant sleep disturbance.  
13

14  
15 **Trial registration:** clinicaltrials.gov identifier: NCT00011193.  
16  
17  
18  
19  
20  
21  
22  
23  
24  
25  
26  
27  
28  
29  
30  
31  
32  
33  
34  
35  
36  
37  
38  
39  
40  
41  
42  
43  
44  
45  
46  
47  
48  
49  
50  
51  
52  
53  
54  
55  
56  
57  
58  
59  
60

## ARTICLE SUMMARY

### Article Focus:

- Sleep disturbance is prevalent in postmenopausal women, with 35-60% reporting significant sleep problems.
- Effective, safe and easily available treatment options for disturbed sleep in postmenopausal women are lacking.
- There has been equivocal evidence as to whether exercise improves sleep in postmenopausal women, though possible dose-response effects have been noted.

### Key Messages:

- Exercise resulted in significant improvement in subjective sleep quality in postmenopausal women, with reduced odds of having sleep disturbance at post-intervention with even 50% of the recommended dose of exercise for adults.
- The effects of exercise on sleep quality were independent of changes in body weight, resting parasympathetic control, or cardiorespiratory fitness.

### Strengths and Limitations:

- The study constitutes the largest randomised controlled trial on exercise and sleep quality, using a structured dose of exercise and a validated measure of sleep quality.
- Only self-reported sleep was assessed; objective measurement of sleep, with either actigraphy or polysomnography, was not conducted.
- Despite the high prevalence of sleep disturbance in the sample, participants were not selected on the basis of sleep complaints.

## INTRODUCTION

Disturbed sleep is a common complaint among women, with increasing prevalence beginning at the menopausal transition. Postmenopausal women are more likely to report sleep problems than premenopausal or perimenopausal women,[1] with 35-60% of postmenopausal women reporting significant sleep problems.[2] The first-line treatment options for sleep complaints, hypnotic medication and cognitive behavioral therapy, have associated concerns about the safety of long-term use or treatment availability, respectively.[3,4] Furthermore, results are conflicting on the effect of hormone replacement therapy (HRT) on sleep quality,[5,6] despite the effectiveness of HRT at reducing other menopausal symptoms.

A nonpharmacological treatment that has been traditionally thought to improve sleep is exercise. In epidemiologic research, exercise has frequently been associated with better sleep.[7] However, experimental research has provided less compelling evidence,[8] particularly when regarding postmenopausal women. Of the four randomised trials that have investigated the effect of exercise on sleep quality in this population,[9-12] only one reported a significant improvement in subjective sleep quality following an exercise intervention.[12] However, despite the generally negative findings from these studies involving postmenopausal women, possible dose-response effects of exercise on sleep quality were noted. In one of these studies, women who performed at least 225 minutes of morning exercise per week had less trouble falling asleep compared to those who exercised less than 180 minutes per week in the morning.[9] Likewise, another study reported a positive association between walking frequency and improvements in sleep.[11]

To our knowledge, no research has directly investigated the effects of different doses of exercise on sleep quality. The Dose-Response to Exercise in postmenopausal Women (DREW) trial was conducted to investigate the health effects of 50%, 100%, and 150% of the NIH

1  
2  
3 Consensus Development Panel physical activity recommendations in a group of sedentary  
4  
5 postmenopausal women.[13] Results on the primary outcomes of the study, cardiorespiratory  
6  
7 fitness and blood pressure, have already been reported.[14] Subjective sleep quality was also  
8  
9 assessed in this trial as an exploratory outcome, and the data provided herein provides the first  
10  
11 systematic examination of whether a dose-response relationship exists between exercise and  
12  
13 subjective sleep quality. It was hypothesised that, in comparison to a non-exercise control group,  
14  
15 subjective sleep quality would improve with increasing dosage of exercise.  
16  
17  
18

## 19 20 METHODS

21  
22 A complete description of the recruitment and screening procedures has been published  
23  
24 elsewhere.[13] Briefly, the study was a randomised, controlled, multi-arm parallel group trial in  
25  
26 which the primary outcomes were examining whether there were dose-response effects on  
27  
28 cardiorespiratory fitness and blood pressure with incrementally increasing doses of energy  
29  
30 expenditure.[13,14] The study was approved annually by the Cooper Institute Institutional  
31  
32 Review Board, and written informed consent was obtained by all participants prior to study  
33  
34 involvement.  
35  
36  
37

### 38 39 Participants

40  
41 Participants were recruited from the Dallas, Texas, metropolitan area from April 2001 to  
42  
43 June 2005. Of 4545 women screened for eligibility, those who were aged 45-75 years,  
44  
45 postmenopausal, sedentary ( $\leq 20$  min of exercise on  $\leq 2$  days/week and  $< 8000$  steps/day,  
46  
47 averaged over one week), overweight or obese (body mass index [BMI] of 25-43 kg/m<sup>2</sup>), and  
48  
49 had normal to mildly elevated resting blood pressure (systolic blood pressure [SBP] of 120-159  
50  
51 mm Hg and diastolic blood pressure [DBP]  $\leq 99$  mm Hg) were eligible to participate (Figure 1).  
52  
53 Exclusion criteria included significant cardiovascular disease, recent hospitalisation for mental  
54  
55  
56  
57  
58  
59  
60

1  
2  
3 illness or significant symptoms of depression (score  $\geq 10$  on the Center for Epidemiologic  
4  
5 Studies Depression scale), or any other health condition that would contraindicate participation  
6  
7  
8 in an exercise program. Overall, 464 women were randomised to treatment, with baseline sleep  
9  
10 data available for 437 participants.

### 11 12 **Randomisation and Retention**

13  
14  
15 Prior to randomisation, participants completed a two-week run-in period, in which  
16  
17 participants received lifestyle modification instruction over the course of six laboratory visits.  
18  
19 The primary purpose of this run-in period was to maximise retention and adherence to the  
20  
21 subsequent intervention. Participants were compensated for completing baseline and post-  
22  
23 intervention assessments, with additional compensation based on intervention adherence.[13]  
24  
25

26  
27 Allocation of participants to treatment conditions was accomplished using a computer-  
28  
29 generated randomisation sequence, determined from randomly permuted blocks of equal length  
30  
31 with fixed numbers of treatment allotments to balance treatment enrollments over time.

32  
33 Allocation concealment was achieved by placing treatment assignment letters into sequentially  
34  
35 numbered opaque envelopes sealed by the study statistician. At the time of randomisation,  
36  
37 envelopes were opened by a staff member not affiliated with the randomisation process.[13]  
38  
39

40  
41 Participants were randomised to one of four treatment conditions: a non-exercise control  
42  
43 group, or one of three exercise groups expending 4, 8, or 12 kilocalories per kilogram of body  
44  
45 weight per week (KKW). Energy expenditure levels for the exercise groups were designed to  
46  
47 correspond with 50%, 100%, and 150% of the NIH Consensus Development Panel physical  
48  
49 activity recommendations, respectively.[15]  
50  
51

### 52 **Interventions**

53  
54  
55  
56  
57  
58  
59  
60



1  
2  
3 Women assigned to the exercise groups participated in 3-4 training sessions/week for 6  
4 months, alternating between semirecumbent cycle ergometer and treadmill exercise. Training  
5 sessions were conducted in a supervised laboratory setting, and exercise dosage was closely  
6 monitored for each session. Training intensity was moderate, set at the heart rate associated with  
7 50% of each woman's  $VO_{2peak}$  and continuously monitored by heart rate telemetry. To determine  
8 the number of calories that needed to be expended each week, participants were weighed weekly  
9 and their weight was multiplied by the exercise dosage.  
10  
11  
12  
13  
14  
15  
16  
17  
18

19  
20 Exercise dose was gradually increased to minimise injury risk. All exercise training  
21 groups expended 4 KKW during the first intervention week, with the 4-KKW group continuing  
22 at that dose for 6 months. The 8- and 12-KKW groups increased their energy expenditure by 1  
23 KKW until they reached their appointed exercise doses.  
24  
25  
26  
27  
28

### 29 **Blinding**

30  
31 Although participants could not be blinded to their treatment, staff were separated into  
32 intervention and assessment teams to ensure blinding of all assessment staff to participant  
33 randomisation assignment. Participants were consistently reminded to refrain from discussing  
34 their randomisation assignments with outcome assessment staff.  
35  
36  
37  
38  
39  
40

### 41 **Sleep Measure**

42  
43 Subjective sleep quality was assessed with six items from the Medical Outcomes Study  
44 (MOS) Sleep Scale.[16] At baseline and post-intervention, participants were asked to respond  
45 based on their sleep during the previous four weeks. One question, which addressed the length of  
46 time to fall asleep, was framed with five response options ranging from 0-15 minutes to > 60  
47 minutes. For the remaining five questions (i.e., restless sleep, daytime drowsiness, difficulty  
48 falling asleep, awakening from sleep and experiencing difficulty returning to sleep, staying  
49  
50  
51  
52  
53  
54  
55  
56  
57  
58  
59  
60

1  
2  
3 awake during the day), participants were asked to respond on a 5-point scale, ranging from “none  
4 of the time” to “all of the time”. Item responses were assigned scores using conventional scoring  
5 rules, with higher scores indicating a greater severity of sleep disturbance. A modified Sleep  
6 Problems Index (SPI), utilising all six sleep items, provided a measure of overall sleep  
7 quality.[17] SPI scores greater than 25 were considered to indicate significant sleep disturbance,  
8 as prior work utilising a 9-item SPI reported that a cutpoint of > 25 identified individuals who  
9 considered themselves to have a sleep problem with a sensitivity of 86.2% and specificity of  
10 66.3%.[17]

11  
12 Scores on the MOS Sleep Scale have been shown to correlate with other MOS health  
13 items,[16] differentiate between those with and without chronic health conditions,[17] and  
14 improve with treatment of chronic health conditions.[18] Normative values for the general  
15 population have also been developed.[17]

### 31 **Other Measures**

32  
33 Baseline demographic and health characteristics were assessed by completion of a  
34 comprehensive medical history questionnaire. Height and weight were measured with a  
35 calibrated stadiometer and electronic scale, respectively. Diet was assessed before and following  
36 the intervention using a semi-quantitative food frequency questionnaire, whereas unsupervised  
37 physical activity was monitored throughout the study with a pedometer (Accusplit Eagle, Japan).

38  
39 Cardiorespiratory fitness ( $VO_{2peak}$ ) was assessed from maximal exercise testing using a  
40 cycle ergometer (Excalibur Sport, Lode Medical Technology, Groningen, Netherlands), as  
41 previously described.[14] Testing was performed twice at baseline and twice at post-  
42 intervention, with values from each timepoint averaged. Heart rate variability (HRV) was  
43 measured from the final 5 min of a 25-min resting assessment, as previously described.[19] The  
44  
45  
46  
47  
48  
49  
50  
51  
52  
53  
54  
55  
56  
57  
58  
59  
60

1  
2  
3 square root of the mean of the sum of the squares of differences between adjacent R-R intervals  
4  
5 (rMSSD), a marker of parasympathetic activity,[20] was retained for analysis.  
6  
7

### 8 **Statistical Power**

9  
10 Sample size was originally based on having adequate power to detect changes in the  
11 primary outcomes of the overall study,  $VO_{2peak}$  and blood pressure.[14] Additional participants  
12 were allocated to the 4 KKW condition to increase statistical power for detecting smaller  
13 anticipated fitness gains in this group. Because sleep was not a primary outcome in the design of  
14 the original study, there was no opportunity before data collection to investigate sample size or  
15 power for this outcome variable. Nevertheless, given the current enrollment, the study had 84%  
16 power (assuming two-tailed  $\alpha = 0.05$ ) to detect an effect size of 0.20 for MOS SPI score  
17 reduction.  
18  
19  
20  
21  
22  
23  
24  
25  
26  
27  
28

### 29 **Statistical Analysis**

30  
31 Baseline sleep quality was compared against normative data[17] using a one-sample *t*-  
32 test. Continuous MOS SPI values were examined across quartiles of BMI, parasympathetic tone  
33 (rMSSD), and cardiorespiratory fitness ( $VO_{2peak}$ ) with analysis of covariance (ANCOVA),  
34 controlling for age, BMI, sleep medication use, and HRT use. The likelihood of having  
35 significant sleep disturbance at baseline (i.e., MOS SPI > 25) was evaluated with logistic  
36 regression across the same quartiles using the same covariates.  
37  
38  
39  
40  
41  
42  
43  
44  
45

46 Two primary outcomes were evaluated for the current study: (1) change in continuous  
47 MOS SPI score across treatment groups; (2) odds of having significant sleep disturbance at post-  
48 intervention across treatment groups. Change in continuous MOS SPI scores across groups was  
49 tested by ANCOVA, with adjustment for age, BMI, sleep medication use, HRT use, and baseline  
50 MOS SPI values. Individual treatment groups were compared to the control group with Tukey-  
51  
52  
53  
54  
55  
56  
57  
58  
59  
60

1  
2  
3 Kramer adjustment for multiple comparisons. An  $\alpha$  level of .05 was used because it was our *a*  
4 *priori* intention to compare only the separate treatment groups with the control group. Dose-  
5  
6 *priori* intention to compare only the separate treatment groups with the control group. Dose-  
7  
8 response trends were analysed using least-squares regression of MOS SPI change across groups.  
9  
10 Logistic regression examined the odds of having significant sleep disturbance at post-  
11  
12 intervention, following adjustment for age, BMI, sleep medication and HRT use, and baseline  
13  
14 sleep disturbance ( $SPI > 25$ ,  $SPI \leq 25$ ). Unadjusted analyses provided similar results to those  
15  
16 with covariate control, so only those results with full covariate adjustment were reported.  
17  
18

19  
20 Finally, to examine whether improved sleep quality was significantly influenced by body  
21  
22 weight, parasympathetic tone, or cardiorespiratory fitness, changes in weight, rMSSD, and  
23  
24  $VO_{2peak}$  were added to the ANCOVA and logistic regression analyses. Additionally, among  
25  
26 completed participants, changes in MOS SPI score were evaluated across quartiles of change in  
27  
28 body weight, rMSSD, and  $VO_{2peak}$  following adjustment for age, treatment, BMI, sleep  
29  
30 medication use, HRT use, and baseline MOS SPI score.  
31  
32

33  
34 Analyses were limited to participants with baseline MOS Sleep data. Primary analyses  
35  
36 were conducted using the intent-to-treat principle; if post-intervention data were missing,  
37  
38 baseline values were carried forward for analysis. When analyses were restricted to only those  
39  
40 participants with baseline and post-intervention MOS Sleep data ( $n = 359$ ), results were not  
41  
42 substantively changed; therefore, only intent-to-treat analyses were presented. All analyses were  
43  
44 performed using SAS version 9.2 (SAS Institute, Cary, NC). All tests were two-tailed, with  
45  
46 statistical significance set at  $P \leq .05$ .  
47  
48  
49

## 50 RESULTS

### 51 Participant Characteristics

52  
53  
54  
55  
56  
57  
58  
59  
60

1  
2  
3 A summary of participant characteristics is provided in Table 1. Mean age and BMI of  
4  
5 the 437 participants were  $57.3 \pm 6.5$  yr and  $31.8 \pm 3.9$  kg/m<sup>2</sup>, respectively.  
6  
7

8 Baseline MOS SPI values and prevalence of sleep disturbance are provided in Table 1.  
9  
10 Of the 437 participants, 46% of the sample ( $n = 200$ ) were considered to have significant sleep  
11  
12 disturbance at baseline, as defined as MOS SPI > 25. Baseline sleep quality of the participants  
13  
14 was significantly worse than normative values[17] (normative value: 25.79;  $t_{436} = 2.42$ ,  $P = .02$ ),  
15  
16 a magnitude of 0.12 SD.[21]  
17  
18

19 Baseline continuous MOS SPI values and odds of sleep disturbance across quartiles of  
20  
21 BMI, rMSSD, and VO<sub>2peak</sub> are shown in Table 2. Sleep quality significantly differed among  
22  
23 quartiles of rMSSD ( $F_{3,343} = 2.55$ ,  $P = .05$ ), with the lowest quartile of rMSSD having  
24  
25 significantly worse baseline sleep quality than the other quartiles of rMSSD. Similarly, each  
26  
27 quartile of rMSSD was associated with lower odds of having significant sleep disturbance at  
28  
29 baseline compared to the lowest quartile of rMSSD. No differences in MOS SPI values or odds  
30  
31 of having significant sleep disturbance were observed across quartiles of BMI or VO<sub>2peak</sub>.  
32  
33  
34  
35

### 36 **Exercise Training Adherence, Diet and Unsupervised Activity**

37  
38 Treatment adherence was calculated as the percentage of exercise energy expenditure  
39  
40 achieved compared to the amount of exercise energy expenditure that was prescribed. Adherence  
41  
42 was similar between exercise groups (4 KKW:  $95.1 \pm 16.1\%$ , 8 KKW:  $88.5 \pm 26.1\%$ , 12 KKW:  
43  
44  $92.5 \pm 20.9\%$ ), as previously reported.[14]  
45  
46  
47

48 Changes in diet and unsupervised activity have been previously reported.[14,22] Pre- to  
49  
50 post-intervention changes in energy intake did not differ between treatment conditions.  
51  
52 Pedometer-assessed unsupervised activity ranged from 4766 to 5067 steps/day at baseline and  
53  
54 did not differ between groups. Compared to baseline, daily steps increased for each group at  
55  
56  
57  
58  
59  
60

1  
2  
3 month 1 (each  $P < .05$ ), with greater steps in the control group than the three exercise groups  
4  
5 (each  $P < .05$ ). However, no differences in daily steps between the control and exercise groups  
6  
7 were observed by months 5 and 6. Among the exercise groups, daily steps did not change from  
8  
9 months 1 through 6. Therefore, the results reported here are unlikely to be due to changes in diet  
10  
11 or spontaneous activity outside the exercise training laboratory.  
12  
13

### 14 15 **Changes in Sleep Quality with Exercise Training**

16  
17 Changes in sleep quality with exercise training are depicted in Figure 2. A significant  
18  
19 effect of the intervention was noted in the full model ( $F_{8,428} = 17.35, P < .001$ ), with treatment  
20  
21 group being an independent predictor of change in continuous MOS SPI score ( $F_{3,428} = 2.79, P =$   
22  
23  $.04$ ) following control for age, BMI, HRT use, sleep medication use, and baseline MOS SPI  
24  
25 values. Moreover, a significant linear dose-response effect was found for MOS SPI scores across  
26  
27 treatment groups ( $P = .02$ ). When compared against control, a significantly greater improvement  
28  
29 in MOS SPI score was found for the 12-KKW group ( $P = .02$ ).  
30  
31  
32  
33

34 The association between sleep disturbance (i.e., MOS SPI > 25) at post-intervention and  
35  
36 treatment is summarised in Table 3. Compared to control and following covariate adjustment,  
37  
38 each exercise training group had lower odds of having significant sleep disturbance following the  
39  
40 intervention, with the odds of having significant sleep disturbance decreasing while exercise  
41  
42 dose increased (linear trend  $P = .01$ ).  
43  
44  
45

### 46 47 **Influences of Change in Weight, Fitness, and Parasympathetic Tone on Sleep**

48  
49 Post-intervention changes in body weight, parasympathetic tone, and cardiorespiratory  
50  
51 fitness for the overall DREW sample have been previously reported.[14,19] In the present  
52  
53 study's sample, the magnitude of weight loss did not differ between treatment groups (control: -  
54  
55 1.08 [3.70], 4 KKW: -1.23 [3.43], 8 KKW: -1.60 [3.23], 12 KKW: -1.25 [2.83] kg;  $F_{3,433} = 0.43,$   
56  
57  
58  
59  
60

1  
2  
3  $P = .73$ ). Cardiorespiratory fitness improved with exercise training in a dose-dependent manner  
4  
5 (control: -0.20 [1.88], 4 KKW: 0.59 [1.83], 8 KKW: 1.13 [1.54], 12 KKW: 1.42 [1.79]

6  
7 mL/kg/min;  $F_{3,433} = 15.32$ ,  $P < .001$ ). Among those with usable HRV and sleep data ( $n = 351$ ),  
8  
9 rMSSD improved in a dose-dependent fashion with exercise training (control: 0.20 [8.45], 4  
10  
11 KKW: 2.72 [9.20], 8 KKW: 3.72 [11.47], 12 KKW: 5.29 [9.51] ms;  $F_{3,347} = 3.82$ ,  $P = .01$ ).

12  
13  
14 When added to the model analysing differences in continuous MOS SPI change among treatment  
15  
16 groups, none of these covariates were significant ( $P \leq .14$ ), and inclusion of these variables did  
17  
18 not alter the previously noted treatment group differences or linear dose-response effects. When  
19  
20 individually added to logistic regression analyses, none of these covariates significantly affected  
21  
22 the odds of having significant sleep disturbance at post-intervention (Table 3). In addition, when  
23  
24 change in MOS SPI was evaluated across quartiles of change in body weight, rMSSD, or  
25  
26  $VO_{2peak}$ , no significant-between group differences were noted (data not shown). Finally, change  
27  
28 in MOS SPI did not correlate with change in body weight, rMSSD or  $VO_{2peak}$  ( $r < .03$ ,  $P > .58$ ).

## 33 34 **DISCUSSION**

35  
36 The key finding from exploratory analyses of the DREW randomised controlled trial was  
37  
38 that exercise training significantly improved subjective sleep quality in overweight/obese  
39  
40 postmenopausal women. Specifically, we observed a dose-response trend for the continuous  
41  
42 MOS SPI values and, perhaps most notably, significantly reduced odds of having sleep  
43  
44 disturbance at post-intervention with even 50% of the recommended dose of exercise for adults.  
45  
46 Interestingly, the improvements in sleep quality were not related to changes in body weight,  
47  
48 parasympathetic tone, or cardiorespiratory fitness.  
49  
50

### 51 52 **Previous research**

1  
2  
3 Previous research with postmenopausal women had yielded conflicting findings  
4 regarding whether exercise improved sleep.[9-12] While suggested by prior studies in this  
5 population,[9,11] the present study is the first to document a dose-response relationship between  
6 exercise and improved subjective sleep quality. Although sleep was an exploratory outcome of  
7 the DREW study, it is the largest clinical trial to date that has examined the relationship between  
8 aerobic exercise dose and sleep quality. Our current findings mirror the overall body of research  
9 indicating that exercise improves sleep, most prominently in those with existing sleep  
10 disturbances.[8]  
11  
12  
13  
14  
15  
16  
17  
18  
19  
20  
21

### 22 **Clinical implications**

23  
24 When considering the improvements in continuous MOS SPI scores following exercise  
25 training, the clinical significance is uncertain. The observation that only those who exercised at a  
26 12-KKW dose experienced a significant improvement in sleep quality compared to control may  
27 be viewed as discouraging, as this dose equated to approximately 190 min/wk of moderate-  
28 intensity aerobic exercise[14] and many individuals may not be willing to perform that much  
29 exercise to improve sleep. However, the significant dose-response effect suggests that any dose  
30 of exercise should benefit sleep, albeit with larger effects noted with higher levels of energy  
31 expenditure.  
32  
33  
34  
35  
36  
37  
38  
39  
40  
41  
42

43 In contrast, the greatly reduced odds of having significant sleep disturbance following  
44 exercise training suggests that exercise may hold the most promise as a treatment option for  
45 postmenopausal women with significant sleep disturbance. In particular, even an exercise dose  
46 consisting of 50% of the NIH Consensus Panel physical activity recommendations significantly  
47 reduced the odds of having a post-intervention MOS SPI > 25. This is noteworthy, since sleep  
48 complaints are prevalent in postmenopausal women[1] and current treatment options, such as  
49  
50  
51  
52  
53  
54  
55  
56  
57  
58  
59  
60



1  
2  
3 HRT and hypnotic medication, have often been found to be only mildly efficacious at improving  
4 sleep quality compared to placebo in postmenopausal women.[6,23]  
5  
6

7  
8 The mechanisms by which exercise may improve subjective sleep quality in  
9  
10 postmenopausal women are unknown. Although the present study was not specifically designed  
11  
12 to address mechanisms of effect, secondary analyses focused on changes in three variables which  
13  
14 have been shown to be related to sleep: body weight, parasympathetic activity, and  
15  
16 cardiorespiratory fitness. There is a clear association between obesity and disturbed sleep,[24]  
17  
18 and weight loss has been found to reduce sleep complaints.[25] Likewise, poor sleepers have  
19  
20 been found to have impaired sleep HRV,[26] and exercise training has been well-documented to  
21  
22 improve autonomic function.[27] Finally, physical fitness has been previously associated with  
23  
24 sleep quality,[28] and greater improvements in fitness have been associated with better sleep  
25  
26 outcomes in some experimental studies.[9,12]  
27  
28  
29  
30

31  
32 Nonetheless, in the present study, changes in body weight, parasympathetic tone, or  
33  
34 cardiorespiratory fitness were not significantly related to changes in sleep, whether assessed by  
35  
36 covariate control, change in sleep quality across quartiles of change in these variables, or  
37  
38 correlations between change in these variables and change in sleep quality. Although significant  
39  
40 improvements were noted for rMSSD and  $VO_{2peak}$  following exercise training in this  
41  
42 sample,[14,19] the variability associated with the sleep measure used in the current study may  
43  
44 have masked any possible associations. The present study suggests that exercise training can  
45  
46 result in improved sleep quality independent of weight loss, increased fitness, or improved  
47  
48 autonomic balance.  
49  
50  
51

### 52 **Strengths and weaknesses**

53  
54  
55  
56  
57  
58  
59  
60

1  
2  
3 Strengths of the study include a randomised controlled design, closely supervised  
4  
5 intervention, use of a validated measure of sleep quality, and the largest experimental sample  
6  
7 size to investigate the effects of exercise on sleep. The study population was another strength, as  
8  
9 the prevalence of disturbed sleep was high. Finally, assessment of variables that are related to  
10  
11 sleep quality and may contribute to improved sleep following exercise training was another  
12  
13 strength of the study.  
14  
15

16  
17 A limitation of the study is that sleep quality was not a primary outcome of the original  
18  
19 DREW trial. Therefore, results should be interpreted cautiously. Another study limitation is that  
20  
21 sleep was not objectively assessed (i.e., via wrist actigraphy or polysomnography). Because of  
22  
23 the subjective nature of the outcome and impossibility of blinding participants to their treatment,  
24  
25 improvements in self-reported sleep quality may have been subject to expectancy effects, as  
26  
27 exercise is commonly believed to improve sleep quality.[7] However, the finding of a significant  
28  
29 linear trend between exercise dose and improvement in sleep quality would not necessarily be  
30  
31 expected. Moreover, that sleep was not a primary outcome of interest and part of a wide range of  
32  
33 study assessments further reduces the chance of expectancy or demand biases. Additionally,  
34  
35 there is growing recognition of the merit of assessing subjective sleep quality.[29] For instance,  
36  
37 in contrast with subjective sleep quality, objective sleep has not been found to be altered across  
38  
39 the menopausal transition.[30] Furthermore, impaired subjective sleep quality is what prompts  
40  
41 search for treatment, and recent evidence suggests that traditional objective sleep measures might  
42  
43 be inadequate for detecting subtle indicators of disturbed sleep.[31] It is also noteworthy that  
44  
45 subjective sleep quality has been associated with quality of life and physical and mental health in  
46  
47 postmenopausal women.[32]  
48  
49  
50  
51  
52  
53  
54  
55  
56  
57  
58  
59  
60

1  
2  
3 A lack of assessment of obstructive sleep apnoea (OSA) was another limitation. Although  
4  
5 OSA is considered to be a male-dominated sleep disorder, postmenopausal OSA prevalence is  
6  
7 similar between males and females.[33] Moreover, excess weight is the primary cause of OSA  
8  
9 for most adults,[34] which would place this overweight/obese sample at even higher risk for  
10  
11 OSA. Evidence suggests that exercise, in the absence of more established treatments or  
12  
13 significant weight loss, is moderately efficacious at reducing OSA severity and improving  
14  
15 sleep.[35] However, dose-response effects of exercise on OSA severity are unknown.  
16  
17  
18

19  
20 Finally, because aerobic activity was the only mode of exercise studied in the DREW  
21  
22 trial, the possible effects of resistance exercise on sleep quality could not be examined in this  
23  
24 sample. Resistance training has been shown to improve sleep quality,[36] though there has been  
25  
26 minimal work comparing different doses of resistance exercise on sleep quality.[37]  
27  
28

## 29 **Conclusions**

30  
31 In summary, in a sample of overweight/obese postmenopausal women, exercise training  
32  
33 significantly reduced the odds of having significant sleep disturbance. These improvements in  
34  
35 sleep were independent of the effects of exercise training on body weight, parasympathetic tone,  
36  
37 or cardiorespiratory fitness. Additional research with more comprehensive measurement of sleep  
38  
39 is warranted, but exercise training appears to significantly improve sleep quality in  
40  
41 postmenopausal women.  
42  
43  
44  
45  
46  
47  
48  
49  
50  
51  
52  
53  
54  
55  
56  
57  
58  
59  
60

## ACKNOWLEDGMENTS

We thank the DREW participants and the Cooper Institute staff for their efforts on this study.

**Contributors:** TSC and SNB designed and organised the study. TSC, CPE, and SNB collected the data. CEK and XS performed the statistical analyses. CEK wrote the first draft of the manuscript. XS, MHH, SDY, CPE, SNB, and TSC provided critical input at all stages and critically reviewed and contributed to the final draft. CEK and TSC are guarantors.

**Funding:** This work was supported by grants HL66262 and T32 HL082610-05 from the National Institutes of Health, and American Heart Association Texas Affiliate award 02651404. Life Fitness (Schiller Park, Illinois) provided exercise equipment for this study.

**Competing interest statement:** All authors have completed the Unified Competing Interest form at [www.icmje.org/coi\\_disclosure.pdf](http://www.icmje.org/coi_disclosure.pdf) (available on request from the corresponding author) and declare: no support from any organisation for the submitted work (aside from the funding sources listed); no financial relationships with any organisations that might have an interest in the submitted work in the previous three years; and no other relationships or activities that could appear to have influenced the submitted work.

**Ethical approval:** Institutional Review Boards of the Cooper Institute (Dallas, TX) and the Pennington Biomedical Research Center (Baton Rouge, LA).

**Role of the study sponsors:** The sponsors had no role in the study design, protocol development, or in conducting the trial, data collection, data analysis, or preparation of the manuscript.

**Data sharing:** The data set will be available from the corresponding author as part of an academic collaboration.

**Trial registration:** Clinicaltrials.gov identification number NCT00011193.

## REFERENCES

1. Kravitz HM, Ganz PA, Bromberger J, et al. Sleep difficulty in women at midlife: a community survey of sleep and the menopausal transition. *Menopause* 2003;10:19-28.
2. National Institutes of Health. National Institutes of Health State-of-the-Science Conference statement: management of menopause-related symptoms. *Ann Intern Med* 2005;142:1003-13.
3. Buscemi N, Vandermeer B, Friesen C, et al. The efficacy and safety of drug treatments for chronic insomnia in adults: a meta-analysis of RCTs. *J Gen Intern Med* 2007;22:1335-50.
4. Nowakowski S, Meliska CJ, Martinez LF, et al. Sleep and menopause. *Curr Neurol Neurosci Rep* 2009;9:165-72.
5. Sarti CD, Chiantera A, Graziottin A, et al. Hormone therapy and sleep quality in women around menopause. *Menopause* 2005;12:545-51.
6. Kalleinen N, Polo O, Himanen SL, et al. The effect of estrogen plus progestin treatment on sleep: a randomized, placebo-controlled, double-blind trial in premenopausal and late postmenopausal women. *Climacteric* 2008;11:233-43.
7. Youngstedt SD, Kline CE. Epidemiology of exercise and sleep. *Sleep Biol Rhythms* 2006;4:215-21.
8. Youngstedt SD. Effects of exercise on sleep. *Clin Sports Med* 2005;24:355-65.
9. Tworoger SS, Yasui Y, Vitiello MV, et al. Effects of a yearlong moderate-intensity exercise and a stretching intervention on sleep quality in postmenopausal women. *Sleep* 2003;26:830-6.
10. Elavsky S, McAuley E. Lack of perceived sleep improvement after 4-month structured exercise programs. *Menopause* 2007;14:535-40.

- 1  
2  
3 11. Wilbur J, Miller AM, McDevitt J, et al. Menopausal status, moderate-intensity walking, and  
4 symptoms in midlife women. *Res Theory Nurs Pract* 2005;19:163-80.  
5  
6
- 7  
8 12. King AC, Oman RF, Brassington GS, et al. Moderate-intensity exercise and self-rated  
9 quality of sleep in older adults. A randomized controlled trial. *JAMA* 1997;277:32-7.  
10  
11
- 12 13. Morss GM, Jordan AN, Skinner JS, et al. Dose Response to Exercise in Women aged 45-75  
13 yr (DREW): design and rationale. *Med Sci Sports Exerc* 2004;36:336-44.  
14  
15
- 16 14. Church TS, Earnest CP, Skinner JS, et al. Effects of different doses of physical activity on  
17 cardiorespiratory fitness among sedentary, overweight or obese postmenopausal women  
18 with elevated blood pressure: a randomized controlled trial. *JAMA* 2007;297:2081-91.  
19  
20
- 21 15. NIH Consensus Development Panel on Physical Activity and Cardiovascular Health.  
22 Physical activity and cardiovascular health. *JAMA* 1996;276:241-6.  
23  
24
- 25 16. Hays RD, Stewart AL. Sleep measures. In: Stewart AL, Ware JE, Jr., eds. *Measuring*  
26 *Functioning and Well-being: The Medical Outcomes Study Approach*. Durham, NC: Duke  
27 University Press 1992:235-59.  
28  
29
- 30 17. Hays RD, Martin SA, Sesti AM, et al. Psychometric properties of the Medical Outcomes  
31 Study Sleep measure. *Sleep Med* 2005;6:41-4.  
32  
33
- 34 18. Allen RP, Kosinski M, Hill-Zabala CE, et al. Psychometric evaluation and tests of validity  
35 of the Medical Outcomes Study 12-item Sleep Scale (MOS sleep). *Sleep Med* 2009;10:531-  
36 9.  
37  
38
- 39 19. Earnest CP, Lavie CJ, Blair SN, et al. Heart rate variability characteristics in sedentary  
40 postmenopausal women following six months of exercise training: the DREW study. *PLoS*  
41 *One* 2008;3:e2288.  
42  
43  
44  
45  
46  
47  
48  
49  
50  
51  
52  
53  
54  
55  
56  
57  
58  
59  
60

- 1  
2  
3  
4  
5  
6  
7  
8  
9  
10  
11  
12  
13  
14  
15  
16  
17  
18  
19  
20  
21  
22  
23  
24  
25  
26  
27  
28  
29  
30  
31  
32  
33  
34  
35  
36  
37  
38  
39  
40  
41  
42  
43  
44  
45  
46  
47  
48  
49  
50  
51  
52  
53  
54  
55  
56  
57  
58  
59  
60
20. Task Force of the European Society of Cardiology and the North American Society of Pacing and Electrophysiology. Heart rate variability: standards of measurement, physiological interpretation, and clinical use. *Eur Heart J* 1996;17:354-81.
  21. Cohen J. *Statistical Power Analysis for the Behavioral Sciences*. 2<sup>nd</sup> ed. Philadelphia, PA: Lawrence Erlbaum Associates, Inc. 1988.
  22. Church TS, Martin CK, Thompson AM, et al. Changes in weight, waist circumference and compensatory responses with different doses of exercise among sedentary, overweight postmenopausal women. *PLoS One* 2009;4:e4515.
  23. Soares CN, Joffe H, Rubens R, et al. Eszopiclone in patients with insomnia during perimenopause and early postmenopause: a randomized controlled trial. *Obstet Gynecol* 2006;108:1402-10.
  24. Fogelholm M, Kronholm E, Kukkonen-Harjula K, et al. Sleep-related disturbances and physical inactivity are independently associated with obesity in adults. *Int J Obes (Lond)* 2007;31:1713-21.
  25. Dixon JB, Schachter LM, O'Brien PE. Sleep disturbance and obesity: changes following surgically induced weight loss. *Arch Intern Med* 2001;161:102-6.
  26. Bonnet MH, Arand DL. Heart rate variability in insomniacs and matched normal sleepers. *Psychosom Med*. 1998;60:610-5.
  27. Routledge FS, Campbell TS, Fetridge-Durdle JA, et al. Improvements in heart rate variability with exercise therapy. *Can J Cardiol* 2010;26:303-12.
  28. Lee AJ, Lin WH. Association between sleep quality and physical fitness in female young adults. *J Sports Med Phys Fitness* 2007;47:462-7.

- 1
  - 2
  - 3
  - 4
  - 5
  - 6
  - 7
  - 8
  - 9
  - 10
  - 11
  - 12
  - 13
  - 14
  - 15
  - 16
  - 17
  - 18
  - 19
  - 20
  - 21
  - 22
  - 23
  - 24
  - 25
  - 26
  - 27
  - 28
  - 29
  - 30
  - 31
  - 32
  - 33
  - 34
  - 35
  - 36
  - 37
  - 38
  - 39
  - 40
  - 41
  - 42
  - 43
  - 44
  - 45
  - 46
  - 47
  - 48
  - 49
  - 50
  - 51
  - 52
  - 53
  - 54
  - 55
  - 56
  - 57
  - 58
  - 59
  - 60
29. Buysse DJ, Reynolds CF III, Monk TH, et al. The Pittsburgh Sleep Quality Index: a new instrument for psychiatric practice and research. *Psychiatry Res* 1989;28:193-213.
30. Young T, Rabago D, Zgierska A, et al. Objective and subjective sleep quality in premenopausal, perimenopausal, and postmenopausal women in the Wisconsin Sleep Cohort Study. *Sleep* 2003;26:667-72.
31. Perlis ML, Smith MT, Andrews PJ, et al. Beta/Gamma EEG activity in patients with primary and secondary insomnia and good sleeper controls. *Sleep* 2001;24:110-7.
32. Baker FC, Wolfson AR, Lee KA. Association of sociodemographic, lifestyle, and health factors with sleep quality and daytime sleepiness in women: findings from the 2007 National Sleep Foundation "Sleep in America Poll". *J Womens Health* 2009;18:841-9.
33. Young T, Finn L, Austin D, et al. Menopausal status and sleep-disordered breathing in the Wisconsin Sleep Cohort Study. *Am J Respir Crit Care Med* 2003;167:1181-5.
34. Young T, Peppard PE, Taheri S. Excess weight and sleep-disordered breathing. *J Appl Physiol* 2005;99:1592-9.
35. Kline CE, Crowley EP, Ewing GB, et al. The effect of exercise training on obstructive sleep apnea and sleep quality: a randomized controlled trial. *Sleep* 2011;34:1631-40.
36. Singh NA, Clements KM, Fiatarone MA. A randomized controlled trial of the effect of exercise on sleep. *Sleep* 1997;20:95-101.
37. Singh NA, Stavrinou TM, Scarbek Y, et al. A randomized controlled trial of high versus low intensity weight training versus general practitioner care for clinical depression in older adults. *J Gerontol A Biol Sci Med Sci* 2005;60:768-76.



**FIGURE LEGENDS**

**Figure 1.** *Participant screening and study flow.* Of 4545 screened for participation, 464 postmenopausal women were randomised to one of four treatments. Baseline MOS Sleep data were available for 437 participants; those who discontinued the study or without follow-up MOS Sleep data had baseline data carried forward for analysis. BMI: body mass index; KKW: kilocalories of energy expenditure per kilogram of body weight per week; MOS: Medical Outcomes Study.

**Figure 2.** *Change in MOS Sleep Problems Index scores among treatment groups.* Data presented as least-squares means  $\pm$  95% confidence intervals. Analyses adjusted for age, BMI, sleep medication use, hormone replacement therapy use, and baseline MOS SPI score. \* Indicates difference from control ( $P = .02$ ). KKW: kilocalories of energy expenditure per kilogram of body weight per week; MOS: Medical Outcomes Study.

## TABLES

**Table 1. Baseline Participant Characteristics.**

|                                          | All<br>(N=437) | Control<br>(n=92) | Exercise Groups  |                 |                  |
|------------------------------------------|----------------|-------------------|------------------|-----------------|------------------|
|                                          |                |                   | 4 KKW<br>(n=151) | 8 KKW<br>(n=99) | 12 KKW<br>(n=95) |
| Age, y                                   | 57.32 (6.46)   | 57.14 (5.91)      | 57.78 (6.53)     | 57.58 (6.63)    | 56.47 (6.72)     |
| Education, y                             | 14.03 (2.11)   | 14.01 (2.12)      | 13.80 (2.02)     | 14.37 (2.06)    | 14.00 (2.28)     |
| Married, No. (%)                         | 398 (91)       | 86 (93)           | 141 (94)         | 87 (88)         | 84 (88)          |
| Ethnicity/race, No. (%)                  |                |                   |                  |                 |                  |
| White                                    | 278 (64)       | 58 (63)           | 92 (61)          | 60 (61)         | 68 (72)          |
| African-American                         | 128 (29)       | 23 (25)           | 49 (32)          | 32 (32)         | 24 (25)          |
| Hispanic/Other                           | 31 (7)         | 11 (12)           | 10 (7)           | 7 (7)           | 3 (3)            |
| Employed, No. (%)                        | 304 (70)       | 62 (67)           | 105 (70)         | 67 (68)         | 70 (74)          |
| Cigarette Smoking, No. (%)               | 25 (6)         | 5 (5)             | 8 (5)            | 4 (4)           | 8 (8)            |
| Medication Use, No. (%)                  |                |                   |                  |                 |                  |
| Antihypertensive                         | 126 (29)       | 22 (24)           | 41 (27)          | 32 (32)         | 31 (33)          |
| Hyperlipidemia                           | 73 (17)        | 14 (15)           | 31 (21)          | 17 (17)         | 11 (12)          |
| Thyroid                                  | 65 (15)        | 12 (13)           | 19 (13)          | 16 (16)         | 18 (19)          |
| Antidepressant                           | 78 (18)        | 16 (17)           | 28 (19)          | 18 (18)         | 16 (17)          |
| HRT                                      | 202 (46)       | 48 (52)           | 67 (44)          | 43 (43)         | 44 (46)          |
| Antianxiety                              | 20 (5)         | 7 (8)             | 7 (5)            | 4 (4)           | 2 (2)            |
| Sedatives/sleep aids                     | 12 (3)         | 4 (4)             | 5 (3)            | 3 (3)           | 0 (0)            |
| Energy Intake, kcal/d                    | 2277.2 (952.6) | 2277.4 (947.9)    | 2213.1 (941.6)   | 2290.7 (930.7)  | 2364.7 (1003.5)  |
| Anthropometrics                          |                |                   |                  |                 |                  |
| Weight, kg                               | 84.46 (11.82)  | 85.77 (12.43)     | 83.56 (11.42)    | 84.74 (12.43)   | 84.33 (11.24)    |
| Body mass index, kg/m <sup>2</sup>       | 31.77 (3.85)   | 32.29 (3.94)      | 31.54 (3.80)     | 31.98 (4.08)    | 31.44 (3.58)     |
| Cardiorespiratory Fitness                |                |                   |                  |                 |                  |
| Relative VO <sub>2peak</sub> , mL/kg/min | 15.37 (2.92)   | 15.56 (3.00)      | 15.44 (3.00)     | 14.70 (2.49)    | 15.77 (3.05)     |
| Absolute VO <sub>2peak</sub> , L/min     | 1.29 (0.26)    | 1.33 (0.28)       | 1.28 (0.24)      | 1.24 (0.24)     | 1.32 (0.26)      |
| Heart Rate Variability <sup>*</sup>      |                |                   |                  |                 |                  |
| rMSSD, ms                                | 22.83 (11.56)  | 23.35 (11.01)     | 23.58 (12.24)    | 23.25 (11.29)   | 20.68 (11.19)    |
| Subjective Sleep Quality                 |                |                   |                  |                 |                  |
| MOS Sleep Problems Index                 | 27.92 (18.40)  | 28.37 (19.71)     | 27.03 (17.92)    | 27.35 (18.10)   | 29.47 (18.32)    |
| Sleep disturbance, No. (%)               | 200 (46)       | 38 (41)           | 65 (43)          | 49 (49)         | 48 (51)          |

Data presented as mean (standard deviation) unless otherwise indicated. \* Samples for rMSSD

data were 351, 79, 123, 73, and 76 participants for All, Control, 4 KKW, 8 KKW, and 12 KKW groups, respectively. Abbreviations: HRT: hormone replacement therapy; KKW: kilocalories of energy expenditure per kilogram of body weight per week; MOS: Medical Outcomes Study; rMSSD: square root of the mean of the sum of the squares of differences between adjacent R-R intervals; VO<sub>2peak</sub>: peak rate of oxygen consumption.

**Table 2.** Associations Between Baseline Sleep Quality and BMI, Parasympathetic Tone, and Cardiorespiratory Fitness.

| Variable                              | MOS SPI score (95% CI) | OR of MOS SPI > 25 (95% CI) |
|---------------------------------------|------------------------|-----------------------------|
| <b>BMI (kg/m<sup>2</sup>)</b>         |                        |                             |
| Q1: ≥ 34.7                            | 27.95 (24.54, 31.36)   | 1.00 (referent)             |
| Q2: 31.7 - < 34.7                     | 24.37 (20.92, 27.82)   | 0.60 (0.35, 1.03)           |
| Q3: 28.6 - < 31.7                     | 30.48 (27.03, 33.94)   | 1.14 (0.67, 1.96)           |
| Q4: < 28.6                            | 28.85 (25.46, 32.24)   | 0.98 (0.58, 1.68)           |
| Linear <i>P</i>                       | .26                    | .53                         |
| <b>rMSSD (ms)</b>                     |                        |                             |
| Q1: < 15.0                            | 31.77 (27.95, 35.59)   | 1.00 (referent)             |
| Q2: 15.0 - < 20.9                     | 24.77 (21.04, 28.51)*  | 0.53 (0.29, 0.97)           |
| Q3: 20.9 - < 29.0                     | 25.22 (21.36, 29.09)*  | 0.43 (0.23, 0.81)           |
| Q4: ≥ 29.0                            | 26.50 (22.64, 30.35)*  | 0.46 (0.25, 0.86)           |
| Linear <i>P</i>                       | .08                    | .01                         |
| <b>VO<sub>2peak</sub> (mL/kg/min)</b> |                        |                             |
| Q1: < 13.4                            | 29.55 (25.86, 33.25)   | 1.00 (referent)             |
| Q2: 13.4 - < 15.2                     | 28.80 (25.35, 32.25)   | 1.22 (0.70, 2.13)           |
| Q3: 15.2 - < 17.0                     | 28.60 (25.05, 32.15)   | 1.04 (0.58, 1.87)           |
| Q4: ≥ 17.0                            | 24.91 (21.41, 28.42)   | 0.63 (0.34, 1.14)           |
| Linear <i>P</i>                       | .10                    | .09                         |

Continuous baseline MOS SPI scores (left panels) and odds ratios of having significant sleep disturbance at baseline (MOS SPI > 25) (right panels) across quartiles of baseline BMI, rMSSD, and VO<sub>2peak</sub>. All analyses adjusted for age, BMI, sleep medication use, and HRT use, except when the covariate quartile was the independent variable. \* indicates significant difference ( $P \leq .05$ ) in MOS SPI score compared to quartile 1 (referent group). Abbreviations: BMI: body mass index; CI: confidence interval; MOS: Medical Outcomes Study; Q: quartile; rMSSD: square root of the mean of the sum of the squares of differences between adjacent R-R intervals; SPI: Sleep Problems Index; VO<sub>2peak</sub>: peak rate of oxygen consumption.

**Table 3.** Prevalence and Odds of Significant Sleep Disturbance (i.e., MOS SPI > 25) at Post-Intervention.

|                            | Prevalence   | Model 1           | Model 2           | Model 3           | Model 4           |
|----------------------------|--------------|-------------------|-------------------|-------------------|-------------------|
|                            | <i>n</i> (%) | OR (95% CI)       | OR (95% CI)       | OR (95% CI)       | OR (95% CI)       |
| Control                    | 41 (45%)     | 1.00 (referent)   | 1.00 (referent)   | 1.00 (referent)   | 1.00 (referent)   |
| 4 KKW                      | 46 (31%)     | 0.37 (0.19, 0.73) | 0.37 (0.19, 0.73) | 0.34 (0.19, 0.73) | 0.37 (0.19, 0.73) |
| 8 KKW                      | 33 (33%)     | 0.36 (0.17, 0.77) | 0.36 (0.17, 0.77) | 0.32 (0.17, 0.77) | 0.36 (0.17, 0.77) |
| 12 KKW                     | 31 (33%)     | 0.34 (0.16, 0.72) | 0.34 (0.16, 0.72) | 0.28 (0.16, 0.72) | 0.34 (0.16, 0.72) |
| Linear trend <i>P</i>      |              | .01               | .01               | .006              | .02               |
| Weight change              |              | ---               | 1.00 (0.93, 1.08) | ---               | ---               |
| VO <sub>2peak</sub> change |              | ---               | ---               | 1.10 (0.95, 1.26) | ---               |
| rMSSD change               |              | ---               | ---               | ---               | 1.01 (0.98, 1.04) |

Model 1 adjusted for age, BMI, sleep medication use, hormone replacement therapy use, and

baseline sleep quality (SPI ≤ 25, SPI > 25); Model 2 adjusted for change in body weight in

addition to variables included in Model 1; Model 3 adjusted for change in VO<sub>2peak</sub> in addition to

variables included in Model 1; Model 4 adjusted for change in rMSSD in addition to variables

included in Model 1. Abbreviations: CI: confidence interval; KKW: kilocalories of energy

expenditure per kilogram of body weight per week; OR: odds ratio; rMSSD: square root of the

mean of the sum of the squares of differences between adjacent R-R intervals; VO<sub>2peak</sub>: peak rate

of oxygen consumption.

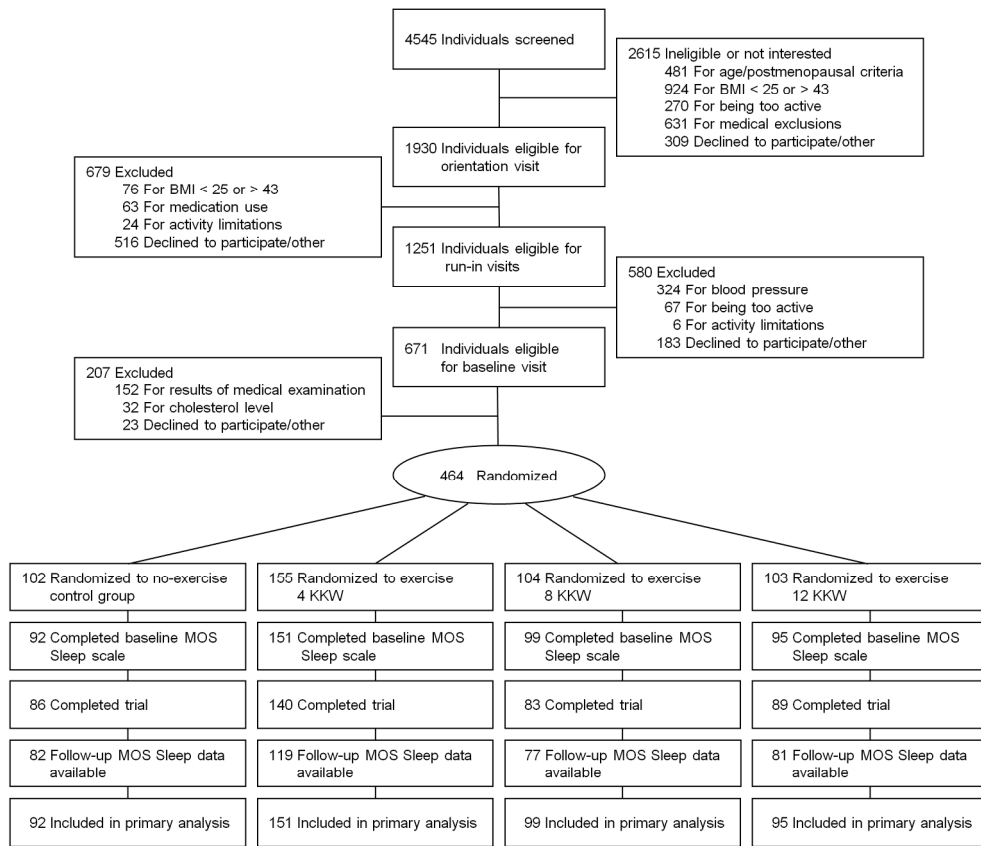

Figure 1. Participant screening and study flow. Of 4545 screened for participation, 464 postmenopausal women were randomised to one of four treatments. Baseline MOS Sleep data were available for 437 participants; those who discontinued the study or without follow-up MOS Sleep data had baseline data carried forward for analysis. BMI: body mass index; KKW: kilocalories of energy expenditure per kilogram of body weight per week; MOS: Medical Outcomes Study.  
215x187mm (279 x 279 DPI)

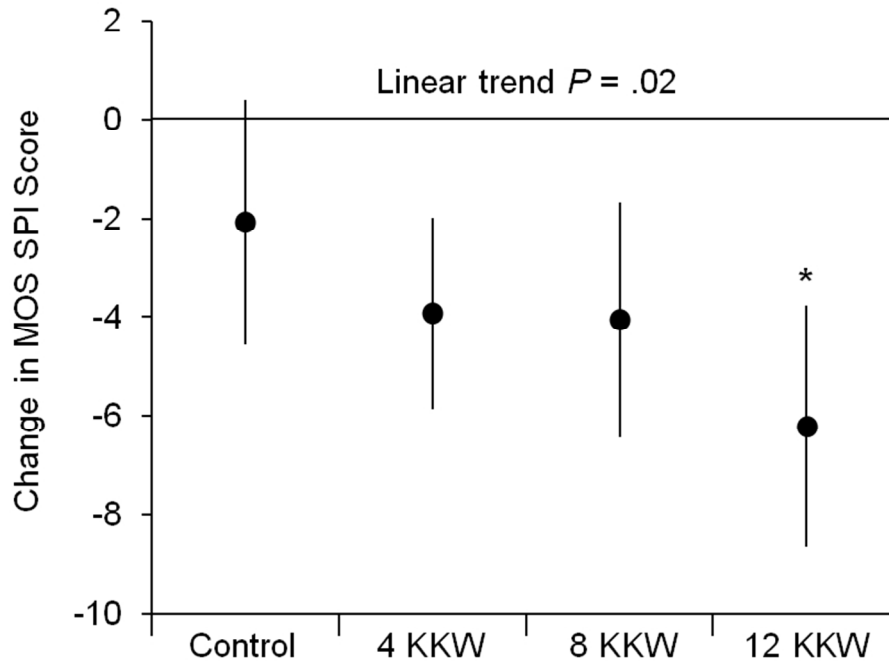

Figure 2. Change in MOS Sleep Problems Index scores among treatment groups. Data presented as least-squares means  $\pm$  95% confidence intervals. Analyses adjusted for age, BMI, sleep medication use, hormone replacement therapy use, and baseline MOS SPI score. \* Indicates difference from control ( $P = .02$ ). KKW: kilocalories of energy expenditure per kilogram of body weight per week; MOS: Medical Outcomes Study. 82x65mm (279 x 279 DPI)

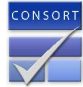

## CONSORT 2010 checklist of information to include when reporting a randomised trial\*

| Section/Topic                    | Item No | Checklist item                                                                                                                                                                              | Reported on page No |
|----------------------------------|---------|---------------------------------------------------------------------------------------------------------------------------------------------------------------------------------------------|---------------------|
| <b>Title and abstract</b>        |         |                                                                                                                                                                                             |                     |
|                                  | 1a      | Identification as a randomised trial in the title                                                                                                                                           | p.1                 |
|                                  | 1b      | Structured summary of trial design, methods, results, and conclusions (for specific guidance see CONSORT for abstracts)                                                                     | pp. 2-3             |
| <b>Introduction</b>              |         |                                                                                                                                                                                             |                     |
| Background and objectives        | 2a      | Scientific background and explanation of rationale                                                                                                                                          | pp. 5-6             |
|                                  | 2b      | Specific objectives or hypotheses                                                                                                                                                           | p. 6                |
| <b>Methods</b>                   |         |                                                                                                                                                                                             |                     |
| Trial design                     | 3a      | Description of trial design (such as parallel, factorial) including allocation ratio                                                                                                        | p. 6, p. 10         |
|                                  | 3b      | Important changes to methods after trial commencement (such as eligibility criteria), with reasons                                                                                          | NA                  |
| Participants                     | 4a      | Eligibility criteria for participants                                                                                                                                                       | pp. 6-7             |
|                                  | 4b      | Settings and locations where the data were collected                                                                                                                                        | p. 6                |
| Interventions                    | 5       | The interventions for each group with sufficient details to allow replication, including how and when they were actually administered                                                       | pp. 7-8             |
| Outcomes                         | 6a      | Completely defined pre-specified primary and secondary outcome measures, including how and when they were assessed                                                                          | pp. 8-10            |
|                                  | 6b      | Any changes to trial outcomes after the trial commenced, with reasons                                                                                                                       | NA                  |
| Sample size                      | 7a      | How sample size was determined                                                                                                                                                              | p. 10               |
|                                  | 7b      | When applicable, explanation of any interim analyses and stopping guidelines                                                                                                                | NA                  |
| <b>Randomisation:</b>            |         |                                                                                                                                                                                             |                     |
| Sequence generation              | 8a      | Method used to generate the random allocation sequence                                                                                                                                      | p. 7                |
|                                  | 8b      | Type of randomisation; details of any restriction (such as blocking and block size)                                                                                                         | p. 7                |
| Allocation concealment mechanism | 9       | Mechanism used to implement the random allocation sequence (such as sequentially numbered containers), describing any steps taken to conceal the sequence until interventions were assigned | p. 7                |
| Implementation                   | 10      | Who generated the random allocation sequence, who enrolled participants, and who assigned participants to interventions                                                                     | p. 7                |
| Blinding                         | 11a     | If done, who was blinded after assignment to interventions (for example, participants, care providers, those                                                                                | p. 8                |

|    |                          |                                                                                                                     |                      |
|----|--------------------------|---------------------------------------------------------------------------------------------------------------------|----------------------|
| 1  |                          |                                                                                                                     |                      |
| 2  |                          | assessing outcomes) and how                                                                                         |                      |
| 3  |                          |                                                                                                                     |                      |
| 4  |                          | 11b If relevant, description of the similarity of interventions                                                     | p. 7                 |
| 5  | Statistical methods      | 12a Statistical methods used to compare groups for primary and secondary outcomes                                   | pp. 10-11            |
| 6  |                          | 12b Methods for additional analyses, such as subgroup analyses and adjusted analyses                                | pp. 10-11            |
| 7  |                          |                                                                                                                     |                      |
| 8  | <b>Results</b>           |                                                                                                                     |                      |
| 9  | Participant flow (a      | 13a For each group, the numbers of participants who were randomly assigned, received intended treatment,            |                      |
| 10 | diagram is strongly      | and were analysed for the primary outcome                                                                           | p. 12; Fig. 1        |
| 11 | recommended)             | 13b For each group, losses and exclusions after randomisation, together with reasons                                | Fig. 1               |
| 12 | Recruitment              | 14a Dates defining the periods of recruitment and follow-up                                                         | p. 6                 |
| 13 |                          | 14b Why the trial ended or was stopped                                                                              | NA                   |
| 14 |                          |                                                                                                                     |                      |
| 15 | Baseline data            | 15 A table showing baseline demographic and clinical characteristics for each group                                 | p. 12, Table 1       |
| 16 | Numbers analysed         | 16 For each group, number of participants (denominator) included in each analysis and whether the analysis          |                      |
| 17 |                          | was by original assigned groups                                                                                     | p.11, Fig. 1         |
| 18 |                          |                                                                                                                     |                      |
| 19 | Outcomes and             | 17a For each primary and secondary outcome, results for each group, and the estimated effect size and its           | p. 13, Fig. 2, Table |
| 20 | estimation               | precision (such as 95% confidence interval)                                                                         | 3                    |
| 21 |                          | 17b For binary outcomes, presentation of both absolute and relative effect sizes is recommended                     | p. 13, Table 3       |
| 22 | Ancillary analyses       | 18 Results of any other analyses performed, including subgroup analyses and adjusted analyses,                      |                      |
| 23 |                          | distinguishing pre-specified from exploratory                                                                       | pp. 13-14            |
| 24 |                          |                                                                                                                     |                      |
| 25 | Harms                    | 19 All important harms or unintended effects in each group (for specific guidance see CONSORT for harms)            | NA                   |
| 26 |                          |                                                                                                                     |                      |
| 27 | <b>Discussion</b>        |                                                                                                                     |                      |
| 28 | Limitations              | 20 Trial limitations, addressing sources of potential bias, imprecision, and, if relevant, multiplicity of analyses | pp. 16-18            |
| 29 | Generalisability         | 21 Generalisability (external validity, applicability) of the trial findings                                        | p. 15, pp. 17-18     |
| 30 | Interpretation           | 22 Interpretation consistent with results, balancing benefits and harms, and considering other relevant evidence    | pp. 14-15            |
| 31 |                          |                                                                                                                     |                      |
| 32 | <b>Other information</b> |                                                                                                                     |                      |
| 33 | Registration             | 23 Registration number and name of trial registry                                                                   | p. 3, p. 20          |
| 34 | Protocol                 | 24 Where the full trial protocol can be accessed, if available                                                      | p. 6, Ref. 13        |
| 35 | Funding                  | 25 Sources of funding and other support (such as supply of drugs), role of funders                                  | pp. 19-20            |
| 36 |                          |                                                                                                                     |                      |

\*We strongly recommend reading this statement in conjunction with the CONSORT 2010 Explanation and Elaboration for important clarifications on all the items. If relevant, we also recommend reading CONSORT extensions for cluster randomised trials, non-inferiority and equivalence trials, non-pharmacological treatments, herbal interventions, and pragmatic trials. Additional extensions are forthcoming: for those and for up to date references relevant to this checklist, see [www.consort-statement.org](http://www.consort-statement.org).





**Dose-Response Effects of Exercise Training on the Subjective Sleep Quality of Postmenopausal Women: Exploratory Analyses of a Randomised Controlled Trial**

|                                 |                                                                                                                                                                                                                                                                                                                                                                                                                                                                                                                                                 |
|---------------------------------|-------------------------------------------------------------------------------------------------------------------------------------------------------------------------------------------------------------------------------------------------------------------------------------------------------------------------------------------------------------------------------------------------------------------------------------------------------------------------------------------------------------------------------------------------|
| Journal:                        | <i>BMJ Open</i>                                                                                                                                                                                                                                                                                                                                                                                                                                                                                                                                 |
| Manuscript ID:                  | bmjopen-2012-001044.R1                                                                                                                                                                                                                                                                                                                                                                                                                                                                                                                          |
| Article Type:                   | Research                                                                                                                                                                                                                                                                                                                                                                                                                                                                                                                                        |
| Date Submitted by the Author:   | 27-May-2012                                                                                                                                                                                                                                                                                                                                                                                                                                                                                                                                     |
| Complete List of Authors:       | Kline, Christopher; University of Pittsburgh School of Medicine, Department of Psychiatry<br>Sui, Xuemi; University of South Carolina, Exercise Science Hall, Martica; University of Pittsburgh School of Medicine, Department of Psychiatry<br>Youngstedt, Shawn; University of South Carolina, Department of Exercise Science<br>Blair, Steven; Univ South Carolina, Dept of Exercise Science<br>Earnest, Conrad; University of Bath, Department for Health<br>Church, Timothy; Louisiana State University, Department of Preventive Medicine |
| <b>Primary Subject Heading</b>: | Public health                                                                                                                                                                                                                                                                                                                                                                                                                                                                                                                                   |
| Secondary Subject Heading:      | Sports and exercise medicine, Mental health                                                                                                                                                                                                                                                                                                                                                                                                                                                                                                     |
| Keywords:                       | sleep, exercise, postmenopausal, exercise training                                                                                                                                                                                                                                                                                                                                                                                                                                                                                              |
|                                 |                                                                                                                                                                                                                                                                                                                                                                                                                                                                                                                                                 |

SCHOLARONE™  
Manuscripts

1  
2  
3 **Dose-Response Effects of Exercise Training on the Subjective Sleep Quality of**  
4  
5 **Postmenopausal Women: Exploratory Analyses of a Randomised Controlled Trial**  
6  
7  
8  
9

10 Christopher E. Kline,<sup>1</sup> Xuemei Sui,<sup>2</sup> Martica Hall,<sup>1</sup> Shawn D. Youngstedt,<sup>2,3,4</sup>

11  
12 Steven N. Blair,<sup>2,5</sup> Conrad P. Earnest,<sup>6</sup> Timothy S. Church<sup>7</sup>  
13  
14  
15  
16

17 <sup>1</sup> *Department of Psychiatry, University of Pittsburgh School of Medicine, Pittsburgh, PA USA;*

18 <sup>2</sup> *Department of Exercise Science, University of South Carolina, Columbia, SC USA;*

19 <sup>3</sup> *WJB Dorn VA Medical Center, Columbia, SC USA;*

20 <sup>4</sup> *Department of Psychology, University of South Carolina, Columbia, SC USA;*

21 <sup>5</sup> *Department of Epidemiology and Biostatistics, University of South Carolina, Columbia, SC*

22  
23  
24  
25  
26  
27  
28  
29  
30  
31  
32  
33  
34  
35  
36  
37  
38  
39  
40  
41  
42  
43  
44  
45  
46  
47  
48  
49  
50  
51  
52  
53  
54  
55  
56  
57  
58  
59  
60  
*USA;*

<sup>6</sup> *Department for Health, University of Bath, Bath, UK;*

<sup>7</sup> *Department of Preventive Medicine, Pennington Biomedical Research Center, Louisiana State  
University, Baton Rouge, LA USA.*

**Corresponding Author:** Christopher E. Kline, Ph.D., Department of Psychiatry, University of

Pittsburgh School of Medicine, 3811 O'Hara Street, Pittsburgh, PA 15213; tel.: 412-578-

9554; fax: 412-246-5300; e-mail: klinec@upmc.edu.

**Key words:** exercise, sleep, postmenopausal, exercise training

**Main text word count:** 3755

## ABSTRACT

**Objective:** To investigate whether a dose-response relationship existed between exercise and subjective sleep quality in postmenopausal women. This objective represents a post-hoc assessment which was not previously considered.

**Design:** Parallel group randomised controlled trial.

**Setting:** Clinical exercise physiology laboratory in Dallas, Texas.

**Participants:** 437 sedentary overweight/obese postmenopausal women.

**Intervention:** Participants were randomised to 1 of 4 treatments, each of 6 months' duration: a non-exercise control treatment ( $n=92$ ) or one of three dosages of moderate-intensity exercise (50% of  $VO_{2peak}$ ), designed to meet 50% ( $n=151$ ), 100% ( $n=99$ ), or 150% ( $n=95$ ) of NIH Consensus Development Panel physical activity recommendations. Exercise dosages were structured to elicit energy expenditures of 4, 8 or 12 kilocalories per kilogram of body weight per week (KKW), respectively. Analyses were intent-to-treat.

**Primary outcome measures:** Continuous scores and odds of having significant sleep disturbance, as assessed by the Sleep Problems Index from the 6-item Medical Outcomes Study (MOS) Sleep Scale. Outcome assessors were blinded to participant randomisation assignment.

**Results:** Change in the MOS Sleep Problems Index score significantly differed by treatment group (control: -2.09 [95% confidence interval, -4.58 to 0.40], 4 KKW: -3.93 [-5.87 to -1.99], 8 KKW: -4.06 [-6.45 to -1.67], 12 KKW: -6.22 [-8.68 to -3.77];  $P=.04$ ), with a significant dose-response trend observed ( $P=.02$ ). Exercise training participants had lower odds of having significant sleep disturbance at post-intervention compared to control (4 KKW OR: 0.37 [0.19 to 0.73], 8 KKW: 0.36 [0.17 to 0.77], 12 KKW: 0.34 [0.16 to 0.72]). The magnitude of weight loss

1  
2  
3 did not differ between treatment conditions. Improvements in sleep quality were not related to  
4  
5 changes in body weight, resting parasympathetic control, or cardiorespiratory fitness.  
6  
7

8 **Conclusion:** Exercise training induced significant improvement in subjective sleep quality in  
9  
10 postmenopausal women, with even a low dose of exercise resulting in greatly reduced odds of  
11  
12 having significant sleep disturbance.  
13

14  
15 **Trial registration:** [clinicaltrials.gov](https://clinicaltrials.gov) identifier: NCT00011193.  
16  
17  
18  
19  
20  
21  
22  
23  
24  
25  
26  
27  
28  
29  
30  
31  
32  
33  
34  
35  
36  
37  
38  
39  
40  
41  
42  
43  
44  
45  
46  
47  
48  
49  
50  
51  
52  
53  
54  
55  
56  
57  
58  
59  
60

## ARTICLE SUMMARY

### Article Focus:

- Sleep disturbance is prevalent in postmenopausal women, with 35-60% reporting significant sleep problems.
- Effective, safe and easily available treatment options for disturbed sleep in postmenopausal women are lacking.
- There has been equivocal evidence as to whether exercise improves sleep in postmenopausal women, though possible dose-response effects have been noted.

### Key Messages:

- Exercise resulted in significant improvement in subjective sleep quality in postmenopausal women, with reduced odds of having sleep disturbance at post-intervention with even 50% of the recommended dose of exercise for adults.
- The effects of exercise on sleep quality were independent of changes in body weight, resting parasympathetic control, or cardiorespiratory fitness.

### Strengths and Limitations:

- The study constitutes the largest randomised controlled trial on exercise and sleep quality, using a structured dose of exercise and a validated measure of sleep quality.
- Only self-reported sleep was assessed; objective measurement of sleep, with either actigraphy or polysomnography, was not conducted.
- Despite the high prevalence of sleep disturbance in the sample, participants were not selected on the basis of sleep complaints.

## INTRODUCTION

Disturbed sleep is a common complaint among women, with increasing prevalence beginning at the menopausal transition. Postmenopausal women are more likely to report sleep problems than premenopausal or perimenopausal women,[1] with 35-60% of postmenopausal women reporting significant sleep problems.[2] The first-line treatment options for sleep complaints, hypnotic medication and cognitive behavioral therapy, have associated concerns about the safety of long-term use or treatment availability, respectively.[3,4] Furthermore, results are conflicting on the effect of hormone replacement therapy (HRT) on sleep quality,[5,6] despite the effectiveness of HRT at reducing other menopausal symptoms.

A nonpharmacological treatment that has been traditionally thought to improve sleep is exercise. In epidemiologic research, exercise has frequently been associated with better sleep.[7] However, experimental research has provided less compelling evidence,[8] particularly when regarding postmenopausal women. Of the four randomised trials that have investigated the effect of exercise on sleep quality in this population,[9-12] only one reported a significant improvement in subjective sleep quality following an exercise intervention.[12] However, despite the generally negative findings from these studies involving postmenopausal women, possible dose-response effects of exercise on sleep quality were noted. In one of these studies, women who performed at least 225 minutes of morning exercise per week had less trouble falling asleep compared to those who exercised less than 180 minutes per week in the morning.[9] Likewise, another study reported a positive association between walking frequency and improvements in sleep.[11]

To our knowledge, no research has directly investigated the effects of different doses of exercise on sleep quality. The Dose-Response to Exercise in postmenopausal Women (DREW) trial was conducted to investigate the health effects of 50%, 100%, and 150% of the NIH

1  
2  
3 Consensus Development Panel physical activity recommendations in a group of sedentary  
4  
5 postmenopausal women.[13] Results on the primary outcomes of the study, cardiorespiratory  
6  
7 fitness and blood pressure, have already been reported.[14] Subjective sleep quality was also  
8  
9 assessed in this trial as an exploratory outcome, and the data provided herein provides the first  
10  
11 systematic examination of whether a dose-response relationship exists between exercise and  
12  
13 subjective sleep quality. It was hypothesised that, in comparison to a non-exercise control group,  
14  
15 subjective sleep quality would improve with increasing dosage of exercise.  
16  
17  
18

## 19 20 METHODS

21  
22 A complete description of the recruitment and screening procedures has been published  
23  
24 elsewhere.[13] Briefly, the study was a randomised, controlled, multi-arm parallel group trial in  
25  
26 which the primary outcomes were examining whether there were dose-response effects on  
27  
28 cardiorespiratory fitness and blood pressure with incrementally increasing doses of energy  
29  
30 expenditure.[13,14] The study was approved annually by the Cooper Institute Institutional  
31  
32 Review Board, and written informed consent was obtained by all participants prior to study  
33  
34 involvement.  
35  
36  
37

### 38 39 Participants

40  
41 Participants were recruited from the Dallas, Texas, metropolitan area from April 2001 to  
42  
43 June 2005. Of 4545 women screened for eligibility, those who were aged 45-75 years,  
44  
45 postmenopausal, sedentary ( $\leq 20$  min of exercise on  $\leq 2$  days/week and  $< 8000$  steps/day,  
46  
47 averaged over one week), overweight or obese (body mass index [BMI] of 25-43 kg/m<sup>2</sup>), and  
48  
49 had normal to mildly elevated resting blood pressure (systolic blood pressure [SBP] of 120-159  
50  
51 mm Hg and diastolic blood pressure [DBP]  $\leq 99$  mm Hg) were eligible to participate (Figure 1).  
52  
53 Exclusion criteria included significant cardiovascular disease, recent hospitalisation for mental  
54  
55  
56  
57  
58  
59  
60

1  
2  
3 illness or significant symptoms of depression (score  $\geq 10$  on the Center for Epidemiologic  
4  
5 Studies Depression scale), or any other health condition that would contraindicate participation  
6  
7  
8 in an exercise program. Overall, 464 women were randomised to treatment, with baseline sleep  
9  
10 data available for 437 participants.

### 11 12 **Randomisation and Retention**

13  
14  
15 Prior to randomisation, participants completed a two-week run-in period, in which  
16  
17 participants received lifestyle modification instruction over the course of six laboratory visits.  
18  
19 The primary purpose of this run-in period was to maximise retention and adherence to the  
20  
21 subsequent intervention. Participants were compensated for completing baseline and post-  
22  
23 intervention assessments, with additional compensation based on intervention adherence.[13]  
24  
25  
26

27 Allocation of participants to treatment conditions was accomplished using a computer-  
28  
29 generated randomisation sequence, determined from randomly permuted blocks of equal length  
30  
31 with fixed numbers of treatment allotments to balance treatment enrollments over time.

32  
33 Allocation concealment was achieved by placing treatment assignment letters into sequentially  
34  
35 numbered opaque envelopes sealed by the study statistician. At the time of randomisation,  
36  
37 envelopes were opened by a staff member not affiliated with the randomisation process.[13]  
38  
39  
40

41 Participants were randomised to one of four treatment conditions: a non-exercise control  
42  
43 group, or one of three exercise groups expending 4, 8, or 12 kilocalories per kilogram of body  
44  
45 weight per week (KKW). Energy expenditure levels for the exercise groups were designed to  
46  
47 correspond with 50%, 100%, and 150% of the NIH Consensus Development Panel physical  
48  
49 activity recommendations, respectively.[15]  
50  
51  
52

### 53 **Interventions**

54  
55  
56  
57  
58  
59  
60



1  
2  
3 Women assigned to the exercise groups participated in 3-4 training sessions/week for 6  
4 months, alternating between semirecumbent cycle ergometer and treadmill exercise. Training  
5 sessions were conducted in a supervised laboratory setting, and exercise dosage was closely  
6 monitored for each session. Training intensity was moderate, set at the heart rate associated with  
7 50% of each woman's  $VO_{2peak}$  and continuously monitored by heart rate telemetry. To determine  
8 the number of calories that needed to be expended each week, participants were weighed weekly  
9 and their weight was multiplied by the exercise dosage.  
10  
11  
12  
13  
14  
15  
16  
17  
18

19  
20 Exercise dose was gradually increased to minimise injury risk. All exercise training  
21 groups expended 4 KKW during the first intervention week, with the 4-KKW group continuing  
22 at that dose for 6 months. The 8- and 12-KKW groups increased their energy expenditure by 1  
23 KKW until they reached their appointed exercise doses.  
24  
25  
26  
27  
28

### 29 **Blinding**

30  
31 Although participants could not be blinded to their treatment, staff were separated into  
32 intervention and assessment teams to ensure blinding of all assessment staff to participant  
33 randomisation assignment. Participants were consistently reminded to refrain from discussing  
34 their randomisation assignments with outcome assessment staff.  
35  
36  
37  
38  
39  
40

### 41 **Sleep Measure**

42  
43 Subjective sleep quality was assessed with six items from the Medical Outcomes Study  
44 (MOS) Sleep Scale.[16] At baseline and post-intervention, participants were asked to respond  
45 based on their sleep during the previous four weeks. One question, which addressed the length of  
46 time to fall asleep, was framed with five response options ranging from 0-15 minutes to > 60  
47 minutes. For the remaining five questions (i.e., restless sleep, daytime drowsiness, difficulty  
48 falling asleep, awakening from sleep and experiencing difficulty returning to sleep, staying  
49  
50  
51  
52  
53  
54  
55  
56  
57  
58  
59  
60

1  
2  
3 awake during the day), participants were asked to respond on a 5-point scale, ranging from “none  
4 of the time” to “all of the time”. Item responses were assigned scores using conventional scoring  
5 rules, with higher scores indicating a greater severity of sleep disturbance. A modified Sleep  
6 Problems Index (SPI), utilising all six sleep items, provided a measure of overall sleep  
7 quality.[17] SPI scores greater than 25 were considered to indicate significant sleep disturbance,  
8 as prior work utilising a 9-item SPI reported that a cutpoint of > 25 identified individuals who  
9 considered themselves to have a sleep problem with a sensitivity of 86.2% and specificity of  
10 66.3%.[17]

11  
12 Scores on the MOS Sleep Scale have been shown to correlate with other MOS health  
13 items,[16] differentiate between those with and without chronic health conditions,[17] and  
14 improve with treatment of chronic health conditions.[18] Normative values for the general  
15 population have also been developed.[17]

### 31 **Other Measures**

32  
33  
34 Baseline demographic and health characteristics were assessed by completion of a  
35 comprehensive medical history questionnaire. Height and weight were measured with a  
36 calibrated stadiometer and electronic scale, respectively. Diet was assessed before and following  
37 the intervention using a semi-quantitative food frequency questionnaire, whereas unsupervised  
38 physical activity was monitored throughout the study with a pedometer (Accusplit Eagle, Japan).

39  
40  
41 Cardiorespiratory fitness ( $VO_{2peak}$ ) was assessed from maximal exercise testing using a  
42 cycle ergometer (Excalibur Sport, Lode Medical Technology, Groningen, Netherlands), as  
43 previously described.[14] Testing was performed twice at baseline and twice at post-  
44 intervention, with values from each timepoint averaged. Heart rate variability (HRV) was  
45 measured from the final 5 min of a 25-min resting assessment, as previously described.[19] The

1  
2  
3 square root of the mean of the sum of the squares of differences between adjacent R-R intervals  
4  
5 (rMSSD), a marker of parasympathetic activity,[20] was retained for analysis.  
6  
7

### 8 **Statistical Power**

9  
10 Sample size was originally based on having adequate power to detect changes in the  
11 primary outcomes of the overall study,  $VO_{2peak}$  and blood pressure.[14] Additional participants  
12 were allocated to the 4 KKW condition to increase statistical power for detecting smaller  
13 anticipated fitness gains in this group. Because sleep was not a primary outcome in the design of  
14 the original study, there was no opportunity before data collection to investigate sample size or  
15 power for this outcome variable. Nevertheless, given the current enrollment, the study had 84%  
16 power (assuming two-tailed  $\alpha = 0.05$ ) to detect an effect size of 0.20 for MOS SPI score  
17 reduction.  
18  
19  
20  
21  
22  
23  
24  
25  
26  
27  
28

### 29 **Statistical Analysis**

30  
31 Baseline sleep quality was compared against normative data[17] using a one-sample *t*-  
32 test. Continuous MOS SPI values were examined across quartiles of BMI, parasympathetic tone  
33 (rMSSD), and cardiorespiratory fitness ( $VO_{2peak}$ ) with analysis of covariance (ANCOVA),  
34 controlling for age, BMI, sleep medication use, and HRT use. The likelihood of having  
35 significant sleep disturbance at baseline (i.e., MOS SPI > 25) was evaluated with logistic  
36 regression across the same quartiles using the same covariates.  
37  
38  
39  
40  
41  
42  
43  
44  
45

46 Two primary outcomes were evaluated for the current study: (1) change in continuous  
47 MOS SPI score across treatment groups; (2) odds of having significant sleep disturbance at post-  
48 intervention across treatment groups. Change in continuous MOS SPI scores across groups was  
49 tested by ANCOVA, with adjustment for age, BMI, sleep medication use, HRT use, and baseline  
50 MOS SPI values. All assumptions underlying the ANCOVA models were checked and verified  
51  
52  
53  
54  
55  
56  
57  
58  
59  
60

1  
2  
3 to be met. Individual treatment groups were compared to the control group with Tukey-Kramer  
4 adjustment for multiple comparisons. An  $\alpha$  level of .05 was used because it was our *a priori*  
5 intention to compare only the separate treatment groups with the control group. Dose-response  
6 trends were analysed using least-squares regression of MOS SPI change across groups. Logistic  
7 regression examined the odds of having significant sleep disturbance at post-intervention,  
8 following adjustment for age, BMI, sleep medication and HRT use, and baseline sleep  
9 disturbance ( $SPI > 25$ ,  $SPI \leq 25$ ). Unadjusted analyses provided similar results to those with  
10 covariate control, so only those results with full covariate adjustment were reported.  
11  
12

13  
14  
15 Finally, to examine whether improved sleep quality was significantly influenced by body  
16 weight, parasympathetic tone, or cardiorespiratory fitness, changes in weight, rMSSD, and  
17  $VO_{2peak}$  were added to the ANCOVA and logistic regression analyses. Additionally, among  
18 completed participants, changes in MOS SPI score were evaluated across quartiles of change in  
19 body weight, rMSSD, and  $VO_{2peak}$  following adjustment for age, treatment, BMI, sleep  
20 medication use, HRT use, and baseline MOS SPI score.  
21  
22

23  
24  
25 Analyses were limited to participants with baseline MOS Sleep data. Primary analyses  
26 were conducted using the intent-to-treat principle; if post-intervention data were missing,  
27 baseline values were carried forward for analysis. When analyses were restricted to only those  
28 participants with baseline and post-intervention MOS Sleep data ( $n = 359$ ), results were not  
29 substantively changed; similarly, when missing post-intervention data were imputed with mean  
30 values, results were unchanged. Therefore, only intent-to-treat analyses were presented. All  
31 analyses were performed using SAS version 9.2 (SAS Institute, Cary, NC). All tests were two-  
32 tailed, with statistical significance set at  $P \leq .05$ .  
33  
34  
35  
36  
37  
38  
39  
40  
41  
42  
43  
44  
45  
46  
47  
48  
49  
50  
51  
52  
53

## 54 55 56 57 58 59 60

### RESULTS

## Participant Characteristics

A summary of participant characteristics is provided in Table 1. Mean age and BMI of the 437 participants were  $57.3 \pm 6.5$  yr and  $31.8 \pm 3.9$  kg/m<sup>2</sup>, respectively.

Baseline MOS SPI values and prevalence of sleep disturbance are provided in Table 1. Of the 437 participants, 46% of the sample ( $n = 200$ ) were considered to have significant sleep disturbance at baseline, as defined as MOS SPI > 25. Baseline sleep quality of the participants was significantly worse than normative values[17] (normative value: 25.79;  $t_{436} = 2.42$ ,  $P = .02$ ), a magnitude of 0.12 SD.[21]

Baseline continuous MOS SPI values and odds of sleep disturbance across quartiles of BMI, rMSSD, and VO<sub>2peak</sub> are shown in Table 2. Sleep quality significantly differed among quartiles of rMSSD ( $F_{3,343} = 2.55$ ,  $P = .05$ ), with the lowest quartile of rMSSD having significantly worse baseline sleep quality than the other quartiles of rMSSD. Similarly, each quartile of rMSSD was associated with lower odds of having significant sleep disturbance at baseline compared to the lowest quartile of rMSSD. No differences in MOS SPI values or odds of having significant sleep disturbance were observed across quartiles of BMI or VO<sub>2peak</sub>.

## Exercise Training Adherence, Diet and Unsupervised Activity

Treatment adherence was calculated as the percentage of exercise energy expenditure achieved compared to the amount of exercise energy expenditure that was prescribed. Adherence was similar between exercise groups (4 KKW:  $95.1 \pm 16.1\%$ , 8 KKW:  $88.5 \pm 26.1\%$ , 12 KKW:  $92.5 \pm 20.9\%$ ), as previously reported.[14]

Changes in diet and unsupervised activity have been previously reported.[14,22] Pre- to post-intervention changes in energy intake did not differ between treatment conditions.

Pedometer-assessed unsupervised activity ranged from 4766 to 5067 steps/day at baseline and

1  
2  
3 did not differ between groups. Compared to baseline, daily steps increased for each group at  
4 month 1 (each  $P < .05$ ), with greater steps in the control group than the three exercise groups  
5 (each  $P < .05$ ). However, no differences in daily steps between the control and exercise groups  
6 were observed by months 5 and 6. Among the exercise groups, daily steps did not change from  
7 months 1 through 6. Therefore, the results reported here are unlikely to be due to changes in diet  
8 or spontaneous activity outside the exercise training laboratory.  
9

### 10 11 12 13 14 15 16 17 18 **Changes in Sleep Quality with Exercise Training**

19  
20 Changes in sleep quality with exercise training are depicted in Figure 2. A significant  
21 effect of the intervention was noted in the full model ( $F_{8,428} = 17.35, P < .001$ ), with treatment  
22 group being an independent predictor of change in continuous MOS SPI score ( $F_{3,428} = 2.79, P =$   
23  
24  
25  
26  
27  
28  
29  
30  
31  
32  
33  
34  
35  
36  
37  
38  
39  
40  
41  
42  
43  
44  
45  
46  
47  
48  
49  
50  
51  
52  
53  
54  
55  
56  
57  
58  
59  
60  
61  
62  
63  
64  
65  
66  
67  
68  
69  
70  
71  
72  
73  
74  
75  
76  
77  
78  
79  
80  
81  
82  
83  
84  
85  
86  
87  
88  
89  
90  
91  
92  
93  
94  
95  
96  
97  
98  
99  
100  
101  
102  
103  
104  
105  
106  
107  
108  
109  
110  
111  
112  
113  
114  
115  
116  
117  
118  
119  
120  
121  
122  
123  
124  
125  
126  
127  
128  
129  
130  
131  
132  
133  
134  
135  
136  
137  
138  
139  
140  
141  
142  
143  
144  
145  
146  
147  
148  
149  
150  
151  
152  
153  
154  
155  
156  
157  
158  
159  
160  
161  
162  
163  
164  
165  
166  
167  
168  
169  
170  
171  
172  
173  
174  
175  
176  
177  
178  
179  
180  
181  
182  
183  
184  
185  
186  
187  
188  
189  
190  
191  
192  
193  
194  
195  
196  
197  
198  
199  
200  
201  
202  
203  
204  
205  
206  
207  
208  
209  
210  
211  
212  
213  
214  
215  
216  
217  
218  
219  
220  
221  
222  
223  
224  
225  
226  
227  
228  
229  
230  
231  
232  
233  
234  
235  
236  
237  
238  
239  
240  
241  
242  
243  
244  
245  
246  
247  
248  
249  
250  
251  
252  
253  
254  
255  
256  
257  
258  
259  
260  
261  
262  
263  
264  
265  
266  
267  
268  
269  
270  
271  
272  
273  
274  
275  
276  
277  
278  
279  
280  
281  
282  
283  
284  
285  
286  
287  
288  
289  
290  
291  
292  
293  
294  
295  
296  
297  
298  
299  
300  
301  
302  
303  
304  
305  
306  
307  
308  
309  
310  
311  
312  
313  
314  
315  
316  
317  
318  
319  
320  
321  
322  
323  
324  
325  
326  
327  
328  
329  
330  
331  
332  
333  
334  
335  
336  
337  
338  
339  
340  
341  
342  
343  
344  
345  
346  
347  
348  
349  
350  
351  
352  
353  
354  
355  
356  
357  
358  
359  
360  
361  
362  
363  
364  
365  
366  
367  
368  
369  
370  
371  
372  
373  
374  
375  
376  
377  
378  
379  
380  
381  
382  
383  
384  
385  
386  
387  
388  
389  
390  
391  
392  
393  
394  
395  
396  
397  
398  
399  
400  
401  
402  
403  
404  
405  
406  
407  
408  
409  
410  
411  
412  
413  
414  
415  
416  
417  
418  
419  
420  
421  
422  
423  
424  
425  
426  
427  
428  
429  
430  
431  
432  
433  
434  
435  
436  
437  
438  
439  
440  
441  
442  
443  
444  
445  
446  
447  
448  
449  
450  
451  
452  
453  
454  
455  
456  
457  
458  
459  
460  
461  
462  
463  
464  
465  
466  
467  
468  
469  
470  
471  
472  
473  
474  
475  
476  
477  
478  
479  
480  
481  
482  
483  
484  
485  
486  
487  
488  
489  
490  
491  
492  
493  
494  
495  
496  
497  
498  
499  
500  
501  
502  
503  
504  
505  
506  
507  
508  
509  
510  
511  
512  
513  
514  
515  
516  
517  
518  
519  
520  
521  
522  
523  
524  
525  
526  
527  
528  
529  
530  
531  
532  
533  
534  
535  
536  
537  
538  
539  
540  
541  
542  
543  
544  
545  
546  
547  
548  
549  
550  
551  
552  
553  
554  
555  
556  
557  
558  
559  
560  
561  
562  
563  
564  
565  
566  
567  
568  
569  
570  
571  
572  
573  
574  
575  
576  
577  
578  
579  
580  
581  
582  
583  
584  
585  
586  
587  
588  
589  
590  
591  
592  
593  
594  
595  
596  
597  
598  
599  
600  
601  
602  
603  
604  
605  
606  
607  
608  
609  
610  
611  
612  
613  
614  
615  
616  
617  
618  
619  
620  
621  
622  
623  
624  
625  
626  
627  
628  
629  
630  
631  
632  
633  
634  
635  
636  
637  
638  
639  
640  
641  
642  
643  
644  
645  
646  
647  
648  
649  
650  
651  
652  
653  
654  
655  
656  
657  
658  
659  
660  
661  
662  
663  
664  
665  
666  
667  
668  
669  
670  
671  
672  
673  
674  
675  
676  
677  
678  
679  
680  
681  
682  
683  
684  
685  
686  
687  
688  
689  
690  
691  
692  
693  
694  
695  
696  
697  
698  
699  
700  
701  
702  
703  
704  
705  
706  
707  
708  
709  
710  
711  
712  
713  
714  
715  
716  
717  
718  
719  
720  
721  
722  
723  
724  
725  
726  
727  
728  
729  
730  
731  
732  
733  
734  
735  
736  
737  
738  
739  
740  
741  
742  
743  
744  
745  
746  
747  
748  
749  
750  
751  
752  
753  
754  
755  
756  
757  
758  
759  
760  
761  
762  
763  
764  
765  
766  
767  
768  
769  
770  
771  
772  
773  
774  
775  
776  
777  
778  
779  
780  
781  
782  
783  
784  
785  
786  
787  
788  
789  
790  
791  
792  
793  
794  
795  
796  
797  
798  
799  
800  
801  
802  
803  
804  
805  
806  
807  
808  
809  
810  
811  
812  
813  
814  
815  
816  
817  
818  
819  
820  
821  
822  
823  
824  
825  
826  
827  
828  
829  
830  
831  
832  
833  
834  
835  
836  
837  
838  
839  
840  
841  
842  
843  
844  
845  
846  
847  
848  
849  
850  
851  
852  
853  
854  
855  
856  
857  
858  
859  
860  
861  
862  
863  
864  
865  
866  
867  
868  
869  
870  
871  
872  
873  
874  
875  
876  
877  
878  
879  
880  
881  
882  
883  
884  
885  
886  
887  
888  
889  
890  
891  
892  
893  
894  
895  
896  
897  
898  
899  
900  
901  
902  
903  
904  
905  
906  
907  
908  
909  
910  
911  
912  
913  
914  
915  
916  
917  
918  
919  
920  
921  
922  
923  
924  
925  
926  
927  
928  
929  
930  
931  
932  
933  
934  
935  
936  
937  
938  
939  
940  
941  
942  
943  
944  
945  
946  
947  
948  
949  
950  
951  
952  
953  
954  
955  
956  
957  
958  
959  
960  
961  
962  
963  
964  
965  
966  
967  
968  
969  
970  
971  
972  
973  
974  
975  
976  
977  
978  
979  
980  
981  
982  
983  
984  
985  
986  
987  
988  
989  
990  
991  
992  
993  
994  
995  
996  
997  
998  
999  
1000  
1001  
1002  
1003  
1004  
1005  
1006  
1007  
1008  
1009  
1010  
1011  
1012  
1013  
1014  
1015  
1016  
1017  
1018  
1019  
1020  
1021  
1022  
1023  
1024  
1025  
1026  
1027  
1028  
1029  
1030  
1031  
1032  
1033  
1034  
1035  
1036  
1037  
1038  
1039  
1040  
1041  
1042  
1043  
1044  
1045  
1046  
1047  
1048  
1049  
1050  
1051  
1052  
1053  
1054  
1055  
1056  
1057  
1058  
1059  
1060  
1061  
1062  
1063  
1064  
1065  
1066  
1067  
1068  
1069  
1070  
1071  
1072  
1073  
1074  
1075  
1076  
1077  
1078  
1079  
1080  
1081  
1082  
1083  
1084  
1085  
1086  
1087  
1088  
1089  
1090  
1091  
1092  
1093  
1094  
1095  
1096  
1097  
1098  
1099  
1100  
1101  
1102  
1103  
1104  
1105  
1106  
1107  
1108  
1109  
1110  
1111  
1112  
1113  
1114  
1115  
1116  
1117  
1118  
1119  
1120  
1121  
1122  
1123  
1124  
1125  
1126  
1127  
1128  
1129  
1130  
1131  
1132  
1133  
1134  
1135  
1136  
1137  
1138  
1139  
1140  
1141  
1142  
1143  
1144  
1145  
1146  
1147  
1148  
1149  
1150  
1151  
1152  
1153  
1154  
1155  
1156  
1157  
1158  
1159  
1160  
1161  
1162  
1163  
1164  
1165  
1166  
1167  
1168  
1169  
1170  
1171  
1172  
1173  
1174  
1175  
1176  
1177  
1178  
1179  
1180  
1181  
1182  
1183  
1184  
1185  
1186  
1187  
1188  
1189  
1190  
1191  
1192  
1193  
1194  
1195  
1196  
1197  
1198  
1199  
1200  
1201  
1202  
1203  
1204  
1205  
1206  
1207  
1208  
1209  
1210  
1211  
1212  
1213  
1214  
1215  
1216  
1217  
1218  
1219  
1220  
1221  
1222  
1223  
1224  
1225  
1226  
1227  
1228  
1229  
1230  
1231  
1232  
1233  
1234  
1235  
1236  
1237  
1238  
1239  
1240  
1241  
1242  
1243  
1244  
1245  
1246  
1247  
1248  
1249  
1250  
1251  
1252  
1253  
1254  
1255  
1256  
1257  
1258  
1259  
1260  
1261  
1262  
1263  
1264  
1265  
1266  
1267  
1268  
1269  
1270  
1271  
1272  
1273  
1274  
1275  
1276  
1277  
1278  
1279  
1280  
1281  
1282  
1283  
1284  
1285  
1286  
1287  
1288  
1289  
1290  
1291  
1292  
1293  
1294  
1295  
1296  
1297  
1298  
1299  
1300  
1301  
1302  
1303  
1304  
1305  
1306  
1307  
1308  
1309  
1310  
1311  
1312  
1313  
1314  
1315  
1316  
1317  
1318  
1319  
1320  
1321  
1322  
1323  
1324  
1325  
1326  
1327  
1328  
1329  
1330  
1331  
1332  
1333  
1334  
1335  
1336  
1337  
1338  
1339  
1340  
1341  
1342  
1343  
1344  
1345  
1346  
1347  
1348  
1349  
1350  
1351  
1352  
1353  
1354  
1355  
1356  
1357  
1358  
1359  
1360  
1361  
1362  
1363  
1364  
1365  
1366  
1367  
1368  
1369  
1370  
1371  
1372  
1373  
1374  
1375  
1376  
1377  
1378  
1379  
1380  
1381  
1382  
1383  
1384  
1385  
1386  
1387  
1388  
1389  
1390  
1391  
1392  
1393  
1394  
1395  
1396  
1397  
1398  
1399  
1400  
1401  
1402  
1403  
1404  
1405  
1406  
1407  
1408  
1409  
1410  
1411  
1412  
1413  
1414  
1415  
1416  
1417  
1418  
1419  
1420  
1421  
1422  
1423  
1424  
1425  
1426  
1427  
1428  
1429  
1430  
1431  
1432  
1433  
1434  
1435  
1436  
1437  
1438  
1439  
1440  
1441  
1442  
1443  
1444  
1445  
1446  
1447  
1448  
1449  
1450  
1451  
1452  
1453  
1454  
1455  
1456  
1457  
1458  
1459  
1460  
1461  
1462  
1463  
1464  
1465  
1466  
1467  
1468  
1469  
1470  
1471  
1472  
1473  
1474  
1475  
1476  
1477  
1478  
1479  
1480  
1481  
1482  
1483  
1484  
1485  
1486  
1487  
1488  
1489  
1490  
1491  
1492  
1493  
1494  
1495  
1496  
1497  
1498  
1499  
1500  
1501  
1502  
1503  
1504  
1505  
1506  
1507  
1508  
1509  
1510  
1511  
1512  
1513  
1514  
1515  
1516  
1517  
1518  
1519  
1520  
1521  
1522  
1523  
1524  
1525  
1526  
1527  
1528  
1529  
1530  
1531  
1532  
1533  
1534  
1535  
1536  
1537  
1538  
1539  
1540  
1541  
1542  
1543  
1544  
1545  
1546  
1547  
1548  
1549  
1550  
1551  
1552  
1553  
1554  
1555  
1556  
1557  
1558  
1559  
1560  
1561  
1562  
1563  
1564  
1565  
1566  
1567  
1568  
1569  
1570  
1571  
1572  
1573  
1574  
1575  
1576  
1577  
1578  
1579  
1580  
1581  
1582  
1583  
1584  
1585  
1586  
1587  
1588  
1589  
1590  
1591  
1592  
1593  
1594  
1595  
1596  
1597  
1598  
1599  
1600  
1601  
1602  
1603  
1604  
1605  
1606  
1607  
1608  
1609  
1610  
1611  
1612  
1613  
1614  
1615  
1616  
1617  
1618  
1619  
1620  
1621  
1622  
1623  
1624  
1625  
1626  
1627  
1628  
1629  
1630  
1631  
1632  
1633  
1634  
1635  
1636  
1637  
1638  
1639  
1640  
1641  
1642  
1643  
1644  
1645  
1646  
1647  
1648  
1649  
1650  
1651  
1652  
1653  
1654  
1655  
1656  
1657  
1658  
1659  
1660  
1661  
1662  
1663  
1664  
1665  
1666  
1667  
1668  
1669  
1670  
1671  
1672  
1673  
1674  
1675  
1676  
1677  
1678  
1679  
1680  
1681  
1682  
1683  
1684  
1685  
1686  
1687  
1688  
1689  
1690  
1691  
1692  
1693  
1694  
1695  
1696  
1697  
1698  
1699  
1700  
1701  
1702  
1703  
1704  
1705  
1706  
1707  
1708  
1709  
1710  
1711  
1712  
1713  
1714  
1715  
1716  
1717  
1718  
1719  
1720  
1721  
1722  
1723  
1724  
1725  
1726  
1727  
1728  
1729  
1730  
1731  
1732  
1733  
1734  
1735  
1736  
1737  
1738  
1739  
1740  
1741  
1742  
1743  
1744  
1745  
1746  
1747  
1748  
1749  
1750  
1751  
1752  
1753  
1754  
1755  
1756  
1757  
1758  
1759  
1760  
1761  
1762  
1763  
1764  
1765  
1766  
1767  
1768  
1769  
1770  
1771  
1772  
1773  
1774  
1775  
1776  
1777  
1778  
1779  
1780  
1781  
1782  
1783  
1784  
1785  
1786  
1787  
1788  
1789  
1790  
1791  
1792  
1793  
1794  
1795  
1796  
1797  
1798  
1799  
1800  
1801  
1802  
1803  
1804  
1805  
1806  
1807  
1808  
1809  
1810  
1811  
1812  
1813  
1814  
1815  
1816  
1817  
1818  
1819  
1820  
1821  
1822  
1823  
1824  
1825  
1826  
1827  
1828  
1829  
1830  
1831  
1832  
1833  
1834  
1835  
1836  
1837  
1838  
1839  
1840  
1841  
1842  
1843  
1844  
1845  
1846  
1847  
1848  
1849  
1850  
1851  
1852  
1853  
1854  
1855  
1856  
1857  
1858  
1859  
1860  
1861  
1862  
1863  
1864  
1865  
1866  
1867  
1868  
1869  
1870  
1871  
1872  
1873  
1874  
1875  
1876  
1877  
1878  
1879  
1880  
1881  
1882  
1883  
1884  
1885  
1886  
1887  
1888  
1889  
1890  
1891  
1892  
1893  
1894  
1895  
1896  
1897  
1898  
1899  
1900  
1901  
1902  
1903  
1904  
1905  
1906  
1907  
1908  
1909  
1910  
1911  
1912  
1913  
1914  
1915  
1916  
1917  
1918  
1919  
1920  
1921  
1922  
1923  
1924  
1925  
1926  
1927  
1928  
1929  
1930  
1931  
1932  
1933  
1934  
1935  
1936  
1937  
1938  
1939  
1940  
1941  
1942  
1943  
1944  
1945  
1946  
1947  
1948  
1949  
1950  
1951  
1952  
1953  
1954  
1955  
1956  
1957  
1958  
1959  
1960  
1961  
1962  
1963  
1964  
1965  
1966  
1967  
1968  
1969  
1970  
1971  
1972  
1973  
1974  
1975  
1976  
1977  
1978  
1979  
1980  
1981  
1982  
1983  
1984  
1985  
1986  
1987  
1988  
1989  
1990  
1991  
1992  
1993  
1994  
1995  
1996  
1997  
1998  
1999  
2000  
2001  
2002  
2003  
2004  
2005  
2006  
2007  
2008  
2009  
2010  
2011  
2012  
2013  
2014  
2015  
2016  
2017  
2018  
2019  
2020  
2021  
2022  
2023  
2024  
2025  
2026  
2027  
2028  
2029  
2030  
2031  
2032  
2033  
2034  
2035  
2036  
2037  
2038  
2039  
2040  
2041  
2042  
2043  
2044  
2045  
2046  
2047  
2048  
2049  
2050  
2051  
2052  
2053  
2054  
2055  
2056  
2057  
2058  
2059  
2060  
2061  
2062  
2063  
2064  
2065  
2066  
2067  
2068  
2069  
2070  
2071  
2072  
2073  
2074  
2075  
2076  
2077  
2078  
2079  
2080  
2081  
2082  
2083  
2084  
2085  
2086  
2087  
2088  
2089  
2090  
2091  
2092  
2093  
2094  
2095  
2096  
2097  
2098  
2099  
2100  
2101  
2102  
2103  
2104  
2105  
2106  
2107  
2108  
2109  
2110  
2111  
2112  
2113  
2114  
2115  
2116  
2117  
2118  
2119  
2120  
2121  
2122  
2123  
2124  
2125  
2126  
2127  
2128  
2129  
2130  
2131  
2132  
2133  
2134  
2135  
2136  
2137  
2138  
2139  
2140  
2141  
2142  
2143  
2144  
2145  
2146  
2147  
2148  
2149  
2150  
2151  
2152  
2153  
2154  
2155  
2156  
2157  
2158  
2159  
2160  
2161  
2162  
2163  
2164  
2165  
2166  
2167  
2168  
2169  
2170  
2171  
2172  
2173  
2174  
2175  
2176  
2177  
2178  
2179  
2180  
2181  
2182  
2183  
2

1  
2  
3 1.08 [3.70], 4 KKW: -1.23 [3.43], 8 KKW: -1.60 [3.23], 12 KKW: -1.25 [2.83] kg;  $F_{3,433} = 0.43$ ,  
4  
5  $P = .73$ ). Cardiorespiratory fitness improved with exercise training in a dose-dependent manner

6  
7 (control: -0.20 [1.88], 4 KKW: 0.59 [1.83], 8 KKW: 1.13 [1.54], 12 KKW: 1.42 [1.79]

8  
9 mL/kg/min;  $F_{3,433} = 15.32$ ,  $P < .001$ ). Among those with usable HRV and sleep data ( $n = 351$ ),

10  
11 rMSSD improved in a dose-dependent fashion with exercise training (control: 0.20 [8.45], 4

12  
13 KKW: 2.72 [9.20], 8 KKW: 3.72 [11.47], 12 KKW: 5.29 [9.51] ms;  $F_{3,347} = 3.82$ ,  $P = .01$ ).

14  
15 When added to the model analysing differences in continuous MOS SPI change among treatment

16  
17 groups, none of these covariates were significant ( $P \leq .14$ ), and inclusion of these variables did

18  
19 not alter the previously noted treatment group differences or linear dose-response effects. When

20  
21 individually added to logistic regression analyses, none of these covariates significantly affected

22  
23 the odds of having significant sleep disturbance at post-intervention (Table 3). In addition, when

24  
25 change in MOS SPI was evaluated across quartiles of change in body weight, rMSSD, or

26  
27  $VO_{2peak}$ , no significant-between group differences were noted (data not shown). Finally, change

28  
29 in MOS SPI did not correlate with change in body weight, rMSSD or  $VO_{2peak}$  ( $r < .03$ ,  $P > .58$ ).

## 30 31 32 33 34 35 36 37 38 39 40 41 42 43 44 45 46 47 48 49 50 51 52 53 54 55 56 57 58 59 60

### DISCUSSION

The key finding from exploratory analyses of the DREW randomised controlled trial was

that exercise training significantly improved subjective sleep quality in overweight/obese

postmenopausal women. Specifically, we observed a dose-response trend for the continuous

MOS SPI values and, perhaps most notably, significantly reduced odds of having sleep

disturbance at post-intervention with even 50% of the recommended dose of exercise for adults.

Interestingly, the improvements in sleep quality were not related to changes in body weight,

parasympathetic tone, or cardiorespiratory fitness.

### Previous research

1  
2  
3 Previous research with postmenopausal women had yielded conflicting findings  
4 regarding whether exercise improved sleep.[9-12] While suggested by prior studies in this  
5 population,[9,11] the present study is the first to document a dose-response relationship between  
6 exercise and improved subjective sleep quality. Although sleep was an exploratory outcome of  
7 the DREW study, it is the largest clinical trial to date that has examined the relationship between  
8 aerobic exercise dose and sleep quality. Our current findings mirror the overall body of research  
9 indicating that exercise improves sleep, most prominently in those with existing sleep  
10 disturbances.[8]  
11  
12  
13  
14  
15  
16  
17  
18  
19  
20  
21

### 22 **Clinical implications**

23  
24 When considering the improvements in continuous MOS SPI scores following exercise  
25 training, the clinical significance is uncertain. The observation that only those who exercised at a  
26 12-KKW dose experienced a significant improvement in sleep quality compared to control may  
27 be viewed as discouraging, as this dose equated to approximately 190 min/wk of moderate-  
28 intensity aerobic exercise[14] and many individuals may not be willing to perform that much  
29 exercise to improve sleep. However, the significant dose-response effect suggests that any dose  
30 of exercise should benefit sleep, albeit with larger effects noted with higher levels of energy  
31 expenditure.  
32  
33  
34  
35  
36  
37  
38  
39  
40  
41  
42

43 In contrast, the greatly reduced odds of having significant sleep disturbance following  
44 exercise training suggests that exercise may hold the most promise as a treatment option for  
45 postmenopausal women with significant sleep disturbance. In particular, even an exercise dose  
46 consisting of 50% of the NIH Consensus Panel physical activity recommendations significantly  
47 reduced the odds of having a post-intervention MOS SPI > 25. This is noteworthy, since sleep  
48 complaints are prevalent in postmenopausal women[1] and current treatment options, such as  
49  
50  
51  
52  
53  
54  
55  
56  
57  
58  
59  
60



1  
2  
3 HRT and hypnotic medication, have often been found to be only mildly efficacious at improving  
4 sleep quality compared to placebo in postmenopausal women.[6,23]  
5  
6

7  
8 The mechanisms by which exercise may improve subjective sleep quality in  
9  
10 postmenopausal women are unknown. Although the present study was not specifically designed  
11 to address mechanisms of effect, secondary analyses focused on changes in three variables which  
12 have been shown to be related to sleep: body weight, parasympathetic activity, and  
13 cardiorespiratory fitness. There is a clear association between obesity and disturbed sleep,[24]  
14 and weight loss has been found to reduce sleep complaints.[25] Likewise, poor sleepers have  
15 been found to have impaired sleep HRV,[26] and exercise training has been well-documented to  
16 improve autonomic function.[27] Finally, physical fitness has been previously associated with  
17 sleep quality,[28] and greater improvements in fitness have been associated with better sleep  
18 outcomes in some experimental studies.[9,12]  
19  
20  
21  
22  
23  
24  
25  
26  
27  
28  
29  
30

31  
32 Nonetheless, in the present study, changes in body weight, parasympathetic tone, or  
33 cardiorespiratory fitness were not significantly related to changes in sleep, whether assessed by  
34 covariate control, change in sleep quality across quartiles of change in these variables, or  
35 correlations between change in these variables and change in sleep quality. Although significant  
36 improvements were noted for rMSSD and  $VO_{2peak}$  following exercise training in this  
37 sample,[14,19] the variability associated with the sleep measure used in the current study may  
38 have masked any possible associations. The present study suggests that exercise training can  
39 result in improved sleep quality independent of weight loss, increased fitness, or improved  
40 autonomic balance.  
41  
42  
43  
44  
45  
46  
47  
48  
49  
50  
51

## 52 **Strengths and weaknesses**

53  
54  
55  
56  
57  
58  
59  
60

1  
2  
3  
4 Strengths of the study include a randomised controlled design, closely supervised  
5  
6 intervention, use of a validated measure of sleep quality, and the largest experimental sample  
7  
8 size to investigate the effects of exercise on sleep. The study population was another strength, as  
9  
10 the prevalence of disturbed sleep was high. Finally, assessment of variables that are related to  
11  
12 sleep quality and may contribute to improved sleep following exercise training was another  
13  
14 strength of the study.  
15

16  
17 A limitation of the study is that sleep quality was not a primary outcome of the original  
18  
19 DREW trial. Therefore, results should be interpreted cautiously. Another study limitation is that  
20  
21 sleep was not objectively assessed (i.e., via wrist actigraphy or polysomnography). Because of  
22  
23 the subjective nature of the outcome and impossibility of blinding participants to their treatment,  
24  
25 improvements in self-reported sleep quality may have been subject to expectancy effects, as  
26  
27 exercise is commonly believed to improve sleep quality.[7] However, the finding of a significant  
28  
29 linear trend between exercise dose and improvement in sleep quality would not necessarily be  
30  
31 expected. Moreover, that sleep was not a primary outcome of interest and part of a wide range of  
32  
33 study assessments further reduces the chance of expectancy or demand biases. Additionally,  
34  
35 there is growing recognition of the merit of assessing subjective sleep quality.[29] For instance,  
36  
37 in contrast with subjective sleep quality, objective sleep has not been found to be altered across  
38  
39 the menopausal transition.[30] Furthermore, impaired subjective sleep quality is what prompts  
40  
41 search for treatment, and recent evidence suggests that traditional objective sleep measures might  
42  
43 be inadequate for detecting subtle indicators of disturbed sleep.[31] It is also noteworthy that  
44  
45 subjective sleep quality has been associated with quality of life and physical and mental health in  
46  
47 postmenopausal women.[32]  
48  
49  
50  
51  
52  
53  
54  
55  
56  
57  
58  
59  
60

1  
2  
3 A lack of assessment of obstructive sleep apnoea (OSA) was another limitation. Although  
4  
5 OSA is considered to be a male-dominated sleep disorder, postmenopausal OSA prevalence is  
6  
7 similar between males and females.[33] Moreover, excess weight is the primary cause of OSA  
8  
9 for most adults,[34] which would place this overweight/obese sample at even higher risk for  
10  
11 OSA. Evidence suggests that exercise, in the absence of more established treatments or  
12  
13 significant weight loss, is moderately efficacious at reducing OSA severity and improving  
14  
15 sleep.[35] However, dose-response effects of exercise on OSA severity are unknown.  
16  
17  
18

19  
20 Finally, because aerobic activity was the only mode of exercise studied in the DREW  
21  
22 trial, the possible effects of resistance exercise on sleep quality could not be examined in this  
23  
24 sample. Resistance training has been shown to improve sleep quality,[36] though there has been  
25  
26 minimal work comparing different doses of resistance exercise on sleep quality.[37]  
27  
28

## 29 **Conclusions**

30  
31 In summary, in a sample of overweight/obese postmenopausal women, exercise training  
32  
33 significantly reduced the odds of having significant sleep disturbance. These improvements in  
34  
35 sleep were independent of the effects of exercise training on body weight, parasympathetic tone,  
36  
37 or cardiorespiratory fitness. Additional research with more comprehensive measurement of sleep  
38  
39 is warranted, but exercise training appears to significantly improve sleep quality in  
40  
41 postmenopausal women.  
42  
43  
44  
45  
46  
47  
48  
49  
50  
51  
52  
53  
54  
55  
56  
57  
58  
59  
60

## ACKNOWLEDGMENTS

We thank the DREW participants and the Cooper Institute staff for their efforts on this study.

**Contributors:** TSC and SNB designed and organised the study. TSC, CPE, and SNB collected the data. CEK and XS performed the statistical analyses. CEK wrote the first draft of the manuscript. XS, MHH, SDY, CPE, SNB, and TSC provided critical input at all stages and critically reviewed and contributed to the final draft. CEK and TSC are guarantors.

**Funding:** This work was supported by grants HL66262 and T32 HL082610-05 from the National Institutes of Health, and American Heart Association Texas Affiliate award 02651404. Life Fitness (Schiller Park, Illinois) provided exercise equipment for this study.

**Competing interest statement:** All authors have completed the Unified Competing Interest form at [www.icmje.org/coi\\_disclosure.pdf](http://www.icmje.org/coi_disclosure.pdf) (available on request from the corresponding author) and declare: no support from any organisation for the submitted work (aside from the funding sources listed); no financial relationships with any organisations that might have an interest in the submitted work in the previous three years; and no other relationships or activities that could appear to have influenced the submitted work.

**Ethical approval:** Institutional Review Boards of the Cooper Institute (Dallas, TX) and the Pennington Biomedical Research Center (Baton Rouge, LA).

**Role of the study sponsors:** The sponsors had no role in the study design, protocol development, or in conducting the trial, data collection, data analysis, or preparation of the manuscript.

**Data sharing:** The data set will be available from the corresponding author as part of an academic collaboration.

**Trial registration:** Clinicaltrials.gov identification number NCT00011193.

## REFERENCES

1. Kravitz HM, Ganz PA, Bromberger J, et al. Sleep difficulty in women at midlife: a community survey of sleep and the menopausal transition. *Menopause* 2003;10:19-28.
2. National Institutes of Health. National Institutes of Health State-of-the-Science Conference statement: management of menopause-related symptoms. *Ann Intern Med* 2005;142:1003-13.
3. Buscemi N, Vandermeer B, Friesen C, et al. The efficacy and safety of drug treatments for chronic insomnia in adults: a meta-analysis of RCTs. *J Gen Intern Med* 2007;22:1335-50.
4. Nowakowski S, Meliska CJ, Martinez LF, et al. Sleep and menopause. *Curr Neurol Neurosci Rep* 2009;9:165-72.
5. Sarti CD, Chiantera A, Graziottin A, et al. Hormone therapy and sleep quality in women around menopause. *Menopause* 2005;12:545-51.
6. Kalleinen N, Polo O, Himanen SL, et al. The effect of estrogen plus progestin treatment on sleep: a randomized, placebo-controlled, double-blind trial in premenopausal and late postmenopausal women. *Climacteric* 2008;11:233-43.
7. Youngstedt SD, Kline CE. Epidemiology of exercise and sleep. *Sleep Biol Rhythms* 2006;4:215-21.
8. Youngstedt SD. Effects of exercise on sleep. *Clin Sports Med* 2005;24:355-65.
9. Tworoger SS, Yasui Y, Vitiello MV, et al. Effects of a yearlong moderate-intensity exercise and a stretching intervention on sleep quality in postmenopausal women. *Sleep* 2003;26:830-6.
10. Elavsky S, McAuley E. Lack of perceived sleep improvement after 4-month structured exercise programs. *Menopause* 2007;14:535-40.

- 1  
2  
3 11. Wilbur J, Miller AM, McDevitt J, et al. Menopausal status, moderate-intensity walking, and  
4 symptoms in midlife women. *Res Theory Nurs Pract* 2005;19:163-80.  
5  
6
- 7  
8 12. King AC, Oman RF, Brassington GS, et al. Moderate-intensity exercise and self-rated  
9 quality of sleep in older adults. A randomized controlled trial. *JAMA* 1997;277:32-7.  
10  
11
- 12 13. Morss GM, Jordan AN, Skinner JS, et al. Dose Response to Exercise in Women aged 45-75  
13 yr (DREW): design and rationale. *Med Sci Sports Exerc* 2004;36:336-44.  
14  
15
- 16 14. Church TS, Earnest CP, Skinner JS, et al. Effects of different doses of physical activity on  
17 cardiorespiratory fitness among sedentary, overweight or obese postmenopausal women  
18 with elevated blood pressure: a randomized controlled trial. *JAMA* 2007;297:2081-91.  
19  
20
- 21 15. NIH Consensus Development Panel on Physical Activity and Cardiovascular Health.  
22 Physical activity and cardiovascular health. *JAMA* 1996;276:241-6.  
23  
24
- 25 16. Hays RD, Stewart AL. Sleep measures. In: Stewart AL, Ware JE, Jr., eds. *Measuring*  
26 *Functioning and Well-being: The Medical Outcomes Study Approach*. Durham, NC: Duke  
27 University Press 1992:235-59.  
28  
29
- 30 17. Hays RD, Martin SA, Sesti AM, et al. Psychometric properties of the Medical Outcomes  
31 Study Sleep measure. *Sleep Med* 2005;6:41-4.  
32  
33
- 34 18. Allen RP, Kosinski M, Hill-Zabala CE, et al. Psychometric evaluation and tests of validity  
35 of the Medical Outcomes Study 12-item Sleep Scale (MOS sleep). *Sleep Med* 2009;10:531-  
36  
37  
38  
39  
40  
41  
42  
43  
44  
45  
46  
47  
48  
49  
50  
51  
52  
53  
54  
55  
56  
57  
58  
59  
60
19. Earnest CP, Lavie CJ, Blair SN, et al. Heart rate variability characteristics in sedentary  
postmenopausal women following six months of exercise training: the DREW study. *PLoS*  
*One* 2008;3:e2288.

- 1  
2  
3 20. Task Force of the European Society of Cardiology and the North American Society of  
4 Pacing and Electrophysiology. Heart rate variability: standards of measurement,  
5 physiological interpretation, and clinical use. *Eur Heart J* 1996;17:354-81.  
6  
7
- 8  
9 21. Cohen J. *Statistical Power Analysis for the Behavioral Sciences*. 2<sup>nd</sup> ed. Philadelphia, PA:  
10 Lawrence Erlbaum Associates, Inc. 1988.  
11  
12
- 13 22. Church TS, Martin CK, Thompson AM, et al. Changes in weight, waist circumference and  
14 compensatory responses with different doses of exercise among sedentary, overweight  
15 postmenopausal women. *PLoS One* 2009;4:e4515.  
16  
17
- 18 23. Soares CN, Joffe H, Rubens R, et al. Eszopiclone in patients with insomnia during  
19 perimenopause and early postmenopause: a randomized controlled trial. *Obstet Gynecol*  
20 2006;108:1402-10.  
21  
22
- 23 24. Fogelholm M, Kronholm E, Kukkonen-Harjula K, et al. Sleep-related disturbances and  
24 physical inactivity are independently associated with obesity in adults. *Int J Obes (Lond)*  
25 2007;31:1713-21.  
26  
27
- 28 25. Dixon JB, Schachter LM, O'Brien PE. Sleep disturbance and obesity: changes following  
29 surgically induced weight loss. *Arch Intern Med* 2001;161:102-6.  
30  
31
- 32 26. Bonnet MH, Arand DL. Heart rate variability in insomniacs and matched normal sleepers.  
33 *Psychosom Med*. 1998;60:610-5.  
34  
35
- 36 27. Routledge FS, Campbell TS, Fetridge-Durdle JA, et al. Improvements in heart rate  
37 variability with exercise therapy. *Can J Cardiol* 2010;26:303-12.  
38  
39
- 40 28. Lee AJ, Lin WH. Association between sleep quality and physical fitness in female young  
41 adults. *J Sports Med Phys Fitness* 2007;47:462-7.  
42  
43  
44  
45  
46  
47  
48  
49  
50  
51  
52  
53  
54  
55  
56  
57  
58  
59  
60

- 1
  - 2
  - 3
  - 4
  - 5
  - 6
  - 7
  - 8
  - 9
  - 10
  - 11
  - 12
  - 13
  - 14
  - 15
  - 16
  - 17
  - 18
  - 19
  - 20
  - 21
  - 22
  - 23
  - 24
  - 25
  - 26
  - 27
  - 28
  - 29
  - 30
  - 31
  - 32
  - 33
  - 34
  - 35
  - 36
  - 37
  - 38
  - 39
  - 40
  - 41
  - 42
  - 43
  - 44
  - 45
  - 46
  - 47
  - 48
  - 49
  - 50
  - 51
  - 52
  - 53
  - 54
  - 55
  - 56
  - 57
  - 58
  - 59
  - 60
29. Buysse DJ, Reynolds CF III, Monk TH, et al. The Pittsburgh Sleep Quality Index: a new instrument for psychiatric practice and research. *Psychiatry Res* 1989;28:193-213.
30. Young T, Rabago D, Zgierska A, et al. Objective and subjective sleep quality in premenopausal, perimenopausal, and postmenopausal women in the Wisconsin Sleep Cohort Study. *Sleep* 2003;26:667-72.
31. Perlis ML, Smith MT, Andrews PJ, et al. Beta/Gamma EEG activity in patients with primary and secondary insomnia and good sleeper controls. *Sleep* 2001;24:110-7.
32. Baker FC, Wolfson AR, Lee KA. Association of sociodemographic, lifestyle, and health factors with sleep quality and daytime sleepiness in women: findings from the 2007 National Sleep Foundation "Sleep in America Poll". *J Womens Health* 2009;18:841-9.
33. Young T, Finn L, Austin D, et al. Menopausal status and sleep-disordered breathing in the Wisconsin Sleep Cohort Study. *Am J Respir Crit Care Med* 2003;167:1181-5.
34. Young T, Peppard PE, Taheri S. Excess weight and sleep-disordered breathing. *J Appl Physiol* 2005;99:1592-9.
35. Kline CE, Crowley EP, Ewing GB, et al. The effect of exercise training on obstructive sleep apnea and sleep quality: a randomized controlled trial. *Sleep* 2011;34:1631-40.
36. Singh NA, Clements KM, Fiatarone MA. A randomized controlled trial of the effect of exercise on sleep. *Sleep* 1997;20:95-101.
37. Singh NA, Stavrinou TM, Scarbek Y, et al. A randomized controlled trial of high versus low intensity weight training versus general practitioner care for clinical depression in older adults. *J Gerontol A Biol Sci Med Sci* 2005;60:768-76.



**FIGURE LEGENDS**

**Figure 1.** *Participant screening and study flow.* Of 4545 screened for participation, 464 postmenopausal women were randomised to one of four treatments. Baseline MOS Sleep data were available for 437 participants; those who discontinued the study or without follow-up MOS Sleep data had baseline data carried forward for analysis. BMI: body mass index; KKW: kilocalories of energy expenditure per kilogram of body weight per week; MOS: Medical Outcomes Study.

**Figure 2.** *Change in MOS Sleep Problems Index scores among treatment groups.* Data presented as least-squares means  $\pm$  95% confidence intervals. Analyses adjusted for age, BMI, sleep medication use, hormone replacement therapy use, and baseline MOS SPI score. \* Indicates difference from control ( $P = .02$ ). KKW: kilocalories of energy expenditure per kilogram of body weight per week; MOS: Medical Outcomes Study.

## TABLES

**Table 1. Baseline Participant Characteristics.**

|                                          | All<br>(N=437) | Control<br>(n=92) | Exercise Groups  |                 |                  |
|------------------------------------------|----------------|-------------------|------------------|-----------------|------------------|
|                                          |                |                   | 4 KKW<br>(n=151) | 8 KKW<br>(n=99) | 12 KKW<br>(n=95) |
| Age, y                                   | 57.32 (6.46)   | 57.14 (5.91)      | 57.78 (6.53)     | 57.58 (6.63)    | 56.47 (6.72)     |
| Education, y                             | 14.03 (2.11)   | 14.01 (2.12)      | 13.80 (2.02)     | 14.37 (2.06)    | 14.00 (2.28)     |
| Married, No. (%)                         | 398 (91)       | 86 (93)           | 141 (94)         | 87 (88)         | 84 (88)          |
| Ethnicity/race, No. (%)                  |                |                   |                  |                 |                  |
| White                                    | 278 (64)       | 58 (63)           | 92 (61)          | 60 (61)         | 68 (72)          |
| African-American                         | 128 (29)       | 23 (25)           | 49 (32)          | 32 (32)         | 24 (25)          |
| Hispanic/Other                           | 31 (7)         | 11 (12)           | 10 (7)           | 7 (7)           | 3 (3)            |
| Employed, No. (%)                        | 304 (70)       | 62 (67)           | 105 (70)         | 67 (68)         | 70 (74)          |
| Cigarette Smoking, No. (%)               | 25 (6)         | 5 (5)             | 8 (5)            | 4 (4)           | 8 (8)            |
| Medication Use, No. (%)                  |                |                   |                  |                 |                  |
| Antihypertensive                         | 126 (29)       | 22 (24)           | 41 (27)          | 32 (32)         | 31 (33)          |
| Hyperlipidemia                           | 73 (17)        | 14 (15)           | 31 (21)          | 17 (17)         | 11 (12)          |
| Thyroid                                  | 65 (15)        | 12 (13)           | 19 (13)          | 16 (16)         | 18 (19)          |
| Antidepressant                           | 78 (18)        | 16 (17)           | 28 (19)          | 18 (18)         | 16 (17)          |
| HRT                                      | 202 (46)       | 48 (52)           | 67 (44)          | 43 (43)         | 44 (46)          |
| Antianxiety                              | 20 (5)         | 7 (8)             | 7 (5)            | 4 (4)           | 2 (2)            |
| Sedatives/sleep aids                     | 12 (3)         | 4 (4)             | 5 (3)            | 3 (3)           | 0 (0)            |
| Energy Intake, kcal/d                    | 2277.2 (952.6) | 2277.4 (947.9)    | 2213.1 (941.6)   | 2290.7 (930.7)  | 2364.7 (1003.5)  |
| Anthropometrics                          |                |                   |                  |                 |                  |
| Weight, kg                               | 84.46 (11.82)  | 85.77 (12.43)     | 83.56 (11.42)    | 84.74 (12.43)   | 84.33 (11.24)    |
| Body mass index, kg/m <sup>2</sup>       | 31.77 (3.85)   | 32.29 (3.94)      | 31.54 (3.80)     | 31.98 (4.08)    | 31.44 (3.58)     |
| Cardiorespiratory Fitness                |                |                   |                  |                 |                  |
| Relative VO <sub>2peak</sub> , mL/kg/min | 15.37 (2.92)   | 15.56 (3.00)      | 15.44 (3.00)     | 14.70 (2.49)    | 15.77 (3.05)     |
| Absolute VO <sub>2peak</sub> , L/min     | 1.29 (0.26)    | 1.33 (0.28)       | 1.28 (0.24)      | 1.24 (0.24)     | 1.32 (0.26)      |
| Heart Rate Variability <sup>*</sup>      |                |                   |                  |                 |                  |
| rMSSD, ms                                | 22.83 (11.56)  | 23.35 (11.01)     | 23.58 (12.24)    | 23.25 (11.29)   | 20.68 (11.19)    |
| Subjective Sleep Quality                 |                |                   |                  |                 |                  |
| MOS Sleep Problems Index                 | 27.92 (18.40)  | 28.37 (19.71)     | 27.03 (17.92)    | 27.35 (18.10)   | 29.47 (18.32)    |
| Sleep disturbance, No. (%)               | 200 (46)       | 38 (41)           | 65 (43)          | 49 (49)         | 48 (51)          |

Data presented as mean (standard deviation) unless otherwise indicated. \* Samples for rMSSD

data were 351, 79, 123, 73, and 76 participants for All, Control, 4 KKW, 8 KKW, and 12 KKW groups, respectively. Abbreviations: HRT: hormone replacement therapy; KKW: kilocalories of energy expenditure per kilogram of body weight per week; MOS: Medical Outcomes Study; rMSSD: square root of the mean of the sum of the squares of differences between adjacent R-R intervals; VO<sub>2peak</sub>: peak rate of oxygen consumption.

**Table 2.** Associations Between Baseline Sleep Quality and BMI, Parasympathetic Tone, and Cardiorespiratory Fitness.

| Variable                              | MOS SPI score (95% CI) | OR of MOS SPI > 25 (95% CI) |
|---------------------------------------|------------------------|-----------------------------|
| <b>BMI (kg/m<sup>2</sup>)</b>         |                        |                             |
| Q1: ≥ 34.7                            | 27.95 (24.54, 31.36)   | 1.00 (referent)             |
| Q2: 31.7 - < 34.7                     | 24.37 (20.92, 27.82)   | 0.60 (0.35, 1.03)           |
| Q3: 28.6 - < 31.7                     | 30.48 (27.03, 33.94)   | 1.14 (0.67, 1.96)           |
| Q4: < 28.6                            | 28.85 (25.46, 32.24)   | 0.98 (0.58, 1.68)           |
| Linear <i>P</i>                       | .26                    | .53                         |
| <b>rMSSD (ms)</b>                     |                        |                             |
| Q1: < 15.0                            | 31.77 (27.95, 35.59)   | 1.00 (referent)             |
| Q2: 15.0 - < 20.9                     | 24.77 (21.04, 28.51)*  | 0.53 (0.29, 0.97)           |
| Q3: 20.9 - < 29.0                     | 25.22 (21.36, 29.09)*  | 0.43 (0.23, 0.81)           |
| Q4: ≥ 29.0                            | 26.50 (22.64, 30.35)*  | 0.46 (0.25, 0.86)           |
| Linear <i>P</i>                       | .08                    | .01                         |
| <b>VO<sub>2peak</sub> (mL/kg/min)</b> |                        |                             |
| Q1: < 13.4                            | 29.55 (25.86, 33.25)   | 1.00 (referent)             |
| Q2: 13.4 - < 15.2                     | 28.80 (25.35, 32.25)   | 1.22 (0.70, 2.13)           |
| Q3: 15.2 - < 17.0                     | 28.60 (25.05, 32.15)   | 1.04 (0.58, 1.87)           |
| Q4: ≥ 17.0                            | 24.91 (21.41, 28.42)   | 0.63 (0.34, 1.14)           |
| Linear <i>P</i>                       | .10                    | .09                         |

Continuous baseline MOS SPI scores (left panels) and odds ratios of having significant sleep disturbance at baseline (MOS SPI > 25) (right panels) across quartiles of baseline BMI, rMSSD, and VO<sub>2peak</sub>. All analyses adjusted for age, BMI, sleep medication use, and HRT use, except when the covariate quartile was the independent variable. \* indicates significant difference ( $P \leq .05$ ) in MOS SPI score compared to quartile 1 (referent group). Abbreviations: BMI: body mass index; CI: confidence interval; MOS: Medical Outcomes Study; Q: quartile; rMSSD: square root of the mean of the sum of the squares of differences between adjacent R-R intervals; SPI: Sleep Problems Index; VO<sub>2peak</sub>: peak rate of oxygen consumption.

**Table 3.** Prevalence and Odds of Significant Sleep Disturbance (i.e., MOS SPI > 25) at Post-Intervention.

|                            | Prevalence   | Model 1           | Model 2           | Model 3           | Model 4           |
|----------------------------|--------------|-------------------|-------------------|-------------------|-------------------|
|                            | <i>n</i> (%) | OR (95% CI)       | OR (95% CI)       | OR (95% CI)       | OR (95% CI)       |
| Control                    | 41 (45%)     | 1.00 (referent)   | 1.00 (referent)   | 1.00 (referent)   | 1.00 (referent)   |
| 4 KKW                      | 46 (31%)     | 0.37 (0.19, 0.73) | 0.37 (0.19, 0.73) | 0.34 (0.19, 0.73) | 0.37 (0.19, 0.73) |
| 8 KKW                      | 33 (33%)     | 0.36 (0.17, 0.77) | 0.36 (0.17, 0.77) | 0.32 (0.17, 0.77) | 0.36 (0.17, 0.77) |
| 12 KKW                     | 31 (33%)     | 0.34 (0.16, 0.72) | 0.34 (0.16, 0.72) | 0.28 (0.16, 0.72) | 0.34 (0.16, 0.72) |
| Linear trend <i>P</i>      |              | .01               | .01               | .006              | .02               |
| Weight change              |              | ---               | 1.00 (0.93, 1.08) | ---               | ---               |
| VO <sub>2peak</sub> change |              | ---               | ---               | 1.10 (0.95, 1.26) | ---               |
| rMSSD change               |              | ---               | ---               | ---               | 1.01 (0.98, 1.04) |

Model 1 adjusted for age, BMI, sleep medication use, hormone replacement therapy use, and

baseline sleep quality (SPI ≤ 25, SPI > 25); Model 2 adjusted for change in body weight in

addition to variables included in Model 1; Model 3 adjusted for change in VO<sub>2peak</sub> in addition to

variables included in Model 1; Model 4 adjusted for change in rMSSD in addition to variables

included in Model 1. Abbreviations: CI: confidence interval; KKW: kilocalories of energy

expenditure per kilogram of body weight per week; OR: odds ratio; rMSSD: square root of the

mean of the sum of the squares of differences between adjacent R-R intervals; VO<sub>2peak</sub>: peak rate

of oxygen consumption.

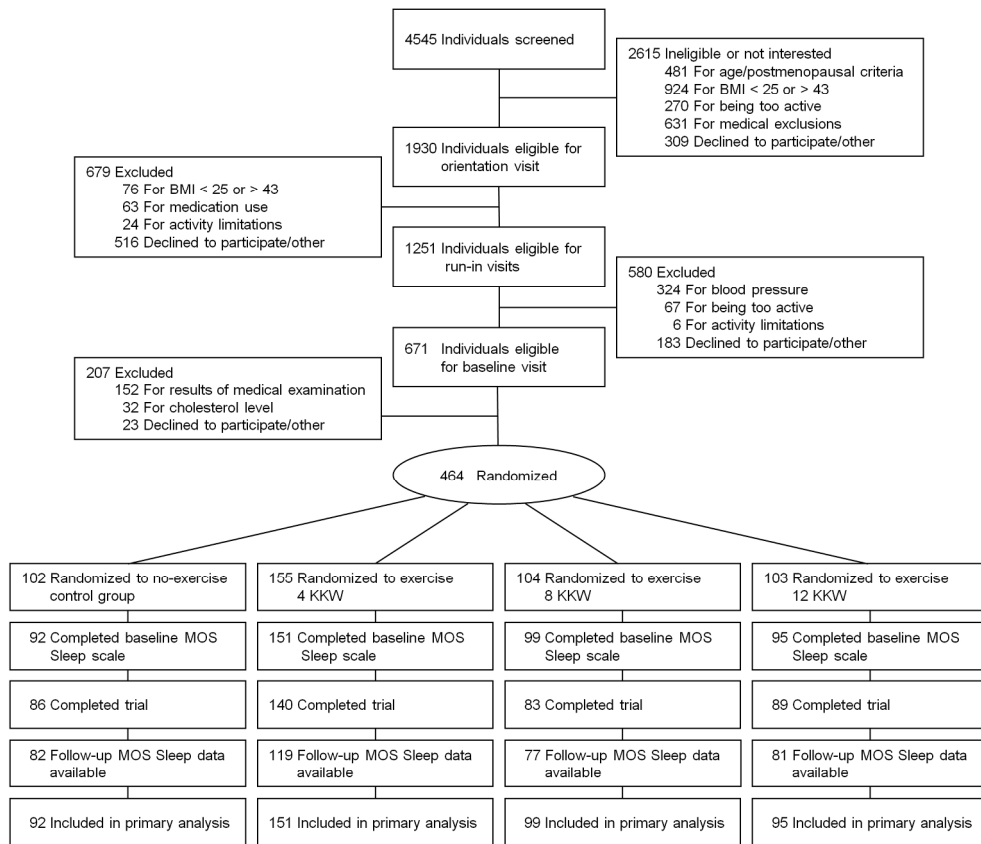

Figure 1. Participant screening and study flow. Of 4545 screened for participation, 464 postmenopausal women were randomised to one of four treatments. Baseline MOS Sleep data were available for 437 participants; those who discontinued the study or without follow-up MOS Sleep data had baseline data carried forward for analysis. BMI: body mass index; KKW: kilocalories of energy expenditure per kilogram of body weight per week; MOS: Medical Outcomes Study.

215x187mm (279 x 279 DPI)

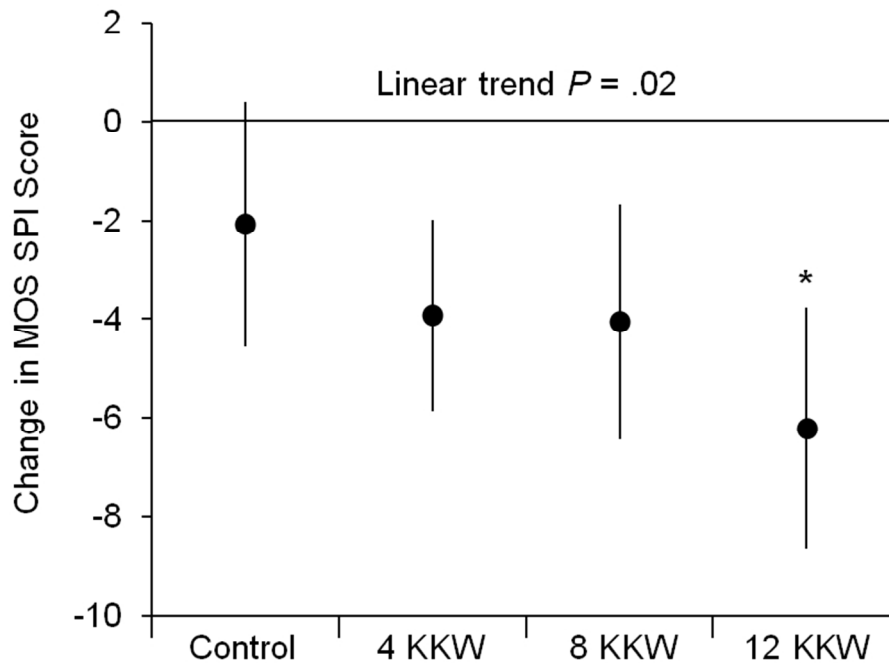

Figure 2. Change in MOS Sleep Problems Index scores among treatment groups. Data presented as least-squares means  $\pm$  95% confidence intervals. Analyses adjusted for age, BMI, sleep medication use, hormone replacement therapy use, and baseline MOS SPI score. \* Indicates difference from control ( $P = .02$ ). KKW: kilocalories of energy expenditure per kilogram of body weight per week; MOS: Medical Outcomes Study. 82x65mm (279 x 279 DPI)

1  
2  
3  
4  
5  
6  
7  
8  
9  
10  
11  
12  
13  
14  
15  
16  
17  
18  
19  
20  
21  
22  
23  
24  
25  
26  
27  
28  
29  
30  
31  
32  
33  
34  
35  
36  
37  
38  
39  
40  
41  
42  
43  
44  
45  
46  
47  
48  
49  
50  
51  
52  
53  
54  
55  
56  
57  
58  
59  
60

**Dose-Response Effects of Exercise Training on the Subjective Sleep Quality of Postmenopausal Women: ~~A~~Exploratory Analyses of a Randomised Controlled Trial**

Christopher E. Kline,<sup>1</sup> Xuemei Sui,<sup>2</sup> Martica Hall,<sup>1</sup> Shawn D. Youngstedt,<sup>2,3,4</sup>

Steven N. Blair,<sup>2,5</sup> Conrad P. Earnest,<sup>6</sup> Timothy S. ~~Church~~<sup>6</sup>Church<sup>7</sup>

<sup>1</sup> *Department of Psychiatry, University of Pittsburgh School of Medicine, Pittsburgh, PA USA;*

<sup>2</sup> *Department of Exercise Science, University of South Carolina, Columbia, SC USA;*

<sup>3</sup> *WJB Dorn VA Medical Center, Columbia, SC USA;*

<sup>4</sup> *Department of Psychology, University of South Carolina, Columbia, SC USA;*

<sup>5</sup> *Department of Epidemiology and Biostatistics, University of South Carolina, Columbia, SC*

*USA;*

<sup>6</sup> *Department for Health, University of Bath, Bath, UK;*

<sup>7</sup> *Department of Preventive Medicine, Pennington Biomedical Research Center, Louisiana State University, Baton Rouge, LA USA.*

**Corresponding Author:** Christopher E. Kline, Ph.D., Department of Psychiatry, University of

Pittsburgh School of Medicine, 3811 O'Hara Street, Pittsburgh, PA 15213; tel.: 412-578-

9554; fax: 412-246-5300; e-mail: klinec@upmc.edu.

**Key words:** exercise, sleep, postmenopausal, exercise training

**Main text word count:** 37293755

## ABSTRACT

**Objective:** To investigate whether a dose-response relationship existed between exercise and subjective sleep quality in postmenopausal women. This objective represents a post-hoc assessment which was not previously considered.

**Design:** Parallel group randomised controlled trial.

**Setting:** Clinical exercise physiology laboratory in Dallas, Texas.

**Participants:** 437 sedentary overweight/obese postmenopausal women ~~with baseline sleep data (out of 464 enrolled for participation).~~

**Intervention:** Participants were randomised to 1 of 4 treatments, each of 6 months' duration: a non-exercise control treatment ( $n=92$ ) or one of three dosages of moderate-intensity exercise (50% of  $VO_{2peak}$ ), designed to meet 50% ( $n=151$ ), 100% ( $n=99$ ), or 150% ( $n=95$ ) of NIH Consensus Development Panel physical activity recommendations. Exercise dosages were structured to elicit energy expenditures of 4, 8 or 12 kilocalories per kilogram of body weight per week (KKW), respectively. Analyses were intent-to-treat.

**Primary outcome measures:** Continuous scores and odds of having significant sleep disturbance, as assessed by the Sleep Problems Index from the 6-item Medical Outcomes Study (MOS) Sleep Scale. Outcome assessors were blinded to participant randomisation assignment.

**Results:** Change in the MOS Sleep Problems Index score significantly differed by treatment group (control: -2.09 [95% confidence interval, -4.58 to 0.40], 4 KKW: -3.93 [-5.87 to -1.99], 8 KKW: -4.06 [-6.45 to -1.67], 12 KKW: -6.22 [-8.68 to -3.77];  $P=.04$ ), with a significant dose-response trend observed ( $P=.02$ ). Exercise training participants had lower odds of having significant sleep disturbance at post-intervention compared to control (4 KKW OR: 0.37 [0.19 to 0.73], 8 KKW: 0.36 [0.17 to 0.77], 12 KKW: 0.34 [0.16 to 0.72]). The magnitude of weight loss



1  
2  
3 did not differ between treatment conditions. Improvements in sleep quality were not related to  
4  
5 changes in body weight, resting parasympathetic control, or cardiorespiratory fitness.  
6  
7

8 **Conclusion:** Exercise training induced significant improvement in subjective sleep quality in  
9  
10 postmenopausal women, with even a low dose of exercise resulting in greatly reduced odds of  
11  
12 having significant sleep disturbance.  
13

14  
15 **Trial registration:** [clinicaltrials.gov](https://clinicaltrials.gov) identifier: NCT00011193.  
16  
17  
18  
19  
20  
21  
22  
23  
24  
25  
26  
27  
28  
29  
30  
31  
32  
33  
34  
35  
36  
37  
38  
39  
40  
41  
42  
43  
44  
45  
46  
47  
48  
49  
50  
51  
52  
53  
54  
55  
56  
57  
58  
59  
60

## ARTICLE SUMMARY

### Article Focus:

- Sleep disturbance is prevalent in postmenopausal women, with 35-60% reporting significant sleep problems.
- Effective, safe and easily available treatment options for disturbed sleep in postmenopausal women are lacking.
- There has been equivocal evidence as to whether exercise improves sleep in postmenopausal women, though possible dose-response effects have been noted.

### Key Messages:

- Exercise resulted in significant improvement in subjective sleep quality in postmenopausal women, with reduced odds of having sleep disturbance at post-intervention with even 50% of the recommended dose of exercise for adults.
- The effects of exercise on sleep quality were independent of changes in body weight, resting parasympathetic control, or cardiorespiratory fitness.

### Strengths and Limitations:

- The study constitutes the largest randomised controlled trial on exercise and sleep quality, using a structured dose of exercise and a validated measure of sleep quality.
- Only self-reported sleep was assessed; objective measurement of sleep, with either actigraphy or polysomnography, was not conducted.
- Despite the high prevalence of sleep disturbance in the sample, participants were not selected on the basis of sleep complaints.

## INTRODUCTION

Disturbed sleep is a common complaint among women, with increasing prevalence beginning at the menopausal transition. Postmenopausal women are more likely to report sleep problems than premenopausal or perimenopausal women,[1] with 35-60% of postmenopausal women reporting significant sleep problems.[2] The first-line treatment options for sleep complaints, hypnotic medication and cognitive behavioral therapy, have associated concerns about the safety of long-term use or treatment availability, respectively.[3,4] Furthermore, results are conflicting on the effect of hormone replacement therapy (HRT) on sleep quality,[5,6] despite the effectiveness of HRT at reducing other menopausal symptoms.

A nonpharmacological treatment that has been traditionally thought to improve sleep is exercise. In epidemiologic research, exercise has frequently been associated with better sleep.[7] However, experimental research has provided less compelling evidence,[8] particularly when regarding postmenopausal women. Of the four randomised trials that have investigated the effect of exercise on sleep quality in this population,[9-12] only one reported a significant improvement in subjective sleep quality following an exercise intervention.[12] However, despite the generally negative findings from these studies involving postmenopausal women, possible dose-response effects of exercise on sleep quality were noted. In one of these studies, women who performed at least 225 minutes of morning exercise per week had less trouble falling asleep compared to those who exercised less than 180 minutes per week in the morning.[9] Likewise, another study reported a positive association between walking frequency and improvements in sleep.[11]

To our knowledge, no research has directly investigated the effects of different doses of exercise on sleep quality. The Dose-Response to Exercise in postmenopausal Women (DREW) trial was conducted to investigate the health effects of 50%, 100%, and 150% of the NIH

1  
2  
3 Consensus Development Panel physical activity recommendations in a group of sedentary  
4  
5 postmenopausal women.[13] Results on the primary outcomes of the study, cardiorespiratory  
6  
7 fitness and blood pressure, have already been reported.[14] Subjective sleep quality was also  
8  
9 assessed in this trial as an exploratory outcome, and the data provided herein provides the first  
10  
11 systematic examination of whether a dose-response relationship exists between exercise and  
12  
13 subjective sleep quality. It was hypothesised that, in comparison to a non-exercise control group,  
14  
15 subjective sleep quality would improve with increasing dosage of exercise.  
16  
17  
18

## 19 20 METHODS

21  
22 A complete description of the recruitment and screening procedures has been published  
23  
24 elsewhere.[13] Briefly, the study was a randomised, controlled, multi-arm parallel group trial in  
25  
26 which the primary outcomes were examining whether there were dose-response effects on  
27  
28 cardiorespiratory fitness and blood pressure with incrementally increasing doses of energy  
29  
30 expenditure.[13,14] The study was approved annually by the Cooper Institute Institutional  
31  
32 Review Board, and written informed consent was obtained by all participants prior to study  
33  
34 involvement.  
35  
36  
37

### 38 39 Participants

40  
41 Participants were recruited from the Dallas, Texas, metropolitan area from April 2001 to  
42  
43 June 2005. Of 4545 women screened for eligibility, those who were aged 45-75 years,  
44  
45 postmenopausal, sedentary ( $\leq 20$  min of exercise on  $\leq 2$  days/week and  $< 8000$  steps/day,  
46  
47 averaged over one week), overweight or obese (body mass index [BMI] of 25-43 kg/m<sup>2</sup>), and  
48  
49 had normal to mildly elevated resting blood pressure (systolic blood pressure [SBP] of 120-159  
50  
51 mm Hg and diastolic blood pressure [DBP]  $\leq 99$  mm Hg) were eligible to participate (Figure 1).  
52  
53  
54  
55 Exclusion criteria included significant cardiovascular disease, recent hospitalisation for mental  
56  
57  
58  
59  
60

1  
2  
3 illness or significant symptoms of depression (score  $\geq 10$  on the Center for Epidemiologic  
4  
5 Studies Depression scale), or any other health condition that would contraindicate participation  
6  
7 in an exercise program. Overall, 464 women were randomised to treatment, with baseline sleep  
8  
9 data available for 437 participants.  
10  
11

### 12 **Randomisation and Retention**

14  
15 Prior to randomisation, participants completed a two-week run-in period, in which  
16  
17 participants received lifestyle modification instruction over the course of six laboratory visits.  
18  
19 The primary purpose of this run-in period was to maximise retention and adherence to the  
20  
21 subsequent intervention. Participants were compensated for completing baseline and post-  
22  
23 intervention assessments, with additional compensation based on intervention adherence.[13]  
24  
25  
26

27 Allocation of participants to treatment conditions was accomplished using a computer-  
28  
29 generated randomisation sequence, determined from randomly permuted blocks of equal length  
30  
31 with fixed numbers of treatment allotments to balance treatment enrollments over time.  
32  
33

34 Allocation concealment was achieved by placing treatment assignment letters into sequentially  
35  
36 numbered opaque envelopes sealed by the study statistician. At the time of randomisation,  
37  
38 envelopes were opened by a staff member not affiliated with the randomisation process.[13]  
39  
40

41 Participants were randomised to one of four treatment conditions: a non-exercise control  
42  
43 group, or one of three exercise groups expending 4, 8, or 12 kilocalories per kilogram of body  
44  
45 weight per week (KKW). Energy expenditure levels for the exercise groups were designed to  
46  
47 correspond with 50%, 100%, and 150% of the NIH Consensus Development Panel physical  
48  
49 activity recommendations, respectively.[15]  
50  
51

### 52 **Interventions**

53  
54  
55  
56  
57  
58  
59  
60

1  
2  
3 Women assigned to the exercise groups participated in 3-4 training sessions/week for 6  
4 months, alternating between semirecumbent cycle ergometer and treadmill exercise. Training  
5 sessions were conducted in a supervised laboratory setting, and exercise dosage was closely  
6 monitored for each session. Training intensity was moderate, set at the heart rate associated with  
7 50% of each woman's  $VO_{2peak}$  and continuously monitored by heart rate telemetry. To determine  
8 the number of calories that needed to be expended each week, participants were weighed weekly  
9 and their weight was multiplied by the exercise dosage.  
10  
11  
12  
13  
14  
15  
16  
17  
18

19 Exercise dose was gradually increased to minimise injury risk. All exercise training  
20 groups expended 4 KKW during the first intervention week, with the 4-KKW group continuing  
21 at that dose for 6 months. The 8- and 12-KKW groups increased their energy expenditure by 1  
22 KKW until they reached their appointed exercise doses.  
23  
24  
25  
26  
27  
28

### 29 **Blinding**

30 Although participants could not be blinded to their treatment, staff were separated into  
31 intervention and assessment teams to ensure blinding of all assessment staff to participant  
32 randomisation assignment. Participants were consistently reminded to refrain from discussing  
33 their randomisation assignments with outcome assessment staff.  
34  
35  
36  
37  
38  
39  
40

### 41 **Sleep Measure**

42 Subjective sleep quality was assessed with six items from the Medical Outcomes Study  
43 (MOS) Sleep Scale.[16] At baseline and post-intervention, participants were asked to respond  
44 based on their sleep during the previous four weeks. One question, which addressed the length of  
45 time to fall asleep, was framed with five response options ranging from 0-15 minutes to > 60  
46 minutes. For the remaining five questions (i.e., restless sleep, daytime drowsiness, difficulty  
47 falling asleep, awakening from sleep and experiencing difficulty returning to sleep, staying  
48  
49  
50  
51  
52  
53  
54  
55  
56  
57  
58  
59  
60

1  
2  
3 awake during the day), participants were asked to respond on a 5-point scale, ranging from “none  
4 of the time” to “all of the time”. Item responses were assigned scores using conventional scoring  
5 rules, with higher scores indicating a greater severity of sleep disturbance. A modified Sleep  
6 Problems Index (SPI), utilising all six sleep items, provided a measure of overall sleep  
7 quality.[17] SPI scores greater than 25 were considered to indicate significant sleep disturbance,  
8 as prior work utilising a 9-item SPI reported that a cutpoint of > 25 identified individuals who  
9 considered themselves to have a sleep problem with a sensitivity of 86.2% and specificity of  
10 66.3%.[17]

11  
12 Scores on the MOS Sleep Scale have been shown to correlate with other MOS health  
13 items,[16] differentiate between those with and without chronic health conditions,[17] and  
14 improve with treatment of chronic health conditions.[18] Normative values for the general  
15 population have also been developed.[17]

### 31 **Other Measures**

32  
33 Baseline demographic and health characteristics were assessed by completion of a  
34 comprehensive medical history questionnaire. Height and weight were measured with a  
35 calibrated stadiometer and electronic scale, respectively. Diet was assessed before and following  
36 the intervention using a semi-quantitative food frequency questionnaire, whereas unsupervised  
37 physical activity was monitored throughout the study with a pedometer (Accusplit Eagle, Japan).

38  
39 Cardiorespiratory fitness ( $VO_{2peak}$ ) was assessed from maximal exercise testing using a  
40 cycle ergometer (Excalibur Sport, Lode Medical Technology, Groningen, Netherlands), as  
41 previously described.[14] Testing was performed twice at baseline and twice at post-  
42 intervention, with values from each timepoint averaged. Heart rate variability (HRV) was  
43 measured from the final 5 min of a 25-min resting assessment, as previously described.[19] The  
44  
45  
46  
47  
48  
49  
50  
51  
52  
53  
54  
55  
56  
57  
58  
59  
60

1  
2  
3 square root of the mean of the sum of the squares of differences between adjacent R-R intervals  
4  
5 (rMSSD), a marker of parasympathetic activity,[20] was retained for analysis.  
6  
7

### 8 **Statistical Power**

9  
10 Sample size was originally based on having adequate power to detect changes in the  
11 primary outcomes of the overall study,  $VO_{2peak}$  and blood pressure.[14] Additional participants  
12 were allocated to the 4 KKW condition to increase statistical power for detecting smaller  
13 anticipated fitness gains in this group. Because sleep was not a primary outcome in the design of  
14 the original study, there was no opportunity before data collection to investigate sample size or  
15 power for this outcome variable. Nevertheless, given the current enrollment, the study had 84%  
16 power (assuming two-tailed  $\alpha = 0.05$ ) to detect an effect size of 0.20 for MOS SPI score  
17 reduction.  
18  
19  
20  
21  
22  
23  
24  
25  
26  
27  
28

### 29 **Statistical Analysis**

30  
31 Baseline sleep quality was compared against normative data[17] using a one-sample *t*-  
32 test. Continuous MOS SPI values were examined across quartiles of BMI, parasympathetic tone  
33 (rMSSD), and cardiorespiratory fitness ( $VO_{2peak}$ ) with analysis of covariance (ANCOVA),  
34 controlling for age, BMI, sleep medication use, and HRT use. The likelihood of having  
35 significant sleep disturbance at baseline (i.e., MOS SPI > 25) was evaluated with logistic  
36 regression across the same quartiles using the same covariates.  
37  
38  
39  
40  
41  
42  
43  
44  
45

46 Two primary outcomes were evaluated for the current study: (1) change in continuous  
47 MOS SPI score across treatment groups; (2) odds of having significant sleep disturbance at post-  
48 intervention across treatment groups. Change in continuous MOS SPI scores across groups was  
49 tested by ANCOVA, with adjustment for age, BMI, sleep medication use, HRT use, and baseline  
50 MOS SPI values. All assumptions underlying the ANCOVA models were checked and verified  
51  
52  
53  
54  
55  
56  
57  
58  
59  
60



1  
2  
3 | to be met. Individual treatment groups were compared to the control group with Tukey-Kramer  
4  
5 adjustment for multiple comparisons. An  $\alpha$  level of .05 was used because it was our *a priori*  
6  
7 intention to compare only the separate treatment groups with the control group. Dose-response  
8  
9 trends were analysed using least-squares regression of MOS SPI change across groups. Logistic  
10  
11 regression examined the odds of having significant sleep disturbance at post-intervention,  
12  
13 following adjustment for age, BMI, sleep medication and HRT use, and baseline sleep  
14  
15 disturbance ( $SPI > 25$ ,  $SPI \leq 25$ ). Unadjusted analyses provided similar results to those with  
16  
17 covariate control, so only those results with full covariate adjustment were reported.  
18  
19

20  
21  
22 Finally, to examine whether improved sleep quality was significantly influenced by body  
23  
24 weight, parasympathetic tone, or cardiorespiratory fitness, changes in weight, rMSSD, and  
25  
26  $VO_{2peak}$  were added to the ANCOVA and logistic regression analyses. Additionally, among  
27  
28 completed participants, changes in MOS SPI score were evaluated across quartiles of change in  
29  
30 body weight, rMSSD, and  $VO_{2peak}$  following adjustment for age, treatment, BMI, sleep  
31  
32 medication use, HRT use, and baseline MOS SPI score.  
33  
34

35  
36  
37 Analyses were limited to participants with baseline MOS Sleep data. Primary analyses  
38  
39 were conducted using the intent-to-treat principle; if post-intervention data were missing,  
40  
41 baseline values were carried forward for analysis. When analyses were restricted to only those  
42  
43 participants with baseline and post-intervention MOS Sleep data ( $n = 359$ ), results were not  
44  
45 substantively changed; therefore similarly, when missing post-intervention data were imputed  
46  
47 with mean values, results were unchanged. Therefore, only intent-to-treat analyses were  
48  
49 presented. All analyses were performed using SAS version 9.2 (SAS Institute, Cary, NC). All  
50  
51 tests were two-tailed, with statistical significance set at  $P \leq .05$ .  
52  
53  
54

## 55 RESULTS

56  
57  
58  
59  
60

## Participant Characteristics

A summary of participant characteristics is provided in Table 1. Mean age and BMI of the 437 participants were  $57.3 \pm 6.5$  yr and  $31.8 \pm 3.9$  kg/m<sup>2</sup>, respectively.

Baseline MOS SPI values and prevalence of sleep disturbance are provided in Table 1. Of the 437 participants, 46% of the sample ( $n = 200$ ) were considered to have significant sleep disturbance at baseline, as defined as MOS SPI > 25. Baseline sleep quality of the participants was significantly worse than normative values[17] (normative value: 25.79;  $t_{436} = 2.42$ ,  $P = .02$ ), a magnitude of 0.12 SD.[21]

Baseline continuous MOS SPI values and odds of sleep disturbance across quartiles of BMI, rMSSD, and VO<sub>2peak</sub> are shown in Table 2. Sleep quality significantly differed among quartiles of rMSSD ( $F_{3,343} = 2.55$ ,  $P = .05$ ), with the lowest quartile of rMSSD having significantly worse baseline sleep quality than the other quartiles of rMSSD. Similarly, each quartile of rMSSD was associated with lower odds of having significant sleep disturbance at baseline compared to the lowest quartile of rMSSD. No differences in MOS SPI values or odds of having significant sleep disturbance were observed across quartiles of BMI or VO<sub>2peak</sub>.

## Exercise Training Adherence, Diet and Unsupervised Activity

Treatment adherence was calculated as the percentage of exercise energy expenditure achieved compared to the amount of exercise energy expenditure that was prescribed. Adherence was similar between exercise groups (4 KKW:  $95.1 \pm 16.1\%$ , 8 KKW:  $88.5 \pm 26.1\%$ , 12 KKW:  $92.5 \pm 20.9\%$ ), as previously reported.[14]

Changes in diet and unsupervised activity have been previously reported.[14,22] Pre- to post-intervention changes in energy intake did not differ between treatment conditions.

Pedometer-assessed unsupervised activity ranged from 4766 to 5067 steps/day at baseline and

1  
2  
3 did not differ between groups. Compared to baseline, daily steps increased for each group at  
4 month 1 (each  $P < .05$ ), with greater steps in the control group than the three exercise groups  
5 (each  $P < .05$ ). However, no differences in daily steps between the control and exercise groups  
6 were observed by months 5 and 6. Among the exercise groups, daily steps did not change from  
7 months 1 through 6. Therefore, the results reported here are unlikely to be due to changes in diet  
8 or spontaneous activity outside the exercise training laboratory.  
9

### 17 **Changes in Sleep Quality with Exercise Training**

19  
20 Changes in sleep quality with exercise training are depicted in Figure 2. A significant  
21 effect of the intervention was noted in the full model ( $F_{8,428} = 17.35, P < .001$ ), with treatment  
22 group being an independent predictor of change in continuous MOS SPI score ( $F_{3,428} = 2.79, P =$   
23  $.04$ ) following control for age, BMI, HRT use, sleep medication use, and baseline MOS SPI  
24 values. Moreover, a significant linear dose-response effect was found for MOS SPI scores across  
25 treatment groups ( $P = .02$ ). When compared against control, a significantly greater improvement  
26 in MOS SPI score was found for the 12-KKW group ( $P = .02$ ).  
27  
28

29  
30 The association between sleep disturbance (i.e., MOS SPI > 25) at post-intervention and  
31 treatment is summarised in Table 3. Compared to control and following covariate adjustment,  
32 each exercise training group had lower odds of having significant sleep disturbance following the  
33 intervention, with the odds of having significant sleep disturbance decreasing while exercise  
34 dose increased (linear trend  $P = .01$ ).  
35  
36

### 48 **Influences of Change in Weight, Fitness, and Parasympathetic Tone on Sleep**

49  
50 Post-intervention changes in body weight, parasympathetic tone, and cardiorespiratory  
51 fitness for the overall DREW sample have been previously reported.[14,19] In the present  
52 study's sample, the magnitude of weight loss did not differ between treatment groups (control: -  
53  
54  
55  
56  
57  
58  
59  
60

1  
2  
3 1.08 [3.70], 4 KKW: -1.23 [3.43], 8 KKW: -1.60 [3.23], 12 KKW: -1.25 [2.83] kg;  $F_{3,433} = 0.43$ ,  
4  
5  $P = .73$ ). Cardiorespiratory fitness improved with exercise training in a dose-dependent manner  
6  
7 (control: -0.20 [1.88], 4 KKW: 0.59 [1.83], 8 KKW: 1.13 [1.54], 12 KKW: 1.42 [1.79]  
8  
9 mL/kg/min;  $F_{3,433} = 15.32$ ,  $P < .001$ ). Among those with usable HRV and sleep data ( $n = 351$ ),  
10  
11 rMSSD improved in a dose-dependent fashion with exercise training (control: 0.20 [8.45], 4  
12  
13 KKW: 2.72 [9.20], 8 KKW: 3.72 [11.47], 12 KKW: 5.29 [9.51] ms;  $F_{3,347} = 3.82$ ,  $P = .01$ ).  
14  
15  
16  
17 When added to the model analysing differences in continuous MOS SPI change among treatment  
18  
19 groups, none of these covariates were significant ( $P \leq .14$ ), and inclusion of these variables did  
20  
21 not alter the previously noted treatment group differences or linear dose-response effects. When  
22  
23 individually added to logistic regression analyses, none of these covariates significantly affected  
24  
25 the odds of having significant sleep disturbance at post-intervention (Table 3). In addition, when  
26  
27 change in MOS SPI was evaluated across quartiles of change in body weight, rMSSD, or  
28  
29  $VO_{2peak}$ , no significant-between group differences were noted (data not shown). Finally, change  
30  
31 in MOS SPI did not correlate with change in body weight, rMSSD or  $VO_{2peak}$  ( $r < .03$ ,  $P > .58$ ).  
32  
33  
34  
35

## 36 DISCUSSION

37  
38 The key finding from exploratory analyses of the DREW randomised controlled trial was  
39  
40 that exercise training significantly improved subjective sleep quality in overweight/obese  
41  
42 postmenopausal women. Specifically, we observed a dose-response trend for the continuous  
43  
44 MOS SPI values and, perhaps most notably, significantly reduced odds of having sleep  
45  
46 disturbance at post-intervention with even 50% of the recommended dose of exercise for adults.  
47  
48 Interestingly, the improvements in sleep quality were not related to changes in body weight,  
49  
50 parasympathetic tone, or cardiorespiratory fitness.  
51  
52  
53  
54

### 55 Previous research

1  
2  
3 Previous research with postmenopausal women had yielded conflicting findings  
4 regarding whether exercise improved sleep.[9-12] While suggested by prior studies in this  
5 population,[9,11] the present study is the first to document a dose-response relationship between  
6 exercise and improved subjective sleep quality. Although sleep was an exploratory outcome of  
7 the DREW study, it is the largest clinical trial to date that has examined the relationship between  
8 aerobic exercise dose and sleep quality. Our current findings mirror the overall body of research  
9 indicating that exercise improves sleep, most prominently in those with existing sleep  
10 disturbances.[8]  
11  
12  
13  
14  
15  
16  
17  
18  
19  
20  
21

### 22 **Clinical implications**

23  
24 When considering the improvements in continuous MOS SPI scores following exercise  
25 training, the clinical significance is uncertain. The observation that only those who exercised at a  
26 12-KKW dose experienced a significant improvement in sleep quality compared to control may  
27 be viewed as discouraging, as this dose equated to approximately 190 min/wk of moderate-  
28 intensity aerobic exercise[14] and many individuals may not be willing to perform that much  
29 exercise to improve sleep. However, the significant dose-response effect suggests that any dose  
30 of exercise should benefit sleep, albeit with larger effects noted with higher levels of energy  
31 expenditure.  
32  
33  
34  
35  
36  
37  
38  
39  
40  
41  
42

43 In contrast, the greatly reduced odds of having significant sleep disturbance following  
44 exercise training suggests that exercise may hold the most promise as a treatment option for  
45 postmenopausal women with significant sleep disturbance. In particular, even an exercise dose  
46 consisting of 50% of the NIH Consensus Panel physical activity recommendations significantly  
47 reduced the odds of having a post-intervention MOS SPI > 25. This is noteworthy, since sleep  
48 complaints are prevalent in postmenopausal women[1] and current treatment options, such as  
49  
50  
51  
52  
53  
54  
55  
56  
57  
58  
59  
60

1  
2  
3 HRT and hypnotic medication, have often been found to be only mildly efficacious at improving  
4 sleep quality compared to placebo in postmenopausal women.[6,23]  
5  
6

7  
8 The mechanisms by which exercise may improve subjective sleep quality in  
9  
10 postmenopausal women are unknown. Although the present study was not specifically designed  
11 to address mechanisms of effect, secondary analyses focused on changes in three variables which  
12 have been shown to be related to sleep: body weight, parasympathetic activity, and  
13 cardiorespiratory fitness. There is a clear association between obesity and disturbed sleep,[24]  
14 and weight loss has been found to reduce sleep complaints.[25] Likewise, poor sleepers have  
15 been found to have impaired sleep HRV,[26] and exercise training has been well-documented to  
16 improve autonomic function.[27] Finally, physical fitness has been previously associated with  
17 sleep quality,[28] and greater improvements in fitness have been associated with better sleep  
18 outcomes in some experimental studies.[9,12]  
19  
20  
21  
22  
23  
24  
25  
26  
27  
28  
29  
30

31  
32 Nonetheless, in the present study, changes in body weight, parasympathetic tone, or  
33 cardiorespiratory fitness were not significantly related to changes in sleep, whether assessed by  
34 covariate control, change in sleep quality across quartiles of change in these variables, or  
35 correlations between change in these variables and change in sleep quality. Although significant  
36 improvements were noted for rMSSD and  $VO_{2peak}$  following exercise training in this  
37 sample,[14,19] the variability associated with the sleep measure used in the current study may  
38 have masked any possible associations. The present study suggests that exercise training can  
39 result in improved sleep quality independent of weight loss, increased fitness, or improved  
40 autonomic balance.  
41  
42  
43  
44  
45  
46  
47  
48  
49  
50  
51

## 52 **Strengths and weaknesses**

53  
54  
55  
56  
57  
58  
59  
60

1  
2  
3  
4  
5  
6  
7  
8  
9  
10  
11  
12  
13  
14  
15  
16  
17  
18  
19  
20  
21  
22  
23  
24  
25  
26  
27  
28  
29  
30  
31  
32  
33  
34  
35  
36  
37  
38  
39  
40  
41  
42  
43  
44  
45  
46  
47  
48  
49  
50  
51  
52  
53  
54  
55  
56  
57  
58  
59  
60

Strengths of the study include a randomised controlled design, closely supervised intervention, use of a validated measure of sleep quality, and the largest experimental sample size to investigate the effects of exercise on sleep. The study population was another strength, as the prevalence of disturbed sleep was high. Finally, assessment of variables that are related to sleep quality and may contribute to improved sleep following exercise training was another strength of the study.

A limitation of the study is that sleep quality was not a primary outcome of the original DREW trial. Therefore, results should be interpreted cautiously. Another study limitation is that sleep was not objectively assessed (i.e., via wrist actigraphy or polysomnography). Because of the subjective nature of the outcome and impossibility of blinding participants to their treatment, improvements in self-reported sleep quality may have been subject to expectancy effects, as exercise is commonly believed to improve sleep quality.[7] However, the finding of a significant linear trend between exercise dose and improvement in sleep quality would not necessarily be expected. Moreover, that sleep was not a primary outcome of interest and part of a wide range of study assessments further reduces the chance of expectancy or demand biases. Additionally, there is growing recognition of the merit of assessing subjective sleep quality.[29] For instance, in contrast with subjective sleep quality, objective sleep has not been found to be altered across the menopausal transition.[30] Furthermore, impaired subjective sleep quality is what prompts search for treatment, and recent evidence suggests that traditional objective sleep measures might be inadequate for detecting subtle indicators of disturbed sleep.[31] It is also noteworthy that subjective sleep quality has been associated with quality of life and physical and mental health in postmenopausal women.[32]

1  
2  
3 A lack of assessment of obstructive sleep apnoea (OSA) was another limitation. Although  
4  
5 OSA is considered to be a male-dominated sleep disorder, postmenopausal OSA prevalence is  
6  
7 similar between males and females.[33] Moreover, excess weight is the primary cause of OSA  
8  
9 for most adults,[34] which would place this overweight/obese sample at even higher risk for  
10  
11 OSA. Evidence suggests that exercise, in the absence of more established treatments or  
12  
13 significant weight loss, is moderately efficacious at reducing OSA severity and improving  
14  
15 sleep.[35] However, dose-response effects of exercise on OSA severity are unknown.  
16  
17  
18

19  
20 Finally, because aerobic activity was the only mode of exercise studied in the DREW  
21  
22 trial, the possible effects of resistance exercise on sleep quality could not be examined in this  
23  
24 sample. Resistance training has been shown to improve sleep quality,[36] though there has been  
25  
26 minimal work comparing different doses of resistance exercise on sleep quality.[37]  
27  
28

## 29 **Conclusions**

30  
31 In summary, in a sample of overweight/obese postmenopausal women, exercise training  
32  
33 significantly reduced the odds of having significant sleep disturbance. These improvements in  
34  
35 sleep were independent of the effects of exercise training on body weight, parasympathetic tone,  
36  
37 or cardiorespiratory fitness. Additional research with more comprehensive measurement of sleep  
38  
39 is warranted, but exercise training appears to significantly improve sleep quality in  
40  
41 postmenopausal women.  
42  
43  
44  
45  
46  
47  
48  
49  
50  
51  
52  
53  
54  
55  
56  
57  
58  
59  
60



## ACKNOWLEDGMENTS

We thank the DREW participants and the Cooper Institute staff for their efforts on this study.

**Contributors:** TSC and SNB designed and organised the study. TSC, CPE, and SNB collected the data. CEK and XS performed the statistical analyses. CEK wrote the first draft of the manuscript. XS, MHH, SDY, CPE, SNB, and TSC provided critical input at all stages and critically reviewed and contributed to the final draft. CEK and TSC are guarantors.

**Funding:** This work was supported by grants HL66262 and T32 HL082610-05 from the National Institutes of Health, and American Heart Association Texas Affiliate award 02651404. Life Fitness (Schiller Park, Illinois) provided exercise equipment for this study.

**Competing interest statement:** All authors have completed the Unified Competing Interest form at [www.icmje.org/coi\\_disclosure.pdf](http://www.icmje.org/coi_disclosure.pdf) (available on request from the corresponding author) and declare: no support from any organisation for the submitted work (aside from the funding sources listed); no financial relationships with any organisations that might have an interest in the submitted work in the previous three years; and no other relationships or activities that could appear to have influenced the submitted work.

**Ethical approval:** Institutional Review Boards of the Cooper Institute (Dallas, TX) and the Pennington Biomedical Research Center (Baton Rouge, LA).

**Role of the study sponsors:** The sponsors had no role in the study design, protocol development, or in conducting the trial, data collection, data analysis, or preparation of the manuscript.

**Data sharing:** The data set will be available from the corresponding author as part of an academic collaboration.

**Trial registration:** Clinicaltrials.gov identification number NCT00011193.

## REFERENCES

1. Kravitz HM, Ganz PA, Bromberger J, et al. Sleep difficulty in women at midlife: a community survey of sleep and the menopausal transition. *Menopause* 2003;10:19-28.
2. National Institutes of Health. National Institutes of Health State-of-the-Science Conference statement: management of menopause-related symptoms. *Ann Intern Med* 2005;142:1003-13.
3. Buscemi N, Vandermeer B, Friesen C, et al. The efficacy and safety of drug treatments for chronic insomnia in adults: a meta-analysis of RCTs. *J Gen Intern Med* 2007;22:1335-50.
4. Nowakowski S, Meliska CJ, Martinez LF, et al. Sleep and menopause. *Curr Neurol Neurosci Rep* 2009;9:165-72.
5. Sarti CD, Chiantera A, Graziottin A, et al. Hormone therapy and sleep quality in women around menopause. *Menopause* 2005;12:545-51.
6. Kalleinen N, Polo O, Himanen SL, et al. The effect of estrogen plus progestin treatment on sleep: a randomized, placebo-controlled, double-blind trial in premenopausal and late postmenopausal women. *Climacteric* 2008;11:233-43.
7. Youngstedt SD, Kline CE. Epidemiology of exercise and sleep. *Sleep Biol Rhythms* 2006;4:215-21.
8. Youngstedt SD. Effects of exercise on sleep. *Clin Sports Med* 2005;24:355-65.
9. Tworoger SS, Yasui Y, Vitiello MV, et al. Effects of a yearlong moderate-intensity exercise and a stretching intervention on sleep quality in postmenopausal women. *Sleep* 2003;26:830-6.
10. Elavsky S, McAuley E. Lack of perceived sleep improvement after 4-month structured exercise programs. *Menopause* 2007;14:535-40.

- 1  
2  
3 11. Wilbur J, Miller AM, McDevitt J, et al. Menopausal status, moderate-intensity walking, and  
4 symptoms in midlife women. *Res Theory Nurs Pract* 2005;19:163-80.  
5  
6
- 7  
8 12. King AC, Oman RF, Brassington GS, et al. Moderate-intensity exercise and self-rated  
9 quality of sleep in older adults. A randomized controlled trial. *JAMA* 1997;277:32-7.  
10  
11
- 12 13. Morss GM, Jordan AN, Skinner JS, et al. Dose Response to Exercise in Women aged 45-75  
13 yr (DREW): design and rationale. *Med Sci Sports Exerc* 2004;36:336-44.  
14  
15
- 16 14. Church TS, Earnest CP, Skinner JS, et al. Effects of different doses of physical activity on  
17 cardiorespiratory fitness among sedentary, overweight or obese postmenopausal women  
18 with elevated blood pressure: a randomized controlled trial. *JAMA* 2007;297:2081-91.  
19  
20
- 21 15. NIH Consensus Development Panel on Physical Activity and Cardiovascular Health.  
22 Physical activity and cardiovascular health. *JAMA* 1996;276:241-6.  
23  
24
- 25 16. Hays RD, Stewart AL. Sleep measures. In: Stewart AL, Ware JE, Jr., eds. *Measuring*  
26 *Functioning and Well-being: The Medical Outcomes Study Approach*. Durham, NC: Duke  
27 University Press 1992:235-59.  
28  
29
- 30 17. Hays RD, Martin SA, Sesti AM, et al. Psychometric properties of the Medical Outcomes  
31 Study Sleep measure. *Sleep Med* 2005;6:41-4.  
32  
33
- 34 18. Allen RP, Kosinski M, Hill-Zabala CE, et al. Psychometric evaluation and tests of validity  
35 of the Medical Outcomes Study 12-item Sleep Scale (MOS sleep). *Sleep Med* 2009;10:531-  
36  
37  
38  
39  
40  
41  
42  
43  
44  
45  
46  
47  
48  
49  
50  
51  
52  
53  
54  
55  
56  
57  
58  
59  
60
19. Earnest CP, Lavie CJ, Blair SN, et al. Heart rate variability characteristics in sedentary  
postmenopausal women following six months of exercise training: the DREW study. *PLoS*  
*One* 2008;3:e2288.

- 1  
2  
3 20. Task Force of the European Society of Cardiology and the North American Society of  
4 Pacing and Electrophysiology. Heart rate variability: standards of measurement,  
5 physiological interpretation, and clinical use. *Eur Heart J* 1996;17:354-81.  
6  
7
- 8  
9 21. Cohen J. *Statistical Power Analysis for the Behavioral Sciences*. 2<sup>nd</sup> ed. Philadelphia, PA:  
10 Lawrence Erlbaum Associates, Inc. 1988.  
11  
12
- 13 22. Church TS, Martin CK, Thompson AM, et al. Changes in weight, waist circumference and  
14 compensatory responses with different doses of exercise among sedentary, overweight  
15 postmenopausal women. *PLoS One* 2009;4:e4515.  
16  
17
- 18 23. Soares CN, Joffe H, Rubens R, et al. Eszopiclone in patients with insomnia during  
19 perimenopause and early postmenopause: a randomized controlled trial. *Obstet Gynecol*  
20 2006;108:1402-10.  
21  
22
- 23 24. Fogelholm M, Kronholm E, Kukkonen-Harjula K, et al. Sleep-related disturbances and  
24 physical inactivity are independently associated with obesity in adults. *Int J Obes (Lond)*  
25 2007;31:1713-21.  
26  
27
- 28 25. Dixon JB, Schachter LM, O'Brien PE. Sleep disturbance and obesity: changes following  
29 surgically induced weight loss. *Arch Intern Med* 2001;161:102-6.  
30  
31
- 32 26. Bonnet MH, Arand DL. Heart rate variability in insomniacs and matched normal sleepers.  
33 *Psychosom Med*. 1998;60:610-5.  
34  
35
- 36 27. Routledge FS, Campbell TS, Fetridge-Durdle JA, et al. Improvements in heart rate  
37 variability with exercise therapy. *Can J Cardiol* 2010;26:303-12.  
38  
39
- 40 28. Lee AJ, Lin WH. Association between sleep quality and physical fitness in female young  
41 adults. *J Sports Med Phys Fitness* 2007;47:462-7.  
42  
43  
44  
45  
46  
47  
48  
49  
50  
51  
52  
53  
54  
55  
56  
57  
58  
59  
60

- 1  
2  
3 29. Buysse DJ, Reynolds CF III, Monk TH, et al. The Pittsburgh Sleep Quality Index: a new  
4 instrument for psychiatric practice and research. *Psychiatry Res* 1989;28:193-213.  
5  
6  
7
- 8 30. Young T, Rabago D, Zgierska A, et al. Objective and subjective sleep quality in  
9 premenopausal, perimenopausal, and postmenopausal women in the Wisconsin Sleep Cohort  
10 Study. *Sleep* 2003;26:667-72.  
11  
12  
13
- 14 31. Perlis ML, Smith MT, Andrews PJ, et al. Beta/Gamma EEG activity in patients with  
15 primary and secondary insomnia and good sleeper controls. *Sleep* 2001;24:110-7.  
16  
17  
18
- 19 32. Baker FC, Wolfson AR, Lee KA. Association of sociodemographic, lifestyle, and health  
20 factors with sleep quality and daytime sleepiness in women: findings from the 2007 National  
21 Sleep Foundation "Sleep in America Poll". *J Womens Health* 2009;18:841-9.  
22  
23  
24
- 25 33. Young T, Finn L, Austin D, et al. Menopausal status and sleep-disordered breathing in the  
26 Wisconsin Sleep Cohort Study. *Am J Respir Crit Care Med* 2003;167:1181-5.  
27  
28  
29
- 30 34. Young T, Peppard PE, Taheri S. Excess weight and sleep-disordered breathing. *J Appl*  
31 *Physiol* 2005;99:1592-9.  
32  
33  
34
- 35 35. Kline CE, Crowley EP, Ewing GB, et al. The effect of exercise training on obstructive sleep  
36 apnea and sleep quality: a randomized controlled trial. *Sleep* 2011;34:1631-40.  
37  
38  
39
- 40 36. Singh NA, Clements KM, Fiatarone MA. A randomized controlled trial of the effect of  
41 exercise on sleep. *Sleep* 1997;20:95-101.  
42  
43  
44
- 45 37. Singh NA, Stavrinou TM, Scarbek Y, et al. A randomized controlled trial of high versus low  
46 intensity weight training versus general practitioner care for clinical depression in older  
47 adults. *J Gerontol A Biol Sci Med Sci* 2005;60:768-76.  
48  
49  
50  
51  
52  
53  
54  
55  
56  
57  
58  
59  
60

## FIGURE LEGENDS

**Figure 1.** *Participant screening and study flow.* Of 4545 screened for participation, 464 postmenopausal women were randomised to one of four treatments. Baseline MOS Sleep data were available for 437 participants; those who discontinued the study or without follow-up MOS Sleep data had baseline data carried forward for analysis. BMI: body mass index; KKW: kilocalories of energy expenditure per kilogram of body weight per week; MOS: Medical Outcomes Study.

**Figure 2.** *Change in MOS Sleep Problems Index scores among treatment groups.* Data presented as least-squares means  $\pm$  95% confidence intervals. Analyses adjusted for age, BMI, sleep medication use, hormone replacement therapy use, and baseline MOS SPI score. \* Indicates difference from control ( $P = .02$ ). KKW: kilocalories of energy expenditure per kilogram of body weight per week; MOS: Medical Outcomes Study.

## TABLES

**Table 1. Baseline Participant Characteristics.**

|                                          | All<br>(N=437) | Control<br>(n=92) | Exercise Groups  |                 |                  |
|------------------------------------------|----------------|-------------------|------------------|-----------------|------------------|
|                                          |                |                   | 4 KKW<br>(n=151) | 8 KKW<br>(n=99) | 12 KKW<br>(n=95) |
| Age, y                                   | 57.32 (6.46)   | 57.14 (5.91)      | 57.78 (6.53)     | 57.58 (6.63)    | 56.47 (6.72)     |
| Education, y                             | 14.03 (2.11)   | 14.01 (2.12)      | 13.80 (2.02)     | 14.37 (2.06)    | 14.00 (2.28)     |
| Married, No. (%)                         | 398 (91)       | 86 (93)           | 141 (94)         | 87 (88)         | 84 (88)          |
| Ethnicity/race, No. (%)                  |                |                   |                  |                 |                  |
| White                                    | 278 (64)       | 58 (63)           | 92 (61)          | 60 (61)         | 68 (72)          |
| African-American                         | 128 (29)       | 23 (25)           | 49 (32)          | 32 (32)         | 24 (25)          |
| Hispanic/Other                           | 31 (7)         | 11 (12)           | 10 (7)           | 7 (7)           | 3 (3)            |
| Employed, No. (%)                        | 304 (70)       | 62 (67)           | 105 (70)         | 67 (68)         | 70 (74)          |
| Cigarette Smoking, No. (%)               | 25 (6)         | 5 (5)             | 8 (5)            | 4 (4)           | 8 (8)            |
| Medication Use, No. (%)                  |                |                   |                  |                 |                  |
| Antihypertensive                         | 126 (29)       | 22 (24)           | 41 (27)          | 32 (32)         | 31 (33)          |
| Hyperlipidemia                           | 73 (17)        | 14 (15)           | 31 (21)          | 17 (17)         | 11 (12)          |
| Thyroid                                  | 65 (15)        | 12 (13)           | 19 (13)          | 16 (16)         | 18 (19)          |
| Antidepressant                           | 78 (18)        | 16 (17)           | 28 (19)          | 18 (18)         | 16 (17)          |
| HRT                                      | 202 (46)       | 48 (52)           | 67 (44)          | 43 (43)         | 44 (46)          |
| Antianxiety                              | 20 (5)         | 7 (8)             | 7 (5)            | 4 (4)           | 2 (2)            |
| Sedatives/sleep aids                     | 12 (3)         | 4 (4)             | 5 (3)            | 3 (3)           | 0 (0)            |
| Energy Intake, kcal/d                    | 2277.2 (952.6) | 2277.4 (947.9)    | 2213.1 (941.6)   | 2290.7 (930.7)  | 2364.7 (1003.5)  |
| Anthropometrics                          |                |                   |                  |                 |                  |
| Weight, kg                               | 84.46 (11.82)  | 85.77 (12.43)     | 83.56 (11.42)    | 84.74 (12.43)   | 84.33 (11.24)    |
| Body mass index, kg/m <sup>2</sup>       | 31.77 (3.85)   | 32.29 (3.94)      | 31.54 (3.80)     | 31.98 (4.08)    | 31.44 (3.58)     |
| Cardiorespiratory Fitness                |                |                   |                  |                 |                  |
| Relative VO <sub>2peak</sub> , mL/kg/min | 15.37 (2.92)   | 15.56 (3.00)      | 15.44 (3.00)     | 14.70 (2.49)    | 15.77 (3.05)     |
| Absolute VO <sub>2peak</sub> , L/min     | 1.29 (0.26)    | 1.33 (0.28)       | 1.28 (0.24)      | 1.24 (0.24)     | 1.32 (0.26)      |
| Heart Rate Variability <sup>*</sup>      |                |                   |                  |                 |                  |
| rMSSD, ms                                | 22.83 (11.56)  | 23.35 (11.01)     | 23.58 (12.24)    | 23.25 (11.29)   | 20.68 (11.19)    |
| Subjective Sleep Quality                 |                |                   |                  |                 |                  |
| MOS Sleep Problems Index                 | 27.92 (18.40)  | 28.37 (19.71)     | 27.03 (17.92)    | 27.35 (18.10)   | 29.47 (18.32)    |
| Sleep disturbance, No. (%)               | 200 (46)       | 38 (41)           | 65 (43)          | 49 (49)         | 48 (51)          |

Data presented as mean (standard deviation) unless otherwise indicated. \* Samples for rMSSD

data were 351, 79, 123, 73, and 76 participants for All, Control, 4 KKW, 8 KKW, and 12 KKW groups, respectively. Abbreviations: HRT: hormone replacement therapy; KKW: kilocalories of energy expenditure per kilogram of body weight per week; MOS: Medical Outcomes Study; rMSSD: square root of the mean of the sum of the squares of differences between adjacent R-R intervals; VO<sub>2peak</sub>: peak rate of oxygen consumption.

**Table 2.** Associations Between Baseline Sleep Quality and BMI, Parasympathetic Tone, and Cardiorespiratory Fitness.

| Variable                              | MOS SPI score (95% CI) | OR of MOS SPI > 25 (95% CI) |
|---------------------------------------|------------------------|-----------------------------|
| <b>BMI (kg/m<sup>2</sup>)</b>         |                        |                             |
| Q1: ≥ 34.7                            | 27.95 (24.54, 31.36)   | 1.00 (referent)             |
| Q2: 31.7 - < 34.7                     | 24.37 (20.92, 27.82)   | 0.60 (0.35, 1.03)           |
| Q3: 28.6 - < 31.7                     | 30.48 (27.03, 33.94)   | 1.14 (0.67, 1.96)           |
| Q4: < 28.6                            | 28.85 (25.46, 32.24)   | 0.98 (0.58, 1.68)           |
| Linear <i>P</i>                       | .26                    | .53                         |
| <b>rMSSD (ms)</b>                     |                        |                             |
| Q1: < 15.0                            | 31.77 (27.95, 35.59)   | 1.00 (referent)             |
| Q2: 15.0 - < 20.9                     | 24.77 (21.04, 28.51)*  | 0.53 (0.29, 0.97)           |
| Q3: 20.9 - < 29.0                     | 25.22 (21.36, 29.09)*  | 0.43 (0.23, 0.81)           |
| Q4: ≥ 29.0                            | 26.50 (22.64, 30.35)*  | 0.46 (0.25, 0.86)           |
| Linear <i>P</i>                       | .08                    | .01                         |
| <b>VO<sub>2peak</sub> (mL/kg/min)</b> |                        |                             |
| Q1: < 13.4                            | 29.55 (25.86, 33.25)   | 1.00 (referent)             |
| Q2: 13.4 - < 15.2                     | 28.80 (25.35, 32.25)   | 1.22 (0.70, 2.13)           |
| Q3: 15.2 - < 17.0                     | 28.60 (25.05, 32.15)   | 1.04 (0.58, 1.87)           |
| Q4: ≥ 17.0                            | 24.91 (21.41, 28.42)   | 0.63 (0.34, 1.14)           |
| Linear <i>P</i>                       | .10                    | .09                         |

Continuous baseline MOS SPI scores (left panels) and odds ratios of having significant sleep disturbance at baseline (MOS SPI > 25) (right panels) across quartiles of baseline BMI, rMSSD, and VO<sub>2peak</sub>. All analyses adjusted for age, BMI, sleep medication use, and HRT use, except when the covariate quartile was the independent variable. \* indicates significant difference ( $P \leq .05$ ) in MOS SPI score compared to quartile 1 (referent group). Abbreviations: BMI: body mass index; CI: confidence interval; MOS: Medical Outcomes Study; Q: quartile; rMSSD: square root of the mean of the sum of the squares of differences between adjacent R-R intervals; SPI: Sleep Problems Index; VO<sub>2peak</sub>: peak rate of oxygen consumption.



**Table 3.** Prevalence and Odds of Significant Sleep Disturbance (i.e., MOS SPI > 25) at Post-Intervention.

|                            | Prevalence   | Model 1           | Model 2           | Model 3           | Model 4           |
|----------------------------|--------------|-------------------|-------------------|-------------------|-------------------|
|                            | <i>n</i> (%) | OR (95% CI)       | OR (95% CI)       | OR (95% CI)       | OR (95% CI)       |
| Control                    | 41 (45%)     | 1.00 (referent)   | 1.00 (referent)   | 1.00 (referent)   | 1.00 (referent)   |
| 4 KKW                      | 46 (31%)     | 0.37 (0.19, 0.73) | 0.37 (0.19, 0.73) | 0.34 (0.19, 0.73) | 0.37 (0.19, 0.73) |
| 8 KKW                      | 33 (33%)     | 0.36 (0.17, 0.77) | 0.36 (0.17, 0.77) | 0.32 (0.17, 0.77) | 0.36 (0.17, 0.77) |
| 12 KKW                     | 31 (33%)     | 0.34 (0.16, 0.72) | 0.34 (0.16, 0.72) | 0.28 (0.16, 0.72) | 0.34 (0.16, 0.72) |
| Linear trend <i>P</i>      |              | .01               | .01               | .006              | .02               |
| Weight change              |              | ---               | 1.00 (0.93, 1.08) | ---               | ---               |
| VO <sub>2peak</sub> change |              | ---               | ---               | 1.10 (0.95, 1.26) | ---               |
| rMSSD change               |              | ---               | ---               | ---               | 1.01 (0.98, 1.04) |

Model 1 adjusted for age, BMI, sleep medication use, hormone replacement therapy use, and

baseline sleep quality (SPI ≤ 25, SPI > 25); Model 2 adjusted for change in body weight in

addition to variables included in Model 1; Model 3 adjusted for change in VO<sub>2peak</sub> in addition to

variables included in Model 1; Model 4 adjusted for change in rMSSD in addition to variables

included in Model 1. Abbreviations: CI: confidence interval; KKW: kilocalories of energy

expenditure per kilogram of body weight per week; OR: odds ratio; rMSSD: square root of the

mean of the sum of the squares of differences between adjacent R-R intervals; VO<sub>2peak</sub>: peak rate

of oxygen consumption.

1  
2  
3  
4  
5  
6  
7  
8  
9  
10  
11  
12  
13  
14  
15  
16  
17  
18  
19  
20  
21  
22  
23  
24  
25  
26  
27  
28  
29  
30  
31  
32  
33  
34  
35  
36  
37  
38  
39  
40  
41  
42  
43  
44  
45  
46  
47  
48  
49

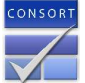

# CONSORT 2010 checklist of information to include when reporting a randomised trial\*

| Section/Topic                    | Item No | Checklist item                                                                                                                                                                              | Reported on page No |
|----------------------------------|---------|---------------------------------------------------------------------------------------------------------------------------------------------------------------------------------------------|---------------------|
| <b>Title and abstract</b>        |         |                                                                                                                                                                                             |                     |
|                                  | 1a      | Identification as a randomised trial in the title                                                                                                                                           | p.1                 |
|                                  | 1b      | Structured summary of trial design, methods, results, and conclusions (for specific guidance see CONSORT for abstracts)                                                                     | pp. 2-3             |
| <b>Introduction</b>              |         |                                                                                                                                                                                             |                     |
| Background and objectives        | 2a      | Scientific background and explanation of rationale                                                                                                                                          | pp. 5-6             |
|                                  | 2b      | Specific objectives or hypotheses                                                                                                                                                           | p. 6                |
| <b>Methods</b>                   |         |                                                                                                                                                                                             |                     |
| Trial design                     | 3a      | Description of trial design (such as parallel, factorial) including allocation ratio                                                                                                        | p. 6, p. 10         |
|                                  | 3b      | Important changes to methods after trial commencement (such as eligibility criteria), with reasons                                                                                          | NA                  |
| Participants                     | 4a      | Eligibility criteria for participants                                                                                                                                                       | pp. 6-7             |
|                                  | 4b      | Settings and locations where the data were collected                                                                                                                                        | p. 6                |
| Interventions                    | 5       | The interventions for each group with sufficient details to allow replication, including how and when they were actually administered                                                       | pp. 7-8             |
| Outcomes                         | 6a      | Completely defined pre-specified primary and secondary outcome measures, including how and when they were assessed                                                                          | pp. 8-10            |
|                                  | 6b      | Any changes to trial outcomes after the trial commenced, with reasons                                                                                                                       | NA                  |
| Sample size                      | 7a      | How sample size was determined                                                                                                                                                              | p. 10               |
|                                  | 7b      | When applicable, explanation of any interim analyses and stopping guidelines                                                                                                                | NA                  |
| <b>Randomisation:</b>            |         |                                                                                                                                                                                             |                     |
| Sequence generation              | 8a      | Method used to generate the random allocation sequence                                                                                                                                      | p. 7                |
|                                  | 8b      | Type of randomisation; details of any restriction (such as blocking and block size)                                                                                                         | p. 7                |
| Allocation concealment mechanism | 9       | Mechanism used to implement the random allocation sequence (such as sequentially numbered containers), describing any steps taken to conceal the sequence until interventions were assigned | p. 7                |
| Implementation                   | 10      | Who generated the random allocation sequence, who enrolled participants, and who assigned participants to interventions                                                                     | p. 7                |
| Blinding                         | 11a     | If done, who was blinded after assignment to interventions (for example, participants, care providers, those                                                                                | p. 8                |

|    |                          |                                                                                                                     |                      |
|----|--------------------------|---------------------------------------------------------------------------------------------------------------------|----------------------|
| 1  |                          |                                                                                                                     |                      |
| 2  |                          | assessing outcomes) and how                                                                                         |                      |
| 3  |                          |                                                                                                                     |                      |
| 4  |                          | 11b If relevant, description of the similarity of interventions                                                     | p. 7                 |
| 5  | Statistical methods      | 12a Statistical methods used to compare groups for primary and secondary outcomes                                   | pp. 10-11            |
| 6  |                          | 12b Methods for additional analyses, such as subgroup analyses and adjusted analyses                                | pp. 10-11            |
| 7  |                          |                                                                                                                     |                      |
| 8  | <b>Results</b>           |                                                                                                                     |                      |
| 9  | Participant flow (a      | 13a For each group, the numbers of participants who were randomly assigned, received intended treatment,            |                      |
| 10 | diagram is strongly      | and were analysed for the primary outcome                                                                           | p. 12; Fig. 1        |
| 11 | recommended)             | 13b For each group, losses and exclusions after randomisation, together with reasons                                | Fig. 1               |
| 12 | Recruitment              | 14a Dates defining the periods of recruitment and follow-up                                                         | p. 6                 |
| 13 |                          | 14b Why the trial ended or was stopped                                                                              | NA                   |
| 14 |                          |                                                                                                                     |                      |
| 15 | Baseline data            | 15 A table showing baseline demographic and clinical characteristics for each group                                 | p. 12, Table 1       |
| 16 | Numbers analysed         | 16 For each group, number of participants (denominator) included in each analysis and whether the analysis          |                      |
| 17 |                          | was by original assigned groups                                                                                     | p.11, Fig. 1         |
| 18 |                          |                                                                                                                     |                      |
| 19 | Outcomes and             | 17a For each primary and secondary outcome, results for each group, and the estimated effect size and its           | p. 13, Fig. 2, Table |
| 20 | estimation               | precision (such as 95% confidence interval)                                                                         | 3                    |
| 21 |                          | 17b For binary outcomes, presentation of both absolute and relative effect sizes is recommended                     | p. 13, Table 3       |
| 22 | Ancillary analyses       | 18 Results of any other analyses performed, including subgroup analyses and adjusted analyses,                      |                      |
| 23 |                          | distinguishing pre-specified from exploratory                                                                       | pp. 13-14            |
| 24 |                          |                                                                                                                     |                      |
| 25 | Harms                    | 19 All important harms or unintended effects in each group (for specific guidance see CONSORT for harms)            | NA                   |
| 26 |                          |                                                                                                                     |                      |
| 27 | <b>Discussion</b>        |                                                                                                                     |                      |
| 28 | Limitations              | 20 Trial limitations, addressing sources of potential bias, imprecision, and, if relevant, multiplicity of analyses | pp. 16-18            |
| 29 | Generalisability         | 21 Generalisability (external validity, applicability) of the trial findings                                        | p. 15, pp. 17-18     |
| 30 | Interpretation           | 22 Interpretation consistent with results, balancing benefits and harms, and considering other relevant evidence    | pp. 14-15            |
| 31 |                          |                                                                                                                     |                      |
| 32 | <b>Other information</b> |                                                                                                                     |                      |
| 33 | Registration             | 23 Registration number and name of trial registry                                                                   | p. 3, p. 20          |
| 34 | Protocol                 | 24 Where the full trial protocol can be accessed, if available                                                      | p. 6, Ref. 13        |
| 35 | Funding                  | 25 Sources of funding and other support (such as supply of drugs), role of funders                                  | pp. 19-20            |
| 36 |                          |                                                                                                                     |                      |

\*We strongly recommend reading this statement in conjunction with the CONSORT 2010 Explanation and Elaboration for important clarifications on all the items. If relevant, we also recommend reading CONSORT extensions for cluster randomised trials, non-inferiority and equivalence trials, non-pharmacological treatments, herbal interventions, and pragmatic trials. Additional extensions are forthcoming: for those and for up to date references relevant to this checklist, see [www.consort-statement.org](http://www.consort-statement.org).
